# Supplementary material
Source: ML conference proceedings conference paper supplement (https://openreview.net/forum?id=jVuknNhGmV)
Supplement: supplementary_material [file attachment]

## Sheet: Sheet1
-0.375655	-2.61176	-1.12247	-0.77183	-1.93156	-0.160426	1.38605	0.500848	2.65018	0.235053
-2.52817	-3.07297	-1.35231	-1.83055	-0.83222	-0.206112	2.28649	0.647787	4.291	3.32429
-1.13459	-4.30154	-1.26109	-0.830646	1.02625	0.969964	3.2429	3.69985	2.70434	2.5525
-0.255188	-2.76121	-0.326377	-1.3272	-0.22681	-0.110402	1.9311	0.523933	3.41733	2.12697
-1.68096	-2.24937	-1.3053	-0.475135	-0.600732	1.13415	0.452526	0.536091	0.901419	0.574188
-0.537892	-4.06014	-1.58419	-1.22775	-1.10725	0.886255	0.411101	-0.0157098	2.21663	2.24949
-2.32242	-2.38405	-1.53291	-1.80037	-0.0355735	0.315513	1.07145	0.454499	1.47934	2.56961
-0.866231	-3.09989	0.0296515	-1.65972	-0.877355	1.10367	0.741245	-0.295275	2.33805	2.72284
-2.17243	-2.87786	-1.04614	-0.788486	-0.73124	1.03616	0.50137	-1.25028	2.46509	2.53233
-1.95779	-1.41718	-1.62811	-0.388692	0.517889	1.08449	1.17353	-0.306384	1.20972	2.00572
-3.10062	-0.855276	-0.531834	-0.205354	-0.0977272	-0.491279	0.147978	0.244047	1.21542	1.43323
-1.09841	-1.49751	-0.529687	-0.105874	0.421549	3.33603	2.60053	1.45646	1.76167	2.15045
-1.09914	-2.68373	0.519916	-2.79079	0.910696	-0.0239465	-0.186536	1.43251	-0.432797	3.69622
-2.12289	-2.93577	0.0880925	0.516846	-0.235681	1.6214	1.3474	0.853205	2.84769	1.90939
-2.26789	-1.46964	-0.850114	0.0612657	-0.64834	1.06425	1.58604	2.28886	2.49212	2.12254
-2.69166	-2.39675	-1.38432	0.11119	1.50402	-1.08602	1.2227	1.80716	3.32194	2.95895
-2.68717	-2.84521	-1.83165	-1.45241	0.609031	0.230723	1.93211	0.645749	1.63347	1.60173
-2.67125	-2.01266	-0.613194	-0.808139	-2.14425	-1.00791	2.36326	-0.0634197	2.35881	2.59372
-3.11731	-1.76558	-0.991085	-2.73635	0.403339	0.698034	0.207991	0.353877	1.94049	1.84244
-0.340198	-1.25796	-2.2518	-1.64622	-0.0788709	0.100226	1.3103	1.51409	1.35667	3.63671
-2.19184	-2.88763	-1.90692	-0.208047	1.28367	0.47225	-1.07982	0.820615	2.76363	1.23054
-2.74716	-0.307545	-2.2974	-0.747456	0.00215144	2.63053	1.29179	3.24839	2.9368	0.508093
-1.94919	-2.637	-2.06721	-1.59968	1.8917	0.204481	0.13267	1.57368	3.39015	1.39115
-1.80908	0.100255	-2.27136	-1.9688	-1.89072	-0.344942	1.94014	0.835447	3.27514	4.6617
-1.87984	-1.3828	-1.61233	0.478591	-0.727258	0.670198	1.31123	0.621811	1.41571	1.54244
-1.69983	-2.35225	-0.714715	-2.59786	0.23911	0.52003	1.90501	0.219438	2.85146	2.44021
-3.14252	-2.34934	-2.06045	-1.19996	1.07696	-0.140184	0.373445	0.277136	1.17671	1.54111
-2.20889	-1.41338	-1.24103	-0.613356	0.822217	0.249526	2.1214	-0.628565	1.09999	1.82844
-1.16102	-1.0689	-0.125965	-1.34432	0.205428	1.61132	-1.48495	2.16679	3.72511	2.1374
-1.71441	-1.11486	-2.1469	-2.09323	-2.77139	1.48275	2.60323	0.171916	2.93634	-0.00459067
-2.7544	-0.747132	-0.787251	0.00451584	1.01382	-0.999615	2.4568	-0.275215	1.41055	0.651182
-1.48707	-2.29809	-1.90159	-1.58585	-0.553177	0.612374	-0.33258	1.698	-0.00851621	1.19572
-1.51148	-2.07557	-0.708219	-0.736225	0.177153	1.50155	-0.129192	1.17149	1.17556	1.04905
-0.868371	-0.480183	-1.90914	0.160969	0.209545	-1.42915	1.64374	0.0746497	0.857987	3.22854
0.185575	-3.3965	0.0602454	0.916716	0.0883844	-0.729133	1.95279	0.0889629	1.40939	1.46904
-3.44411	-2.50447	-1.46268	-1.01864	-0.152305	-0.591354	1.1914	0.100536	3.27978	1.8998
-1.83996	-1.12383	-2.56149	-0.878751	1.06042	-2.43001	1.51005	1.34901	1.99354	1.16091
-1.68437	-4.0222	-1.59746	-1.04486	1.81746	-1.0344	1.83653	1.52849	2.94055	2.34634
-2.3062	-1.17203	-0.503846	-1.07081	0.364051	-1.07944	2.04933	0.0978183	0.0524606	2.32263
-1.76991	-1.23799	0.06506	-0.421339	1.93103	0.750831	1.12962	1.25479	0.555311	0.941689
-2.22233	-2.20076	-1.8258	-1.51802	-2.10191	0.468965	0.724006	2.57442	1.06644	2.82596
-1.81344	-1.58995	-1.48185	-1.21012	0.0254234	0.039222	1.83894	4.62257	2.35778	1.8113
-1.8017	-1.88099	1.38427	-0.388446	1.34718	-0.379006	-0.321088	2.34397	0.716836	1.87821
-2.67066	-1.62244	-1.67341	-1.32505	1.48921	0.045654	0.337851	-1.29085	3.04586	2.48464
-1.87818	-0.870516	-0.248144	-1.14217	-0.883027	0.360431	1.98329	-0.679363	1.96056	0.20584
-0.801082	-1.81484	-2.44095	0.825199	-2.60642	2.10673	3.09024	-0.539709	1.93386	2.88807
-2.37528	-2.63873	-0.5629	-1.528	1.8748	2.44727	0.81422	0.99743	3.91008	2.42637
-1.57651	-1.92266	-1.53327	-1.3985	-0.472585	2.06028	0.800875	-0.647272	2.75698	1.60331
-2.34385	-1.9564	-0.635368	-1.15717	0.202121	0.71823	1.10265	1.09911	2.21089	1.70523
-2.62	-1.30197	-0.461349	-0.0243688	-2.41554	-0.902085	1.53654	1.847	1.65172	0.655449
-2.44713	-0.775492	-2.46106	0.474779	-0.347932	-1.82676	1.67087	0.505628	1.22763	-0.614739
-1.59651	-1.40642	0.203734	-0.267384	1.00866	0.243962	1.57973	2.52824	2.85982	1.30581
-3.09491	-1.83062	-0.155792	-0.088052	-0.985713	0.539223	1.76694	0.260624	3.36679	0.418815
-1.25944	-2.9537	0.476095	-2.4913	1.09455	-0.93587	2.76009	1.17249	3.52262	2.25744
-2.26622	-1.96739	-1.96229	-2.65972	-0.246092	0.293316	2.19818	1.45702	1.98789	2.45612
-3.37312	-1.68484	0.54953	-1.24368	0.205054	0.419491	-0.102148	1.35868	3.14523	2.27346
-1.15384	-2.85952	-0.0267617	-0.75174	-0.67048	1.02247	0.681443	0.413796	1.40774	1.58907
-1.64945	-3.31228	-1.80974	-1.23058	2.33863	-0.0231648	1.11468	2.25028	2.77523	0.0356783
-2.0387	-3.61577	-0.929389	-1.05864	-1.50433	0.743462	0.58611	1.80379	2.63722	2.60351
-0.878582	-1.5911	-0.882915	-0.210251	-1.79363	0.778746	0.991299	0.570291	2.25798	3.41098
-2.02462	-2.77516	-0.73278	-0.431122	-0.00915359	0.141529	1.8056	1.8808	1.12921	2.32223
-0.726244	-0.0328983	-0.289064	0.0185994	-1.12065	-0.605185	1.50172	0.626801	3.40024	4.04584
-3.85798	-0.763836	0.601062	-2.3048	0.162747	0.102722	2.11151	2.07979	2.07104	2.25315
-0.372349	-1.66199	-0.965178	-0.229054	-0.334093	0.529954	1.4775	-0.246306	2.91657	1.75744
-3.19927	-1.13665	-1.54771	-1.9149	-0.319493	-0.156539	-1.30368	2.1193	1.53412	2.39917
-2.18092	-2.60392	-0.797331	0.326621	0.373386	-0.904482	2.04035	0.731636	4.0438	2.56342
-3.23006	-1.44946	0.850662	-3.25998	-0.989975	0.63504	-1.01997	1.28888	2.41382	0.488477
-1.20719	-2.62353	-2.22861	-1.55339	0.376751	-0.343983	1.2007	0.798754	2.27691	3.01778
-1.47942	-3.14434	-0.355142	-1.0416	1.3199	-1.29278	2.18095	1.97752	0.719405	0.905144
-1.19814	-1.95343	-1.23205	-0.928864	0.0945905	-1.67981	2.0154	0.0131421	2.51289	1.5393
-2.18657	-2.10175	-0.984731	0.541336	0.505637	-1.77104	0.378107	2.47572	1.69032	1.89933
-1.13111	-1.24959	-0.969727	0.44292	0.98531	-0.618449	1.22726	-0.215082	1.8413	2.46908
-1.47053	-1.8623	-2.39799	-0.268808	-0.0332853	-0.907787	2.61806	2.55583	0.440027	2.7933
-1.92218	-1.38162	-1.27994	-1.03023	1.90454	-0.404388	0.427191	-0.91988	1.12253	1.58655
-1.76751	-1.31745	0.510099	-2.38387	0.0370295	0.189016	0.0879624	-2.03007	0.732201	0.243641
-2.31012	-4.43484	-0.138487	-2.17036	0.0960214	0.691402	-0.626473	1.10555	3.66857	2.92126
-0.961175	0.18698	1.00105	-1.31948	0.394631	0.71274	-0.319542	2.6342	2.42555	2.72213
-1.55864	-2.10016	-0.454195	0.212867	-1.27242	-1.0413	0.375592	1.43471	1.82614	4.10789
-2.13644	-2.11905	-0.82788	-0.91778	-1.60071	-1.3208	3.08705	-0.29163	1.17093	2.1603
-1.98259	-3.12202	-2.42683	1.05442	1.25976	-1.59168	0.944886	0.749274	-0.00115322	3.20734
-2.51709	-2.99703	-0.810073	-1.13852	0.291632	-1.41278	2.0322	2.34545	3.30627	0.9922
-1.7512	-2.29664	-0.379857	0.658132	0.404374	-0.0241412	1.05657	0.532823	0.420859	3.30277
-1.50479	-2.1747	-1.18646	-0.0807799	0.920126	-0.625854	0.720442	1.40867	0.697969	1.35606
-1.01366	-1.78647	-0.997607	-0.140631	1.41467	0.523727	1.8143	-0.395229	3.20925	4.20959
0.1907	-3.89636	-2.0992	0.465927	-0.519265	0.99439	0.17977	-0.399279	2.42011	-0.563219
-2.64692	-1.09851	-0.529519	-0.281081	0.303422	-3.22261	0.891316	0.803273	2.82995	1.50626
0.528326	-2.24863	0.31938	-0.952325	1.01411	0.10792	1.61456	0.398216	2.3802	1.5842
-1.95633	-2.22631	-0.24583	-0.674862	-0.276319	-1.05562	1.97997	-0.350547	1.35067	2.4438
-0.668543	-2.28731	-2.50381	0.15085	0.397802	0.574782	1.24003	0.301938	2.78667	3.01849
-1.31993	-2.3198	-1.40853	-3.04512	-1.50823	-0.906276	2.21776	1.11494	2.03479	3.15544
-3.27256	-1.68645	-1.07288	0.34194	1.20063	-1.10319	0.655396	-0.276034	1.72596	1.7709
-1.49682	-0.706774	0.0570595	-2.3877	-1.72476	-1.82182	0.581918	0.974283	1.71871	1.54821
-2.11045	-2.61736	-0.747406	0.0992571	0.213514	1.711	0.554421	3.01093	2.01761	2.17623
-1.43724	-1.75926	-0.253821	-0.62761	1.00071	0.798026	0.73458	1.39179	3.40403	2.66944
-1.71933	-2.07311	-2.8575	-0.16604	1.49815	-0.384662	-0.619037	0.497082	1.99617	2.15875
-0.839661	-1.63051	-1.04226	0.486297	1.34936	0.715859	0.418859	2.05718	3.0202	0.642026
-0.0953413	-0.888943	-0.673994	0.303707	1.24446	0.909907	-0.00835556	-0.0198677	0.879225	1.53501
-1.34095	-3.62744	-0.273138	-2.10634	-0.338558	-1.52957	-0.144814	1.76049	3.30127	0.773995
-1.39768	-1.57972	0.490555	-0.876322	-0.191564	-0.291235	0.971079	1.29281	1.38446	3.19292
-1.18905	-0.955558	-2.78191	-0.563741	1.987	1.31495	1.99693	-0.319818	-1.48487	2.35217
-2.40088	-1.17599	-1.47486	-0.0757612	-1.30424	-0.0686708	1.55375	0.495093	0.829661	0.513007
-2.56231	-0.0451219	-0.253784	-1.29282	0.698971	-0.835312	1.96104	1.4292	1.99217	0.153758
-3.33195	-3.76069	-0.482311	-0.814934	-1.92194	1.51264	2.11332	2.93257	1.38974	2.79689
-3.65072	-2.89056	0.389075	-0.352057	0.277874	-0.137581	0.854915	1.52095	2.53821	2.83606
-3.11912	-0.0439211	-1.81749	-1.75045	-0.408975	0.225997	1.76828	1.15533	3.21343	3.49936
-2.3265	-3.34268	-2.84291	-2.07133	1.68767	1.5074	1.69307	2.35381	3.85148	0.39559
-0.885617	-2.58652	0.362807	-1.75554	1.05186	-1.28289	0.829888	2.16946	2.18264	2.86541
-3.23685	-1.12416	-0.684779	0.994342	-0.201322	-1.53334	1.79923	1.14013	1.83072	2.04319
-1.37664	-2.43496	-2.07306	-1.46325	0.897331	-0.352114	0.326573	-1.48529	2.21675	3.24629
-0.59246	-1.8709	0.336105	-1.25455	-0.464351	1.0427	1.59423	1.64934	1.93707	1.55667
-0.38305	-1.49726	-0.205288	-1.29332	0.876924	0.710958	0.643349	1.12299	1.87837	3.02798
-0.441194	-1.8906	-1.53396	-2.06903	-1.16856	0.594365	-0.12828	-0.41237	1.85716	1.48506
-3.21974	0.449369	-0.4254	-2.04958	-0.848973	-1.43792	0.412503	0.640687	0.918352	3.23388
-2.54577	-2.19884	-1.02506	-0.930592	0.205422	-0.0401067	0.186661	2.10096	1.41523	1.81824
-2.7004	-2.20339	-0.957193	-1.56748	1.13026	-1.44725	1.22805	1.80254	2.70262	2.31049
-1.75733	-1.79817	-1.09008	-0.0950352	0.472594	-1.47246	2.11424	2.16104	3.29126	1.05333
-1.33898	-0.207842	-1.88298	-1.90622	-0.120827	0.792018	0.760725	-0.91664	1.42704	1.6068
-2.12046	-3.23312	-2.49068	-1.13321	-3.92751	0.00730876	-1.04255	1.2147	3.08943	2.31442
-3.18232	-2.66575	-1.34066	-0.662108	0.802456	-0.841333	1.72106	2.1474	2.3325	1.03112
-3.6742	-1.17497	-0.209099	-1.27674	-0.219892	0.959468	1.6852	0.270767	1.57549	3.14345
-2.49821	-2.31098	-0.466466	-0.568313	-1.29174	-1.85456	2.27904	-0.032917	1.66644	1.10314
-2.00189	-3.39662	-1.33043	0.782417	-0.279425	-0.467586	0.34959	-0.173182	2.40631	2.98326
-2.86132	-1.32529	-1.1148	-2.77139	1.04093	1.39741	1.91989	1.51145	3.34825	0.829548
-1.38146	-2.44317	-0.13055	-0.533478	-0.238018	-1.68391	1.25042	0.281713	0.641699	1.52564
-0.189465	-3.30573	-0.0455876	-0.498481	0.567724	0.00631788	1.72678	0.98999	1.25763	3.79855
-2.34499	-2.23084	-0.201969	-2.86336	-0.333274	-1.05618	-0.436424	0.0124264	2.00095	1.88688
-4.79309	-0.0624712	-0.375008	-0.680598	-0.234574	-1.65636	1.16116	1.51639	1.34472	1.54778
-1.63367	-3.04459	0.239439	-3.28303	-0.0251215	-0.650726	1.50333	-0.0684629	0.479722	3.31557
0.0511734	-1.41434	-1.26706	-0.403121	1.84529	1.36287	0.781919	-0.590911	0.785818	1.62009
-1.57047	-2.607	-1.60142	0.609082	0.803531	-0.0211366	2.09884	-0.226386	1.00004	2.56816
-1.89378	-3.52568	-1.26661	-1.95147	2.47795	0.70483	0.792172	0.978017	0.937146	2.51628
-1.20497	-2.37444	-1.36208	-1.53095	1.97982	0.483906	-0.276415	3.13917	1.02376	1.11311
-1.86595	-0.797945	-3.29084	-2.1209	0.525391	0.812762	0.533973	1.03837	2.75002	3.2454
-1.71525	-1.73753	-2.23747	-0.839823	0.969913	-0.557489	-0.864155	1.63488	0.933677	3.95085
-1.7235	-2.73327	0.809012	-1.844	0.0291167	1.07888	0.682843	1.58999	3.30018	0.765134
-1.164	-0.456641	-1.40215	-1.09988	-1.15594	0.067338	0.822438	-0.653473	0.466984	1.584
-1.24119	-1.11509	-0.0408825	-1.47367	-0.447655	-0.391386	1.96542	2.10858	3.61946	2.77868
-2.87728	-2.86779	0.677162	-2.33462	-0.0319231	0.0177917	1.53098	0.712308	-0.277345	2.94857
-3.44088	-0.767747	-0.867413	-2.18003	-1.57646	-0.587052	-0.670408	-0.105408	1.9324	2.11178
-2.25418	-0.600156	-1.86403	-0.815413	0.210989	0.962866	1.66676	1.0152	1.72807	2.93453
-2.78191	-2.43751	0.110164	-1.54109	-0.0887148	-1.1641	0.402682	1.91341	1.50237	2.48985
-1.90457	-1.07855	-0.858051	-0.531967	0.273921	2.434	0.558168	2.07308	2.23845	1.62674
-1.93925	-1.78888	-0.612521	-0.991024	0.236908	-2.0115	1.42299	-0.0180986	1.32648	2.80722
-1.98347	-1.82281	-0.960201	-0.812018	-0.309102	-0.799993	0.227217	2.13001	3.25625	3.3833
-3.11647	-1.91907	-1.37633	-1.84577	-0.317419	-0.259379	2.05981	0.678292	3.47886	3.24259
-2.18658	-2.05682	-0.709451	-0.44431	-0.474898	-0.875293	1.18344	0.799999	0.186193	1.62061
-1.50766	-2.68068	-1.20595	-1.64563	-0.587973	-1.70136	1.40661	0.599382	2.13843	3.36324
-2.08451	-2.29736	0.533245	-0.962209	-0.493929	0.986375	0.788624	2.59365	2.54467	1.7905
-1.5827	-1.21523	-0.864206	-0.354183	0.738473	0.785923	2.87613	1.80257	1.69812	3.26972
-2.95543	-1.41409	-1.59568	-3.35825	0.780157	0.655665	1.18519	0.563753	2.86519	2.6264
0.0657833	-3.47116	-0.855925	0.505971	-0.796604	-1.40661	2.19452	0.904365	3.84333	4.85551
-2.83017	-2.88058	-1.12409	-2.31129	-0.25317	0.898802	0.148792	1.41039	2.26082	2.81871
-2.2791	-0.377151	-1.79554	-2.26805	0.674695	-0.80091	0.907731	0.942324	2.19112	0.837652
-1.98665	-2.69469	-1.10033	-0.779302	-2.08089	-0.214969	0.250847	0.642401	-0.411182	2.64274
-1.3782	-2.5998	-0.682528	0.428438	-0.185225	0.455304	-0.358898	2.04472	3.16464	0.548551
-0.876588	-1.69473	1.09182	-1.85133	-0.600005	-0.636989	1.95937	-1.02711	3.5631	1.77099
-0.611221	-2.66134	-0.193315	-2.07612	-0.471926	-1.20712	1.80635	0.0386762	1.39766	1.90204
1.03086	-1.17542	-1.63964	0.260227	-0.730958	1.0254	1.41572	1.8742	2.61042	3.05056
-1.34542	-2.05119	1.24715	-1.48992	-0.195756	0.696321	0.490507	0.498089	0.774479	2.14216
-2.7256	-2.86777	-1.27198	-0.535905	-0.834715	0.627823	1.08364	-0.067768	2.44271	2.18117
-2.13598	-2.79727	-0.790434	-0.556467	0.220177	-1.43679	0.136791	-0.529545	1.40511	0.7611
-1.71732	-2.8261	-2.13401	-1.27489	0.379939	0.0766107	0.914076	2.29946	2.02085	3.68932
-1.37892	-1.04388	0.0176823	-1.5184	0.228223	-0.0424894	3.62462	-0.108079	3.30144	2.45062
-2.70584	-0.807314	-2.08291	-0.07702	-1.03031	-0.452435	0.868944	0.290994	1.48047	2.37897
-2.23794	-0.844712	0.484488	-3.18155	0.0727633	-0.385065	0.425641	1.87458	3.76227	1.35487
-1.56183	-0.877672	-1.86875	-0.0635158	0.302811	2.82592	1.36631	1.14236	2.88539	1.62007
-2.99702	-2.10679	-1.83937	-0.742573	-0.165208	-1.04717	-0.0418309	1.39435	1.54291	1.15446
-0.548571	-2.61804	-0.705332	-0.689372	0.0290948	0.982585	1.38483	2.52036	1.96452	2.62453
-4.0372	-3.94259	-1.16357	-1.26436	0.0807212	-0.755105	2.84929	-0.562417	3.30269	0.721486
-4.50644	-4.11416	0.745809	-1.9605	1.32944	0.472689	1.31962	3.43303	2.19957	2.4135
-2.41164	-0.721472	0.0113369	1.79882	2.14895	0.647419	0.353532	1.15166	1.66022	2.5665
-2.44223	-1.67647	-0.0837276	0.762061	-0.561608	-0.389148	0.923822	-0.996126	3.37246	2.40751
-2.10999	-1.99145	-0.523968	-2.64766	-1.51974	-1.09051	1.16515	0.938804	0.82463	0.773665
-2.1682	-2.17418	-0.817927	-0.815423	1.19799	-0.94201	1.2612	1.23359	3.96228	0.928376
-1.53884	-3.17598	0.681127	-0.485666	-1.67138	-0.563352	1.97411	0.640152	3.12444	4.50735
-0.989873	-1.07998	-0.373264	-0.957825	-1.06211	1.72858	2.51676	-0.379617	-0.0717426	0.980061
-2.19506	-1.19461	-0.966299	-0.321679	-1.39163	0.476779	1.34021	1.15088	0.755098	2.39255
-2.70134	-2.53722	-0.672721	-1.95452	0.0839688	0.335792	1.43396	-0.821502	1.2518	0.991403
-1.84374	-2.19022	-0.143941	-1.33202	-1.95662	-0.886227	0.747989	1.64583	3.23637	0.992942
-2.44874	-2.67245	-0.109715	-1.42743	-1.60312	-0.808581	0.402921	0.0856091	3.58342	1.74072
-2.55749	-1.06083	-2.37533	-0.109505	-0.117423	0.496357	1.30973	2.03196	1.59449	4.1987
-3.94332	-1.64751	-2.68777	-0.220696	0.913355	0.129632	1.08663	0.221537	2.10541	2.21888
-2.23644	-1.27219	-1.94437	-2.5074	-0.115772	0.208325	0.45265	-0.42876	0.963308	1.91889
-1.48493	-4.78253	-0.426345	-0.950502	-0.259961	0.10858	1.39211	0.987417	2.14498	4.01163
-1.41535	-1.67573	-1.8626	-0.207771	-0.00830369	-1.14651	0.867877	-0.948176	1.39864	2.20611
-1.97814	-2.46867	-4.28208	-1.66804	-0.957099	0.191667	-0.790513	1.70072	1.41037	3.68195
-1.14672	-2.41303	-1.79234	-0.931559	1.92969	0.653433	-0.294115	1.56454	2.37597	0.0455465
-0.165282	-1.43562	-1.75425	-0.222066	-1.00436	-1.56146	0.941089	2.70561	3.1744	2.14938
0.137828	-2.78553	-0.633076	-1.30495	-1.04825	-1.02199	0.738631	0.732627	1.01977	1.09884
-3.75593	-1.28521	-0.142088	-0.477011	-0.0532215	2.37945	2.09756	-0.0444058	2.24558	1.82065
-1.1473	-1.96464	-1.38427	-0.836078	-0.955631	-1.84227	1.61582	1.40711	1.67516	3.45495
-3.53879	-2.4479	-1.24696	1.03749	-2.1698	-0.0892371	-0.412765	1.21563	0.635577	1.89119
-1.38201	-2.18418	-2.06826	0.306465	0.27347	-0.502494	1.70229	-0.178446	2.80683	3.41876
-2.11599	-2.17546	-0.919855	-1.68658	-0.590134	0.183013	1.56402	0.986169	-0.353544	2.80983
-2.93391	-2.53302	-0.892612	-2.12305	0.417894	0.187913	0.553743	1.58605	0.798833	-0.175593
-3.42656	-0.23204	-0.255892	-1.93916	-2.82266	0.520939	2.55743	0.488873	0.793194	3.00509
-2.47537	-1.52239	-1.35407	-0.562563	-0.258487	1.90156	1.94701	1.58321	0.846703	2.1499
-3.02189	-1.20547	-0.652799	-1.44472	0.152303	0.964566	2.3477	0.588343	2.7872	0.814178
-3.87316	-1.07938	-0.744201	0.250717	0.286119	-0.695982	1.91124	1.93969	2.35356	3.15388
-2.03537	0.110605	-0.792175	-0.721077	-0.426808	-0.966699	0.649187	1.00474	1.03118	2.46559
-3.30653	-1.92362	-2.37079	-0.0313558	-0.719107	0.498274	1.15965	0.158631	3.12135	0.956614
-1.63277	-0.767101	-1.9145	-1.32694	-0.62412	-0.224917	-0.0614228	0.539871	0.187946	2.02899
-2.42286	-1.91354	-0.549421	0.0854451	-0.075928	-0.0545926	0.334465	-0.729308	3.13422	0.623523
-4.14247	-2.83017	0.227905	-1.32099	-1.21004	0.0741857	-0.029647	0.911811	3.03238	1.79883
-1.54838	-0.895826	-0.50329	-1.68016	1.62613	-0.49119	0.157896	1.8814	1.55931	2.10492
-2.28174	0.0563555	0.821525	-0.666917	2.00607	-0.798317	3.55444	-1.08247	1.47038	1.68259
-0.239751	-2.06065	-1.46758	-2.72726	-0.755979	-1.15229	-0.0849472	1.23498	1.43128	-0.140368
-4.4135	-3.77757	0.102358	-0.164634	-0.067052	0.943643	0.479964	0.380945	0.736387	1.84195
-2.77786	-0.884159	-2.44545	-0.616192	-0.904008	-0.545961	-0.730055	1.17416	1.31181	1.68706
-1.68973	-4.09425	-1.27413	-0.217938	-1.6581	-2.05829	-0.185389	1.60136	1.97461	2.3752
-2.22877	-0.386639	-1.53888	-3.56204	0.295553	-0.236482	1.34569	2.45439	0.557901	3.77652
-2.3748	-2.74997	-0.0509242	-2.07658	0.651198	0.106856	1.15408	-0.230993	3.09478	2.02794
0.0546241	-1.94659	-1.44466	-1.24887	0.753124	-0.0950895	0.964176	1.09993	1.05274	3.62192
-2.47916	-1.64983	-2.87411	-1.87205	0.250557	2.61933	0.0265861	0.208161	3.17128	0.37704
-1.98284	-2.42914	-1.79809	-0.669129	-1.35505	-0.969524	0.646609	1.03038	0.839487	-0.0712613
-0.791544	-0.884298	-2.03595	0.689256	1.06437	0.206413	1.18866	0.723127	1.96842	3.21867
-1.15914	-2.10289	-1.33276	-1.10549	-0.0169334	-0.187679	-0.175204	0.566781	1.87012	2.1695
-0.8531	-2.0497	-0.785878	-2.90698	-0.665179	-1.64776	2.10332	0.271433	1.45329	1.29177
-1.53336	-0.966313	-0.30244	-0.87473	0.0199609	-0.546797	3.41243	1.33237	2.81456	1.90659
-1.19116	-0.210245	-0.264695	0.45227	-0.431121	-0.856365	2.87404	1.52299	2.11672	2.57644
-1.54872	-3.68406	-2.18467	-0.597766	-1.02298	1.6	1.66973	-0.485593	2.97244	2.53147
-3.16017	-0.649893	-0.603346	-0.537442	-1.3204	0.382407	1.79176	2.25099	2.34357	1.15224
-2.33128	-1.61346	-1.08176	-1.16425	1.01455	1.77654	2.63758	1.35151	3.53045	2.60022
-2.85146	-0.999119	-2.09729	-1.24682	-1.78999	-0.0637884	1.93014	0.938704	2.41106	2.10164
-2.38483	-0.541892	-0.42406	-0.592482	0.48079	0.527823	0.914385	2.72073	3.01018	2.76485
-2.53223	-0.881867	0.332111	-1.34594	0.628438	-1.33087	-0.0659938	0.293086	1.70545	0.21791
-1.3256	-2.72239	-0.0317626	0.0388141	0.680251	-0.400808	1.29897	-0.0873714	1.8625	3.70616
-0.901004	-2.90163	-1.02804	-1.01109	-1.34135	-0.617333	3.29272	0.323165	2.06326	3.29333
-2.82247	-1.27829	-1.85289	-1.31656	-1.36708	0.00792803	1.8341	2.80438	1.37521	2.98283
-2.62534	-2.59384	-2.62909	-0.321188	-0.197013	-0.963011	1.39975	0.204647	1.4066	2.38676
-2.3439	-3.00017	-0.841409	-2.42391	0.332305	0.0679855	-0.487118	0.613516	1.9902	0.944847
-0.955006	-1.39149	2.00463	-1.27695	0.698765	1.43372	1.52191	0.763657	2.86459	0.818299
-2.06933	-2.10839	-1.76987	-0.61463	-1.14169	-0.867901	0.998479	0.062801	1.91373	1.33528
-1.54984	-0.234665	-0.266898	-0.549517	0.474327	-0.187003	-0.294146	1.97625	1.30078	1.99113
-1.12903	-2.50846	-3.11644	-0.20235	0.231131	1.52045	-0.368765	2.26551	1.18618	2.68709
-1.22258	-2.11877	-3.30449	1.10201	-0.750241	-0.515221	0.910291	0.56493	3.30686	0.354413
-2.199	-0.133529	-0.571103	0.205401	-1.89092	-0.233706	1.99465	-0.608568	2.31871	3.04229
-2.41894	-2.47918	-0.559965	1.50904	-0.732842	-0.00244714	0.468822	0.60171	3.23259	2.77587
-3.95211	-3.40233	-0.947361	-1.2952	1.70416	-0.804493	-0.0512174	1.13846	1.54281	1.6204
-1.54888	-2.69492	0.216625	-1.46219	-0.681304	0.0306718	1.68544	0.794039	1.18929	0.305084
-1.48459	-3.11487	0.633709	-0.0767258	-0.943804	0.671095	1.18701	-0.72015	2.41821	3.24581
-2.76731	-1.32543	-0.428634	-1.12401	-0.802934	-0.0358129	2.22922	0.174355	1.45209	2.45996
-0.539108	-1.40753	-1.33824	-2.134	0.562736	-1.12804	-0.225019	1.08258	1.30896	3.45756
-0.802169	-0.295406	-1.10427	-0.559129	2.04309	-0.948179	0.768119	1.73637	2.82014	2.25356
-0.959911	-2.91844	-1.05809	0.193548	1.35553	0.269148	1.00463	3.87639	0.222857	-0.0335219
-2.10534	-1.3698	-2.04752	-0.0580633	-0.795726	0.732198	1.12309	0.975693	1.15781	4.23843
-2.41485	-1.54805	-1.20635	-0.292922	1.33734	-0.154705	2.08159	0.728647	2.85128	-0.0448075
-3.57916	-2.82863	-1.63872	0.958895	0.183339	1.43719	0.491656	1.62218	2.87152	2.49004
-1.47112	-4.23709	-1.99055	0.43172	-0.148033	-0.211755	-0.178607	0.27802	2.86099	1.27567
-3.10771	-2.01772	-0.73048	0.316802	-0.0020289	-1.80367	1.3848	1.52802	2.27712	0.566752
-3.71939	-1.94288	-1.62534	-3.86463	0.230797	0.364296	1.65593	2.23881	2.70959	1.24252
-2.79955	-2.29159	-0.27238	-1.35283	-0.30899	0.316256	1.27735	1.7501	1.33196	0.676327
-2.25898	-1.81071	-1.07552	1.22191	-0.0806227	-1.12127	1.08778	1.91752	1.76624	3.30612
-2.56379	-1.91031	-1.07009	-0.0726612	-1.52797	-0.455172	0.523923	0.68742	1.08023	2.18072
-2.60116	-1.44393	-0.931611	0.960659	1.15758	-0.351147	2.69132	0.41646	3.37168	2.53211
-0.306191	-1.80313	-2.78188	-0.58308	-0.933118	-0.161033	0.778546	3.07715	2.84635	2.03459
-1.83013	-3.16401	-1.08292	-0.928418	1.50601	1.90006	1.65734	0.98705	0.835815	1.23932
-1.30663	-2.75807	-2.38801	-1.81949	-0.830677	-0.685124	1.1333	3.10484	2.40056	0.946228
-2.80885	-1.44256	-1.59502	-0.346178	0.766418	-0.860983	1.43474	0.709272	2.70547	2.20835
-1.81896	-0.892825	-0.0959236	-0.722906	0.938609	0.811442	1.55088	0.842225	2.87759	3.97061
-0.557123	-2.53968	-0.264322	-1.95112	-0.135622	-0.449194	0.788928	1.10529	2.79221	1.5904
-1.87162	-0.239585	0.176702	-2.292	0.180201	1.30968	1.13118	3.22932	2.2178	0.717713
-1.03346	-1.28695	0.198588	0.255322	-0.587062	-0.0858513	3.04744	-0.576264	1.60404	2.16515
-0.693794	-2.6046	-0.445868	-1.3313	0.482901	-1.44713	0.713179	0.528721	2.56352	4.05595
-1.36342	-0.590747	-2.00179	-0.549977	-0.158593	-0.70193	1.4888	-0.788714	0.760221	1.34089
-0.379088	-2.80618	-0.645974	-1.27799	0.845228	0.808829	1.51361	1.26109	3.18045	1.08503
-2.25167	-1.61728	-0.889284	-3.48364	-1.2474	-0.862004	1.4118	2.66689	1.52485	2.94003
-2.289	-2.39182	0.812939	-1.38506	0.323792	-0.145301	0.36333	0.706399	1.88861	2.79745
-1.316	-2.35341	-1.97417	-0.878471	-1.17951	-0.245405	-0.378941	1.50874	3.46945	2.10721
-3.78791	-1.63815	-0.239087	-1.26701	-0.834205	-0.221229	-0.232857	-0.692849	2.13478	0.348086
-2.42449	-2.73153	-2.25594	0.785779	-0.651575	0.207314	1.2806	0.113912	2.86429	2.94881
-3.56574	-0.986178	-2.15301	0.281235	0.247178	-0.404479	1.09278	0.220919	3.53135	3.47503
-4.22711	-3.69933	-0.0783746	-1.28153	1.13759	-0.116074	0.509985	0.679083	1.21769	2.16166
-2.27585	-0.771044	-2.47107	-1.65768	0.36873	-0.599342	1.39798	0.462778	0.379401	0.986526
-0.690294	-3.15498	-1.31983	-0.0692962	-0.606881	1.68377	0.967007	2.13981	1.7055	-0.0250257
-2.17763	-3.51046	-0.999769	-2.81473	-0.465484	-0.124616	1.16594	1.45978	1.43343	1.10004
-0.988793	-3.47656	-0.86698	0.228973	2.61237	1.29879	2.0092	1.04015	2.41165	2.83705
-2.1432	-0.967016	-1.31528	-2.33759	0.256584	-0.62941	1.16836	2.88093	0.856278	1.23151
-2.22241	-0.52984	-1.80014	-1.56831	-0.368991	0.406906	1.60024	-0.0280351	-0.164106	2.46947
-2.87001	-1.63081	-1.27678	-0.623131	1.19186	1.80126	1.13759	-0.650929	1.30142	3.19853
-1.14672	-2.13971	1.00356	-0.810758	0.20857	-0.317855	2.07263	-0.714832	2.51465	2.81352
-0.613686	-1.45187	-0.0598155	-2.70148	0.463299	0.418037	-0.722933	0.594115	2.12143	2.18903
-3.63745	1.9586	0.442542	-2.84437	0.242562	0.346336	3.57567	2.0369	2.09149	0.789641
-1.35136	-1.89266	-0.609784	-0.964655	0.116414	0.421819	0.876429	0.102398	3.67026	1.57466
-3.39881	-1.91823	-2.74176	-1.85814	-0.984906	-0.214152	-0.305388	-0.265971	2.56477	0.371453
-2.45994	-1.35565	-0.441122	-1.42967	0.375451	0.953027	0.635493	1.13586	1.72537	2.05782
-1.62833	-0.146991	-1.03342	-0.351628	1.77838	0.853304	-0.368564	-0.751864	3.05662	1.47836
-1.85775	-1.48649	-1.47871	-0.8118	0.178916	0.490721	1.32116	0.262008	0.376202	3.49925
-1.62754	-2.14849	-1.14777	-1.6872	-1.29816	0.290033	0.804003	-0.72305	2.80234	3.61682
-2.1834	-0.899	-1.03611	0.677769	-1.1797	-0.575215	1.28978	1.89616	2.00214	4.66933
-1.21997	-2.62944	-1.66705	-0.828317	-1.39206	-0.125941	1.95683	-0.115306	1.52318	1.57916
-3.11344	-2.06741	-1.07118	-1.67325	-0.444538	-0.595169	0.367276	0.786242	1.87226	2.87878
-0.83856	-2.02753	-0.9056	-2.66368	-0.273274	-0.381072	-0.330274	1.00905	2.73614	1.86064
-0.253565	-2.77507	0.624136	-0.664281	0.675254	0.48334	0.410654	2.55083	0.603005	-0.402843
-1.85836	-4.5163	-0.73593	-1.6049	-1.48095	-0.328634	-0.0508089	1.73168	1.06887	1.36916
-2.59567	-2.30912	-1.12173	-1.26334	0.383431	-1.11141	0.299898	1.14618	2.76247	0.704988
-1.48906	-0.289338	-2.10444	-1.68208	0.0317276	-0.439389	2.56034	0.889501	3.64148	0.650426
-1.96506	-0.546082	-1.97038	-1.64486	1.02495	-1.99757	-0.0333335	0.627439	1.15882	1.88677
-1.33832	-1.01365	-2.44719	-1.52699	-0.693205	0.0305831	1.82989	2.84508	1.29399	0.686134
-2.46615	-0.615009	0.220589	-1.60695	-1.80648	-0.271893	-0.379898	-1.71949	1.25599	1.59574
-3.07296	-1.50484	-1.40263	-0.781686	-1.26804	-0.170028	1.00069	1.16255	1.10793	2.64479
-2.95206	-2.51815	-2.77823	-0.885297	-1.37786	-0.965	0.959391	-0.118048	0.3526	1.95549
-3.4614	-2.51635	-0.450411	-1.73062	0.935754	-0.678891	1.73445	1.32465	2.26276	2.09656
-1.64888	-2.06877	-0.536054	-1.74276	0.385244	-0.947923	0.630601	1.58311	2.2565	3.07458
-3.34776	-0.52926	-0.741451	-1.69064	-1.50244	0.578507	0.566421	1.90473	1.22767	2.76502
-1.66278	-0.991935	-2.04361	0.42094	-0.00289506	0.50055	1.9548	1.13305	3.55941	2.4996
-1.21477	-2.66487	-2.02989	-1.82216	-1.34272	-0.041767	-0.0706375	0.407955	1.36738	3.5506
-3.94505	-2.91542	-1.6499	-0.581154	-0.4697	1.81792	1.70732	2.25046	3.36595	1.62732
-0.774844	-3.05355	-2.89037	-1.15018	-1.40747	-1.22487	1.80167	1.66952	1.4737	3.17094
-1.18396	-2.61241	-2.14242	-0.923699	-0.911396	1.90162	-0.448546	3.27475	1.93973	2.46657
-1.60689	-3.82392	-0.629155	-0.959172	-0.54725	-0.708035	-0.41204	1.69138	3.73094	2.39864
-0.832925	-2.03967	-0.139141	-1.06021	-2.45663	0.406202	0.75329	-0.159068	2.57271	1.83729
-1.11417	-1.81014	-0.717633	-1.38262	-0.385773	0.290797	3.07726	0.171373	2.49196	2.10654
-1.20194	-2.10193	-0.603156	-0.665808	-0.993111	-1.09093	0.94762	0.456319	2.2654	1.1921
-1.25664	-3.50957	0.376817	0.325632	0.18321	-1.08659	2.02487	1.53066	0.877507	1.86489
-3.08071	-1.27453	-0.831134	-2.08262	0.918492	-1.38917	1.98414	0.501748	0.708656	2.6197
-2.03918	-2.22875	-2.60742	-1.43917	-0.625277	1.12285	0.720853	1.23896	1.66109	0.968548
-2.17961	-1.49827	-1.41517	0.483639	-0.514441	1.65728	1.5731	0.640868	1.94712	2.43179
-2.59334	-1.48969	-3.03392	-3.05283	-0.98842	-1.78481	0.0403222	-0.206868	3.96412	1.34439
-2.91579	-2.40725	-1.17312	0.386975	-0.5676	-0.546244	-0.3454	1.98149	1.61516	1.85273
-1.01505	-0.928748	-1.4655	-0.22671	0.319229	-1.55359	0.907172	1.66579	0.722032	1.99125
-3.09715	-1.16137	-1.97243	-2.58898	0.801007	-0.305939	0.272343	-0.959643	1.24501	1.30206
-3.03918	-1.26698	-0.971791	-2.21258	0.313771	1.30803	-0.158824	1.87923	1.71212	1.19682
-3.89881	-3.11711	2.56061	-1.05452	-2.62071	-0.531804	1.66059	1.70862	2.00526	1.21822
-2.50897	-2.16649	-2.77026	0.0613858	1.09447	0.570024	2.57409	1.03058	2.00108	2.45119
-0.576386	-1.096	0.154121	-1.68848	0.249217	0.638864	2.01622	0.865236	2.03028	3.37235
-0.424532	-0.793392	-0.842731	-0.701236	-0.239263	-1.01049	1.37518	1.99518	1.47986	2.49973
-2.28286	-2.26633	-0.921659	-1.90202	-0.48148	0.921625	2.17357	-1.48372	2.38463	2.52694
-0.931028	-1.95963	-1.00318	-0.18996	-0.264283	0.152292	1.08974	1.12878	1.54813	2.38818
-2.15699	-3.3352	-0.819551	0.782201	-0.276407	0.198679	1.43841	0.829539	0.893266	1.84266
-2.10646	-4.791	-1.89787	-2.79875	-0.659726	0.15388	0.124183	1.16601	1.8037	-0.406066
-2.45612	-2.97989	-0.139748	-2.08533	-0.368599	0.0643963	1.88052	-0.275662	1.07004	1.29004
-1.30743	-2.47867	-0.305602	-1.94143	-0.283348	0.852942	0.400919	1.9523	2.19559	2.69451
-2.32905	-0.652895	-1.37945	-2.71901	1.44649	-0.538175	2.58044	0.980098	1.9228	0.956268
-3.04907	-1.68334	0.889452	-3.22881	0.511027	-0.0375187	0.715612	1.15249	0.223044	1.89379
-3.89527	-1.91027	-1.03943	-2.48979	0.482066	0.777781	0.954077	2.12523	0.943062	2.49133
-1.58973	-1.14013	-0.819521	-0.552275	1.62442	0.140082	-0.266548	0.423691	3.04919	2.86963
-2.89868	-1.68034	-1.77722	-0.567434	-1.31902	0.171312	2.00576	0.897174	2.41247	2.52654
-1.68185	-2.01923	0.35547	-1.73008	-1.75806	-1.3373	1.59055	0.539834	0.381192	2.42774
-1.84998	-1.53647	-0.43537	-0.356203	-0.222308	0.581578	0.941864	-1.28627	0.209096	1.33434
-1.60212	-2.99601	0.693003	-1.19385	0.0761994	1.0377	2.98145	2.89621	2.22104	3.32852
-3.19586	0.50598	-0.497734	0.0512578	1.03061	1.65007	0.841311	1.69749	1.52138	1.32285
-0.0802077	-3.39169	0.116964	-1.73008	-1.08255	0.245047	2.36384	0.274458	2.42755	1.04864
-1.54978	-1.37256	-0.417816	-0.444306	-0.326353	0.933766	-0.330615	0.900287	1.73957	2.15184
-1.24866	-1.8596	-0.994189	0.322416	1.03583	0.292586	0.823756	1.00614	2.28807	2.31547
-2.92687	-2.18242	-0.444062	-1.61419	0.13342	1.72713	2.8937	0.876609	1.67114	0.668535
-2.49113	-1.86563	0.0595577	-1.41714	-0.804434	0.18409	1.71603	1.11898	1.3232	1.0365
-2.26837	-2.13168	-1.53593	0.284261	-1.46584	-0.336578	0.299996	-0.288582	2.68392	4.01305
-0.981448	-0.769442	0.340148	-0.916328	-0.909723	-1.59913	2.2288	-1.02315	1.58836	2.46825
-3.1811	-2.45993	-1.033	-0.40886	-0.501978	-1.57956	3.15524	2.76288	0.721278	0.802385
-2.7908	-0.776278	-1.3522	-0.834279	0.944009	0.149251	1.40405	1.88803	3.33897	2.29265
-2.05937	-0.551011	0.460897	-1.18107	-0.526335	-1.52671	-0.425808	-0.530099	0.486291	4.4166
-2.47758	-1.974	-0.0937632	-0.994564	0.70329	2.14519	-1.07924	1.62679	1.42689	1.89943
-3.3487	-0.697464	-1.7189	0.152283	1.84023	-2.11407	1.45279	1.78066	0.807789	2.50016
-2.36261	-3.48516	-0.104661	-0.455362	-0.390081	-1.6582	2.10474	1.52895	0.47462	1.72639
-2.59246	-4.30491	-1.85872	-0.934516	1.23401	0.594891	0.809412	0.695269	2.00987	0.360285
-2.03182	-1.88751	-0.533228	-3.53956	1.08715	-0.0109026	-0.183248	2.11581	2.72172	2.77147
-1.71192	-0.501892	-0.0759616	-1.86844	1.83698	-2.39443	1.01856	1.41085	0.863065	2.28228
-2.30098	-1.19254	-1.06167	-1.88875	-0.62722	0.266704	3.08172	-0.517104	3.32762	2.66051
-1.68776	-2.19332	-1.0546	-1.21956	-1.03364	0.620601	0.717825	1.37849	2.21859	1.42071
-4.0768	-1.0525	-2.92741	-0.274961	0.0970003	-0.827806	1.54553	2.41891	1.41716	2.20482
-2.50397	-1.98204	0.413997	-0.756359	-1.36082	-0.433451	0.243226	1.69593	2.55681	2.27205
-3.27046	-1.717	-0.95087	-1.40757	1.62059	-0.637137	2.03015	1.38994	1.49134	2.76645
-1.89197	-1.97058	-0.780296	-1.57092	-0.0801839	2.20536	1.66339	0.431814	2.88382	1.56707
-2.13479	-0.950782	-0.904344	0.0871806	1.17376	1.653	1.64892	0.628594	1.28222	2.6112
-1.03378	-1.27408	-1.3577	-1.36692	0.00403351	-0.480224	3.33121	-0.190081	2.8335	3.01837
1.32108	-2.60023	-0.98484	-1.04368	-1.91669	0.437331	1.18423	0.224718	1.80883	2.56979
-2.37952	-3.0148	0.464952	-0.138318	-0.22889	1.98039	1.92736	3.44876	1.87561	3.89257
-1.56401	-2.68749	0.466116	-0.577565	0.274049	0.169162	1.70286	-0.0698681	0.854014	2.19377
-4.69836	-3.21334	-2.49033	-0.48564	1.72806	0.73891	0.39082	0.473399	3.62171	2.78622
-1.92775	-0.990213	-1.7733	-0.912444	0.46976	-1.46554	2.86153	2.81484	1.95871	1.1253
-3.55694	-2.61244	-3.15883	-0.945221	0.634312	0.220984	0.252836	1.01735	1.52853	3.76662
-2.13935	-2.72854	0.285726	-1.58832	-0.0320803	-0.416368	2.63325	2.01284	2.76153	2.88225
-1.46884	-1.996	-0.978932	-0.253755	-0.394942	-2.0293	1.24669	0.140929	1.70367	1.50027
-1.67873	-2.72521	-1.50509	-3.09303	-1.61301	0.581675	0.188331	0.681879	2.84633	2.06134
-0.463464	-2.00038	-1.01567	-1.71113	-1.08113	-0.295186	0.267172	1.97673	3.55221	1.56836
-0.70645	-2.439	-1.31363	-0.542261	-0.561659	-0.338395	1.61426	1.41429	3.25752	1.65677
-1.40996	-2.67938	-0.186744	-1.36154	1.77164	-0.21123	2.11085	1.32665	1.82724	0.884227
-2.95091	-2.70435	0.193846	-1.16821	0.535911	-1.13193	3.42257	3.31608	2.20631	2.83343
-2.04587	-2.21873	-0.883856	-2.59725	-0.501852	0.480374	1.17995	0.757297	2.58095	0.67604
-0.460793	-3.1487	-0.78793	-3.79915	0.596783	0.826387	-0.341746	2.22941	2.11294	2.55298
-3.09034	-0.299812	-0.976001	-2.12441	0.79338	0.79863	1.31665	0.667292	1.36845	2.11453
-1.39122	-3.88141	1.0053	-1.06842	-0.537147	-0.0443836	2.11285	-0.0434686	2.43203	2.35665
-1.50273	-1.76267	-0.228685	-1.93091	0.424028	-0.761024	-0.0363774	2.49268	2.76879	0.874728
-4.14444	-2.36956	0.178246	-1.44058	-1.46435	0.0387421	1.0356	2.55741	1.42464	1.89336
-2.01745	-1.2686	-2.80538	-1.18934	-1.15105	-0.0679444	1.16402	-0.763865	1.98803	1.60088
-1.0455	-1.90425	-0.206167	-2.71988	0.250127	-1.1646	0.980188	0.779008	1.88081	1.97175
-0.966549	-2.14627	-1.28282	-1.26588	0.177483	-0.862885	0.501654	1.2029	1.52562	1.45773
-2.8575	-2.93418	-1.93656	0.0888894	-0.454533	0.869972	0.619006	-0.770503	1.82053	1.9483
-1.45735	-3.95817	-2.60924	-0.782903	0.122395	0.330389	-0.801434	0.571348	3.12287	1.24465
-1.32219	-3.10657	1.53709	0.147085	0.397214	1.19546	-0.563739	2.88026	0.987188	1.07302
-2.35922	-1.49462	-1.47015	-1.91591	-0.197742	-0.668803	1.84185	0.140606	2.2863	1.40331
-0.782059	-3.94068	0.114503	-2.93385	-0.759398	-1.05032	1.45947	0.511596	2.16197	3.37474
-2.80618	-1.95094	-0.121342	-1.2459	-1.46145	-1.09602	1.28101	-0.471143	2.16897	1.59612
-2.59609	-1.13838	-3.16656	-0.712435	-0.0745333	-0.202892	0.454067	1.37351	2.68371	2.59909
-4.08639	-1.6382	-1.55288	-0.762692	0.386816	-0.274049	1.47394	2.14897	1.82739	3.76811
-1.57408	-1.95092	0.325872	-2.11782	-1.06697	0.504709	-0.675415	1.06825	0.741738	0.46262
-0.897763	-3.22957	0.0378468	-0.895896	0.483552	-1.35154	0.836178	1.28792	1.62594	3.69167
-0.891383	-2.70292	-1.98897	-2.67763	0.666403	1.11201	-0.251761	0.48216	1.18437	2.70287
-1.27445	-2.3242	-1.00138	-0.214004	0.91201	0.455811	2.10672	2.27858	1.78725	2.5067
-1.18566	-1.21953	0.156169	-1.67676	-0.430927	-1.97087	2.07989	1.61493	0.676553	2.75661
-3.46405	-2.15449	-1.02901	-0.676998	0.86432	0.815692	0.527468	0.331123	1.38501	2.37562
-2.09243	-2.23788	-2.10475	-0.91817	3.39194	0.212732	1.34208	1.1036	1.33643	2.14093
-2.75566	-0.148562	-0.140763	-1.23846	0.447077	-0.18123	-0.0945459	1.46249	1.70017	1.93241
-1.7909	-0.444984	0.303241	0.0949554	-0.378378	-1.01732	0.766087	1.25672	0.592921	1.21899
-2.56915	-3.0618	-1.22494	-1.32888	0.704134	-1.06629	0.654948	-0.0295927	2.17114	2.29256
-1.86775	-2.56324	-2.31265	-1.69539	-1.72008	0.000591085	2.93888	1.40295	1.81319	2.23327
0.390146	-1.75458	-0.327689	-1.7103	-1.20019	-0.7032	2.06099	2.65997	-0.349478	1.55126
-0.847401	-2.22424	-0.802759	-0.95236	-0.388514	0.128122	0.832366	0.43359	1.11476	1.89813
-2.32606	-2.03091	0.0513752	-1.71565	0.852635	0.468989	1.45333	1.65104	1.20328	2.9783
-1.64428	-1.15041	-0.421539	-1.42072	-0.834012	0.675373	1.40186	2.06334	2.22503	2.47002
-2.12215	-2.68085	-2.05148	-2.59038	0.0031892	0.44326	1.03779	1.42808	2.331	2.20397
-3.06788	-2.07668	-0.561569	-2.88244	0.873422	-1.27978	0.866712	2.11312	3.50231	1.79449
-1.42704	-1.54205	-2.21363	-2.40947	-0.613523	0.176738	0.998061	-0.650322	1.14068	2.12087
-2.01782	-2.60014	-0.275877	-2.26338	0.697035	0.750715	1.13574	1.80098	2.44667	3.9563
-1.85323	-1.4282	-0.736548	-1.48984	0.615942	1.72904	0.720067	3.19463	2.42841	0.970698
-2.03682	-1.88763	-0.907331	-1.43535	-2.0224	1.08447	2.51885	0.514067	3.01839	0.955465
-2.1505	-1.0845	-0.675067	-0.591957	-0.690037	-0.0660953	2.1742	0.420423	3.19612	1.58163
-2.4382	-1.81446	-2.40729	0.134341	0.136536	0.30279	0.894561	1.56834	4.23903	1.46303
-1.60557	-1.27448	-0.25358	0.466918	0.756929	-0.74798	-0.0147049	-0.554648	1.86846	1.55503
-0.504115	-1.32455	0.111761	-1.54397	-0.151293	1.41335	0.651017	0.979639	0.986919	2.52242
-1.40079	-3.47024	0.805916	-0.805981	-1.85425	0.0301519	2.55654	1.90192	4.78892	1.28954
-1.3936	0.293718	-1.88016	0.960757	-0.704851	-1.33042	-1.28183	1.85087	2.65586	1.34541
-2.83001	-3.01952	-1.56982	-3.46231	-0.832204	-1.49479	0.617455	0.792372	2.57935	1.59633
-2.21465	-0.978752	0.955975	-1.38839	-1.91649	1.51685	2.54397	1.84084	2.13413	1.80842
-1.47525	-2.47712	-2.0182	-1.20684	-0.330615	-2.05207	1.84224	1.2153	0.753385	2.09022
-2.03599	-0.962961	-0.612949	-0.249252	-0.424409	-0.30717	0.873609	1.56561	2.36621	2.45755
-1.32738	0.428877	0.359469	-0.382561	0.849771	-0.547842	1.14274	-0.457212	2.8775	0.816933
-0.994313	-1.64643	-0.865675	-1.68629	-0.481932	0.312369	1.11369	0.29648	2.18397	1.6353
-1.38527	-2.34898	-1.86855	-0.689953	0.378755	-0.0734233	1.35233	-1.30723	2.52336	1.55698
-2.97777	-1.82804	-1.41612	-1.21066	-0.00754763	0.307372	0.362171	0.942435	2.23046	1.49364
-1.50944	-3.39528	-0.490286	-1.75776	-2.00014	-0.159643	0.711079	-0.3376	1.27534	2.59937
-2.52236	-2.36926	-0.0976133	-1.64455	-1.02155	1.57824	1.64721	-0.150383	0.480955	2.48865
-1.73436	-2.26047	-1.6015	-1.82347	1.28987	1.24838	1.67961	1.14466	3.26028	2.4066
-1.5549	-1.90189	-1.383	-2.36931	-0.645624	0.142516	0.451363	1.61727	1.9611	3.47197
-0.939672	-3.71117	0.720814	-2.90159	0.859385	1.12074	3.34122	0.305121	1.17228	2.19284
-0.342875	-0.582326	-1.37075	0.301858	-0.235374	0.316714	0.0757929	-0.251938	0.874588	4.25431
-1.94968	-1.34968	0.211217	-0.606864	-0.273358	0.740799	1.16143	1.14745	3.54985	1.41266
-1.39345	-2.73729	-1.31789	-1.58051	-1.52676	-1.86211	1.75392	2.65422	3.51346	3.50587
-1.83533	-1.22183	-2.09	-3.10509	0.65275	0.0425492	0.950441	0.605108	2.67632	3.23628
-1.69018	-0.948679	-1.6856	-1.32447	-0.340269	1.83887	-0.319326	-0.238785	1.81563	0.312899
-1.905	-1.91925	-0.0983425	-2.32417	0.628625	0.925299	1.29493	2.48355	1.71333	2.00655
-2.7678	-2.36454	0.305918	-1.31486	0.494574	-0.865856	1.58217	0.129153	2.79887	2.7067
-2.45972	-0.294516	-1.05452	-0.885595	1.3102	-2.13815	1.34845	-0.504745	2.16969	2.38071
-1.75949	-2.99943	-0.00458717	-0.489593	-0.923955	2.68244	-0.248266	-0.80935	0.967477	1.33178
-1.6014	-2.192	-2.18169	0.100675	1.69954	0.988779	2.66997	-0.205428	3.84672	3.1963
-5.05376	-1.52015	-1.2861	-0.356358	0.597682	-1.29409	0.963999	1.60881	1.24994	2.82199
-3.5527	-1.42154	-2.02089	-0.407802	0.321055	-2.34091	1.16877	3.36706	2.00827	3.56704
-2.96126	-3.45832	-1.85626	-2.05588	-1.53838	-0.0157996	0.456491	2.8396	0.446884	0.598377
-1.50566	-3.49419	-2.43912	-1.60677	-0.88099	0.624901	1.13698	1.29464	2.40488	2.90187
-2.4467	-1.79562	-0.754923	-1.35474	-0.226464	-2.40604	-1.02573	-0.339533	2.53197	2.50862
-1.38777	-1.25512	-0.0866887	0.848275	1.1851	0.0648523	1.86636	1.79605	2.0502	1.41011
-2.03628	-2.8324	-0.886424	-0.480011	-1.5871	0.0422135	-0.382051	-0.757287	2.08451	3.67902
-0.0761846	-2.60598	-0.762538	-0.820536	-0.613264	-1.43247	1.92297	1.76923	3.5612	2.7355
-0.196411	-2.45252	-1.04126	0.851735	0.100378	0.594752	-0.0831126	-0.372825	1.66499	2.61884
-0.838714	-0.930034	0.118192	-0.776932	-0.422937	-0.940813	0.756777	-1.7142	1.0247	3.15955
-3.04553	-1.64472	0.0174902	-1.02951	0.291939	0.0687035	0.904708	1.32193	1.29951	0.873253
-1.24461	-1.29902	-1.9983	-2.35215	0.399755	-0.845796	0.6516	1.70556	0.178401	3.18013
-2.19894	-1.69804	-2.42278	-2.11436	1.79984	-0.244613	0.572468	1.72513	2.6331	0.701912
-2.39469	-3.17181	-0.374488	0.778162	0.671115	-0.459285	1.8392	2.00517	1.05246	2.81505
-1.01599	-2.55968	1.19881	-2.09962	0.635484	1.3476	1.30735	0.397433	2.21927	3.53303
-0.620242	-1.39755	-0.077802	-0.266249	-1.19542	-0.180515	2.45123	2.36978	1.47068	1.92553
-2.89265	-2.1612	-0.327587	-0.275589	-1.64692	-0.379997	2.31145	-0.831827	2.14458	0.568737
-2.28638	-2.87089	-1.31421	-0.685938	0.152978	-1.08133	-1.24937	2.14232	2.15699	3.91982
-1.49857	-2.47861	-0.0888245	0.62353	-0.637171	0.813358	1.29204	0.780406	3.37532	1.49825
-0.368308	-1.13911	-2.55252	-0.398602	1.64547	0.00419177	0.585357	0.237824	3.21781	1.06386
-2.88019	-2.019	-0.48079	0.270262	0.129733	-0.112649	2.69238	1.43112	2.10767	0.916695
-2.22676	-3.56451	-0.858256	-1.47502	-1.49129	-0.542469	1.64999	0.528527	2.0859	1.36435
-1.06874	-1.05019	-1.20805	-0.711183	0.299443	-0.950242	1.05612	-0.109338	1.26018	0.905069
-1.0745	-2.45699	-0.000856745	-2.05758	-0.26333	1.65426	1.76199	1.95058	0.696422	3.72317
-0.931014	-2.20975	-0.514111	-0.609514	-2.25333	-0.889833	-0.375478	1.84397	2.00658	2.86424
-1.06485	-0.187472	-0.00044219	-0.0126476	0.835315	-0.698591	0.918015	1.55005	2.03112	0.279656
-1.85989	-3.41915	-0.315376	-1.63417	-0.245538	0.0500436	0.690621	2.00716	2.29265	1.8972
-2.3169	-1.35901	-2.33204	-0.0695588	-0.646115	0.654427	0.178691	-1.24495	1.57299	2.29526
-0.780126	-3.13379	-1.89626	0.757154	0.599206	-0.62551	-0.0294768	0.0359357	2.44549	2.9643
-2.19055	-1.76666	-0.721144	-1.3979	1.13005	1.60548	1.85791	2.04872	2.28169	0.772281
-1.565	-1.08958	-0.593179	-1.02121	0.32501	0.65841	0.882559	-0.523551	3.74487	1.81293
-2.94844	-2.42348	0.572685	-0.592784	-0.38506	0.599687	0.634902	0.691892	3.02499	0.836468
-0.992034	-1.60767	-1.62028	-0.186454	-2.15412	-1.82571	-0.813459	1.2004	3.37666	0.983479
-1.55162	-0.874677	-0.8192	-0.486488	-0.62809	0.220786	1.53382	1.19983	3.07733	1.04787
-1.89595	-1.472	-0.890549	0.564314	-0.845778	-1.71955	0.598022	1.36936	2.3055	2.80694
-2.31456	-3.34501	-0.932198	-1.09921	-0.329558	0.303578	2.15665	0.0798794	1.58441	0.0395763
-3.29526	-1.92568	-1.08479	-0.412204	-0.824417	1.4299	1.25474	1.04745	2.5832	1.97095
-2.19956	-2.6546	0.380213	-1.46292	-0.676785	-0.112397	-0.63259	1.0506	2.53549	0.689861
-1.68199	-2.89027	-0.022988	-0.497327	-1.49201	-0.593373	0.342068	1.6689	3.51446	0.55388
-1.88866	-2.01952	-2.47824	-0.714105	-0.612266	-0.782747	-0.932616	3.05765	3.92553	3.351
-2.83999	-4.29821	-0.63858	-0.605318	-0.0584504	-0.697105	0.13371	0.525491	1.51732	2.68771
-0.543473	-1.68336	-0.844946	-2.04179	1.27329	-0.0240383	2.38901	1.35928	0.188361	1.29238
-4.66413	-2.42643	-2.10957	-1.38618	0.76168	-0.645178	0.417441	1.05636	3.45533	0.7597
-1.60621	-2.22814	-0.180671	-1.52395	-1.09833	1.42673	0.0171714	0.993554	2.71434	0.761468
-1.41967	-2.97327	0.842353	-0.83083	-1.18776	0.592335	1.64206	1.87283	0.996324	2.64365
-1.82483	-2.05348	-0.872514	-1.52801	0.997019	-0.400335	1.24169	0.367029	2.18862	2.24952
-2.18306	-2.22103	-1.88204	-0.941066	-2.65073	0.272296	2.90103	1.94021	2.83084	0.948412
-1.80024	-1.06728	-2.5797	-1.32736	0.983054	-1.53946	2.7994	1.31786	2.08241	4.899
-2.53012	-2.40724	-1.20009	-0.53012	0.339868	-0.282755	1.3338	2.63788	1.5015	4.45621
-1.83944	-2.12015	0.476726	-0.659741	-0.105756	0.284225	0.404942	1.73369	2.85668	0.139692
-1.6144	-1.28171	-0.465517	-1.00549	-0.644216	0.143855	2.28586	-0.923649	1.18313	1.24946
-0.708811	-2.11644	-0.470328	-1.55557	-0.962818	0.491078	0.823491	2.00039	1.3837	2.90222
-4.2773	-2.06962	0.101262	-2.35404	-1.77241	-1.09784	0.454653	2.48354	1.22402	0.393719
-1.64613	-2.18696	-0.301914	-4.17346	1.09074	0.645607	2.23381	0.237355	0.435351	2.19923
-2.15324	-4.43251	0.351321	-1.34835	0.536642	0.153198	2.49627	-0.25243	2.65107	1.74191
-1.49202	-2.32403	-1.0622	-0.815091	-2.57827	-0.212971	-0.625512	1.87885	1.14139	2.08544
-3.51108	-2.87142	-1.38595	-2.61873	-0.207995	1.05952	-0.736564	1.3719	2.39352	2.31253
-2.86483	-1.39125	-3.70422	-1.47315	0.907985	-0.490936	0.872896	1.13057	1.17715	1.86097
-1.43836	-0.48525	-2.02274	-0.550249	2.23251	1.35305	0.306294	2.35031	3.42976	1.42192
-1.35208	-3.35165	-1.16745	-1.88529	0.344128	0.0975544	0.816719	2.15185	2.57465	0.27263
-3.40921	-0.869275	-0.925975	0.90756	-0.0647287	-0.451913	-0.444041	2.34082	0.907637	2.67363
-0.433314	-2.23775	7.37877e-05	-1.02824	0.905986	0.220372	1.85891	1.38008	2.3406	2.24619
-1.4412	-3.50489	0.738106	-0.0223682	2.05503	0.851346	1.34161	2.06972	2.30283	0.809742
-3.94392	-3.17402	-0.567436	-0.0750863	-0.755527	-0.381577	0.803399	0.790485	2.38024	3.081
-2.35719	-2.52138	-2.39587	0.568607	2.23087	-1.69078	0.00677576	0.359849	3.49406	1.73398
-2.23011	-2.49101	-1.18888	-0.462269	0.956541	0.329276	0.712099	2.60831	1.79648	2.66817
-1.3207	-0.572453	-1.96937	-2.56522	-1.37782	-0.443075	1.18161	2.65952	2.57579	2.41551
-1.9638	0.0299975	-2.38136	-1.78584	-1.22005	-0.411591	0.817193	2.17855	0.697173	5.01103
-2.6344	-2.5251	-1.13803	-0.480332	0.906207	0.847231	0.430769	2.84198	2.50793	1.46979
-1.61227	-2.3548	-0.0703274	-1.41846	0.507372	1.61592	0.798942	0.921617	1.35256	2.29421
-0.822948	-2.64111	-0.824407	-0.0742383	-0.90737	1.45916	0.596732	1.34606	2.44552	1.75787
-0.677306	-1.80582	-0.451855	-1.43209	-0.337043	-0.084198	1.66384	0.020857	1.4343	2.21808
0.565453	-2.46411	-2.01336	-1.27335	0.0591157	0.614891	-1.24133	0.0153478	1.51283	1.33182
-2.20269	-1.85435	-2.38436	-1.55088	0.0487853	-0.165057	-0.270321	1.65014	0.488736	2.30051
-4.18103	-1.39773	-0.896339	-1.44736	-0.758813	-0.812459	0.128528	0.475417	2.82503	3.54777
-1.51915	-1.89068	-1.85578	-1.11941	1.10152	-0.731706	0.608726	1.92473	0.574504	1.67628
-3.5444	-3.54656	1.0373	-3.00803	0.634992	-0.50186	1.16591	-0.42481	1.65519	3.77111
-1.41338	-0.824821	-1.45605	-2.83577	1.33413	-0.82991	3.3341	-0.0386743	0.367764	2.13682
-0.405535	-2.89544	-0.137479	-1.6055	1.44099	0.390149	1.81366	0.238262	2.72361	1.03549
-3.0308	-2.27194	-1.78597	0.543549	-0.0519412	0.408156	-0.256515	2.02251	1.25518	1.79991
-3.97573	-2.58893	-0.36684	-1.03706	-0.136221	-1.40935	0.372252	1.41127	-0.584596	3.69743
-1.14821	-0.365397	-0.464526	0.545825	1.04291	-0.105198	1.34649	1.11796	1.00508	1.73202
-1.72084	-0.359446	-1.20046	-1.68908	-1.16748	-0.70737	-1.4542	1.27673	1.24075	2.4372
-1.58913	-1.80864	0.23842	-0.172467	-0.0663283	-1.1375	1.19036	0.634941	1.58996	2.08902
-2.17144	-1.81306	-0.0727665	2.10675	-1.8772	0.380162	1.42083	1.08688	1.09793	2.28836
-2.25485	-2.14091	-0.452241	-0.7464	0.0559674	-0.75243	1.83063	1.534	3.10148	1.84647
-2.66189	-1.74097	-0.405096	-0.17848	-0.389149	-1.57247	2.79516	1.98358	1.59533	1.59365
-1.98555	-3.47958	-0.636669	-0.80554	-0.265439	-0.577683	2.19442	0.421665	2.88397	2.16036
-2.2407	-2.85567	-1.91545	-2.05211	-0.230338	0.246457	1.30943	0.17897	2.88946	2.73995
-4.0482	-1.51612	1.3166	-0.332332	0.331274	-0.742671	0.517735	1.65434	0.733526	1.76095
-0.441312	0.36973	-1.66217	-0.348464	1.95276	1.1049	2.14236	1.21774	1.87989	1.69001
-0.43758	-2.8708	0.131638	-1.56819	-1.20709	-0.620293	1.70041	2.29951	3.40608	0.495906
-0.824755	-0.880101	-3.23895	0.130665	-0.88062	-0.190516	0.332743	1.30152	1.45419	2.72989
-3.98783	-1.13871	-0.933312	-0.489765	-0.486566	0.133415	2.20146	1.52738	2.52029	2.59209
-1.37282	-1.83719	-1.03243	-0.889521	-2.47374	-1.8859	1.04613	0.237389	2.75259	1.30872
-1.71138	-1.94169	0.368478	-0.198595	-0.885496	-0.53941	2.25304	2.67831	2.53256	1.63357
-0.368064	-2.40179	0.737327	-1.2559	-0.410118	-1.64799	0.976842	0.304395	2.45409	2.01156
-2.19994	-1.99261	0.521765	-0.561905	-0.0959462	0.0507166	1.5609	-0.390165	1.72605	1.13016
-1.72434	-3.76325	-2.01262	-0.250412	-1.50022	0.438959	0.502249	0.465313	1.55209	2.47877
-0.612026	-1.7738	-0.29239	-0.118536	-0.408876	-0.379745	0.369844	1.17689	1.58461	1.82422
-1.43088	-1.80268	-2.18138	-3.2547	-0.440859	-0.200239	1.74521	0.729844	3.16456	1.94669
-2.18644	-2.35524	-0.950753	-2.04034	-0.128614	0.620593	1.62152	2.16478	2.86173	1.59268
-1.90389	-1.84795	0.390904	-1.49498	-0.206896	-1.0222	0.129765	0.3482	0.0535255	3.29167
-0.844738	-1.65394	-1.37291	-1.14167	-0.409393	-0.160263	1.84142	1.77902	0.789189	2.03774
-2.13349	-0.0134349	-2.39765	0.863317	-0.940132	0.333784	1.95403	0.936349	2.15194	1.75214
-3.27943	-3.34021	-1.81327	-0.509212	-0.243916	-0.695242	2.83053	0.540932	2.25164	-2.08849
-1.6454	-2.21237	-0.459164	-1.93116	-0.650293	-0.0281103	0.284854	1.60404	1.00316	2.59114
-3.7746	-2.31223	0.397717	-1.97635	2.07785	0.86951	0.949419	-0.00813668	3.48435	3.58826
-2.71066	-0.868871	-0.703208	1.64235	-1.42049	0.632496	0.701359	1.38695	2.52503	1.19896
-2.62125	-0.949385	-1.41184	-0.18598	-0.239399	1.24631	0.00176541	0.627794	2.60361	0.0984558
-1.54022	-2.20633	-0.428518	-1.85342	-0.0663351	0.337217	0.7218	1.15146	3.22142	3.07958
-1.97883	-1.57134	0.959438	-0.783756	-0.655569	1.26158	0.779832	2.27357	0.408087	3.05169
-4.30804	-1.67293	0.663536	-2.02992	-0.105173	-0.304952	1.24336	0.93366	3.45736	1.82282
-2.37912	-0.202081	-0.236957	0.0810365	-3.0905	0.784034	-0.780525	0.324376	0.673746	1.4466
-2.69127	-0.857436	0.352575	-2.81089	-1.90368	0.747613	3.16711	0.762438	2.60266	1.31089
-4.51492	-1.18537	-1.82888	0.182747	-0.275202	1.57087	-1.21386	1.32075	0.214519	3.17848
-1.7239	-2.24702	0.428689	-0.873534	1.6322	0.875992	-0.686039	1.71852	4.05133	2.18174
-2.12089	-2.26056	-0.891908	-0.101052	1.6217	-0.492037	-0.743125	1.86177	1.62577	1.29728
-1.577	-2.13425	-1.87191	1.60062	-0.287931	-0.816456	-0.120071	0.0343047	3.18748	0.797775
-3.78774	-2.18581	-1.96195	-0.37733	-0.296633	1.28413	1.35751	1.11309	3.17936	3.28918
0.234722	-1.95315	-0.489086	-2.09083	1.18088	-1.31018	-0.853018	1.16893	1.42321	3.59625
-1.70921	-2.43805	0.640284	-0.625199	-0.483005	0.830996	-0.0483523	-0.639842	2.57585	2.99014
-1.82595	-1.82205	-1.13828	0.0978183	0.356873	2.01307	1.03793	1.25225	1.24389	1.62803
-2.2612	-1.13674	-0.984026	-0.410442	-0.997264	-2.48497	1.56194	0.777019	0.959846	-0.799737
-2.92308	-2.1302	-1.07761	-0.478462	1.04652	-0.578507	1.30218	2.04465	3.3446	1.90983
-1.49495	-2.267	-2.10492	0.515926	1.48778	-1.58869	0.700036	1.24841	3.48255	2.37471
-3.22388	-1.44174	-1.04701	-0.351219	1.60638	0.328349	0.719416	1.45377	1.26966	3.55137
-2.98216	-2.44731	-3.00149	-2.55171	0.289818	0.852131	2.06342	2.04346	3.60587	2.60537
-2.82815	-2.11073	-0.810893	-0.334949	-0.709892	-0.282552	0.725059	1.5213	1.47553	1.49387
-2.42939	-2.47459	-0.472171	-0.696216	-0.122079	2.03646	1.21205	1.90589	1.45847	1.99315
-1.31902	-0.237391	0.494576	-0.792393	0.0739076	-0.737482	1.34208	1.68961	2.7773	1.40225
-2.35751	-1.47734	-1.59209	-1.39687	-1.19837	1.96381	2.02239	1.10348	0.852532	1.35148
-2.35541	-1.90106	-3.404	-1.54557	-0.528074	-0.558624	-0.343131	-1.60467	1.14125	2.87791
-0.872249	-1.94971	-2.54083	-0.520978	-0.106958	-0.674627	2.54639	2.24865	2.7743	0.773614
-2.81555	-2.72993	-0.0045957	-2.00706	2.4507	-0.174872	-0.587834	-0.965436	0.644445	1.62519
-2.61675	-2.0133	-0.947811	-0.928626	0.516327	-1.39356	1.45318	0.0720107	1.85981	1.46457
-1.14199	-3.3588	-0.364252	-1.58323	0.428514	-0.89951	-0.556615	-0.353952	1.35756	2.09746
-3.03729	-2.92454	-1.2694	-0.612967	0.0221818	0.0684965	1.36065	-0.298699	2.57382	3.61975
-3.74941	-0.674077	0.320886	-2.04894	0.125542	1.24399	2.33443	1.57	1.58539	1.54228
-2.03638	-0.0992207	-2.85	-1.15234	-2.09205	0.635517	2.0263	1.36682	2.12986	2.51838
-3.42433	-0.705818	-0.00602452	-0.438678	0.939392	0.17994	-0.0883478	-0.0120902	3.56804	2.77119
-2.70165	-2.40737	-2.05728	-0.261927	-1.16104	-0.600869	1.62466	2.55017	0.979742	1.88092
-2.98896	-2.94986	-0.502247	-0.477598	0.611364	-0.628488	0.329823	0.0848602	1.57619	2.96749
-3.32375	-1.78367	-1.44706	0.203627	-1.28168	0.636667	1.99203	0.109571	1.22737	-0.221741
-3.3142	-2.2418	0.402901	-2.71752	-0.364596	-0.143231	2.20875	0.706509	3.84743	1.05569
-2.0092	-1.33339	-1.04446	-1.7974	0.734192	-0.0320869	0.832787	0.662133	1.10303	1.37916
-1.89961	-1.67867	-2.21847	-2.5828	0.337282	-0.999825	2.03638	0.564566	2.96596	0.527218
-1.48559	-2.01725	-0.217381	-1.57538	0.387593	0.458583	1.0427	0.365659	0.273253	2.76789
-1.63665	-2.97972	-1.10376	0.0156377	-0.180551	1.63746	1.95471	2.01483	0.698591	3.55033
-2.77547	-0.102489	-2.40456	-1.98161	-2.96747	-0.748369	2.62945	2.84531	3.17944	1.59133
-2.01173	-2.7105	1.24319	-1.96508	-0.684695	-0.738498	-0.288801	1.11284	2.80069	2.99889
-0.62012	-2.15684	-1.29131	-2.01305	0.25788	-0.524318	2.00322	0.691977	0.843279	2.74981
-2.64649	-3.44899	-0.158957	-1.12715	-0.0541709	-0.0183916	1.79249	-0.269375	2.32797	1.31824
-1.22051	-3.0863	1.3289	-1.10238	1.17572	-0.475946	0.904684	-0.448846	2.35123	2.41988
-2.53903	-1.3559	0.495433	-1.10686	0.785057	0.647858	1.01732	0.805678	3.47573	2.1594
-1.81637	-2.08643	-2.23021	-1.38173	-0.855351	-1.0309	1.67251	2.04124	1.18906	1.82559
-2.21399	-0.854073	0.480669	-0.466772	-0.0622139	-0.586426	0.488562	0.480245	1.07067	2.70355
0.230274	-2.54876	-1.22979	-2.06823	-0.151027	0.314674	1.0094	1.33216	1.36753	1.19172
-1.4311	-0.0711997	0.39852	-1.51997	-0.079925	0.0647005	0.1772	1.68189	2.3479	1.61713
-0.920943	-2.68683	-0.612447	-2.82389	-0.207287	0.796591	1.94669	1.19663	0.43608	1.12204
-2.43068	-2.59797	-1.25249	-1.75389	-2.36239	0.471923	2.40367	2.44153	2.76342	1.742
-2.91344	-2.62391	0.618547	-1.27652	-1.70498	1.16851	1.28162	0.838348	0.587492	1.2696
-1.73812	-2.58703	-1.51629	-0.623103	1.38589	-0.439695	1.42167	0.763834	2.17521	1.24544
-1.1238	-1.87674	-1.19218	-1.51126	0.593606	0.573174	1.09042	0.698399	2.79821	2.31839
-2.39713	-1.11391	-0.512712	-2.0447	-0.406236	1.25256	0.111984	0.873523	1.27316	1.71313
-1.68103	-1.73513	-2.74195	0.387728	-0.976658	-0.916265	2.11167	-0.256069	3.66537	0.986882
-0.959962	-1.42673	-1.96482	-1.58998	-0.764546	-0.44445	0.569606	1.50243	2.24803	1.27178
-2.1089	-1.06245	-1.2914	-2.19905	0.293462	-0.262055	1.28046	-0.0644599	1.37334	-0.284063
-1.69068	0.917309	-1.54982	-0.371408	-0.272929	-1.00534	0.0813148	1.39393	2.741	3.69334
-0.901311	-0.846787	-0.145964	-1.42243	-0.373702	-0.00477836	2.15944	0.0303594	3.45264	1.05442
-0.709007	-1.92016	-1.94781	-1.84526	-0.0921767	-1.43722	1.59964	0.318793	1.89671	0.899218
-0.687105	-1.97664	0.617879	-2.67032	-0.211901	0.705865	1.15665	2.43733	2.44467	2.30122
-2.83117	-2.56399	-0.44844	-0.999365	1.81462	0.0747152	-0.0702762	0.937267	1.01989	1.90929
-1.47205	-3.56112	-1.24162	-1.61402	1.56952	1.54114	-0.761813	0.326682	3.08981	1.66168
-1.79165	-2.72835	-0.719984	-1.33306	-0.469064	-0.820421	2.24884	1.34188	3.59595	4.06455
-1.28178	-2.74617	-1.75535	-2.0739	-1.70158	-0.138598	0.614204	2.043	1.7398	2.68595
-0.127697	-1.23218	-0.816608	-2.07481	-0.956698	1.42792	1.85962	0.404553	0.281343	1.62044
-3.26886	-0.241241	-1.13575	-2.25431	-1.01449	0.226473	1.99047	1.76754	0.877466	1.13415
-2.22725	-2.72748	0.682626	-2.39667	-0.435711	-1.36282	1.14014	-0.491742	1.64225	1.17817
-3.0238	-1.43224	-0.656585	-1.22271	2.02153	-0.683048	0.863488	0.360951	1.94264	2.93411
-0.495478	-2.57843	-2.0489	0.412958	1.41211	-1.08679	0.18534	1.54831	1.57232	1.26109
-2.99762	-3.1397	-2.40227	-1.14878	0.579977	1.1179	1.11638	0.938342	2.50201	0.945614
-0.503595	-0.329271	-0.609184	-0.481787	-0.149758	2.52646	2.35276	0.0924864	1.55318	3.93174
-2.34847	-1.46229	-1.85245	-1.62713	2.1743	-2.13742	1.56248	1.20323	1.81093	2.05865
-2.00291	-2.06063	0.109401	-1.09447	-1.32351	1.22381	2.0013	0.498723	1.99007	2.34684
-1.03598	-1.55904	-1.59869	-1.06012	-1.15604	0.111881	-1.7332	1.87737	2.58209	1.39121
-1.67051	-2.29258	-1.36161	-1.72804	-1.52061	0.170504	0.153638	-0.658062	2.11393	2.88519
-1.1844	-2.28201	-2.64816	-0.602216	0.421355	-1.69202	3.21541	0.564878	1.56016	1.31925
-1.95008	-1.78052	-2.13517	-1.11703	1.15403	2.26283	1.908	1.82419	1.58994	1.43795
-3.20116	-2.29909	-0.976456	-2.48476	-1.43485	-1.11351	0.0622397	0.341874	2.86664	3.88764
-2.3126	-1.8988	-2.58978	0.198556	-1.48279	-1.12899	3.1772	1.95227	2.95038	1.92774
-3.11182	-3.18655	-1.09062	-1.66801	-1.67547	-0.0110556	1.22816	1.19168	1.29021	0.894
-0.376538	-0.843556	-1.71522	-0.731328	-0.416848	0.263271	1.71841	2.00979	2.0725	2.37267
-1.11096	-0.175181	-2.42844	-0.496606	-0.084816	2.49499	0.656479	1.61438	-0.240286	1.89196
-1.5804	-2.09108	-0.887722	-1.7248	0.144913	-0.781887	-0.189075	-1.04884	0.674045	2.49084
-1.51782	-3.87929	-0.0578115	-0.926382	0.62864	0.179667	1.19585	-0.616432	2.03695	0.07949
-3.09808	-1.24136	0.0564845	-1.61451	1.74371	0.636486	-0.00603597	2.49154	1.03277	1.38198
-1.96738	-3.27764	0.348087	-1.7276	-0.342428	-1.4917	-0.0846367	0.241321	2.97305	0.604431
-1.34146	-1.0011	-0.116017	0.0884281	1.80574	1.06007	0.41987	-0.249555	3.94454	2.40805
-1.33212	-2.0303	0.69169	-1.69387	-2.38808	-0.861041	2.02008	0.754432	1.69157	2.74751
-2.83605	-1.89241	-1.57054	1.02843	0.79254	0.379086	0.403568	0.9809	3.78821	3.56456
-1.57308	-2.35859	-1.56638	-0.406678	-1.62338	1.74129	1.40585	1.76035	0.233425	0.660515
-1.39696	-1.68557	0.0190273	-0.0854186	-0.564001	0.784304	0.935229	0.031708	2.83248	1.10952
-1.66689	-4.03254	-0.732582	-0.222551	0.247027	1.5093	-0.470612	2.99332	1.7351	2.25337
-0.918907	-0.275608	-0.945262	1.09136	1.45246	2.27846	-0.761039	1.88463	2.6084	1.00277
-2.40247	-3.4769	-1.31871	-0.713188	1.37888	-0.0622098	1.38392	-0.352807	2.67027	3.53846
-1.36107	-2.46566	-1.47559	-2.91667	0.47429	0.690159	1.68826	0.795515	2.66569	1.86405
-2.96701	-0.782284	-2.60663	-1.87414	-0.856228	0.880768	1.54386	0.43347	2.48331	2.86483
-3.38338	-1.28257	-0.806142	-1.52175	0.0233875	-2.23618	0.646714	1.16264	1.66035	0.585907
-3.24773	-0.537732	-1.56593	-1.4299	-1.28933	-0.737116	-0.00656679	-0.0052738	1.09361	1.98096
-1.48345	-2.25739	-1.83594	-2.25774	1.53483	0.125909	2.59405	1.87056	1.48945	1.00217
-1.85063	-1.41791	-1.12022	-2.0674	1.03974	-0.14526	1.20828	-0.232982	0.925413	2.57815
-1.17011	-1.17221	-1.93501	-1.93677	0.902395	1.75943	1.14207	-0.00806365	1.99542	0.967597
-1.45327	-2.47738	-1.99016	-1.58709	-1.11275	-0.294564	-0.697742	-1.59101	1.96836	2.87198
-1.33592	-3.31132	-0.507695	-0.269683	-0.622499	-0.872288	1.99148	1.20712	3.48659	0.222361
-0.995907	-1.12699	-0.536216	-1.17414	0.484212	-0.360946	1.58438	0.38729	2.52714	1.48032
-0.605919	-2.58878	0.378505	-1.7462	1.02859	0.287433	1.07335	-0.939418	2.02267	0.499992
-1.81379	-1.14171	-1.07942	-2.14061	0.730418	0.213265	-0.0287662	-0.577722	1.55009	3.71534
-1.68214	-2.42667	-0.921879	0.849376	0.786657	-2.14005	0.792891	1.46776	2.28018	1.32599
-1.69267	-1.93197	1.15551	0.35761	-0.613487	1.12343	1.15719	2.17826	1.59161	0.218129
-1.0043	-2.62846	-0.0184791	0.354522	-0.0360302	-1.07271	0.910512	0.0273299	1.66209	0.525169
-1.66051	-1.70707	-1.96199	-1.30354	-0.616764	1.26469	1.03886	0.282401	1.77497	1.61972
-1.24267	-2.07289	-0.602175	-1.98891	-1.74845	-0.555007	2.23885	1.11307	0.814495	1.45699
-1.87269	-2.07095	-1.26621	-0.380878	0.0413185	1.19755	2.50332	-0.402704	2.46078	1.91455
-1.96593	-1.99164	-0.783323	-0.924919	-1.28017	0.157149	1.39212	-0.107128	4.35242	0.639429
-2.32674	0.8273	0.18432	-0.353202	1.44145	-0.635995	1.19821	0.461802	3.05813	2.13063
-2.84391	-3.17341	-0.36578	-1.1615	0.282897	-0.106373	-0.427889	1.51559	1.34039	2.52127
-2.79563	-2.71005	-2.66444	-2.3037	0.0378986	1.70731	1.02287	3.01106	2.48507	1.51881
-1.98856	-0.569067	-1.17254	-0.705919	-0.684379	0.4789	0.767418	2.21506	2.62546	3.8205
-0.311616	-1.76268	-0.883214	-1.98837	1.76325	1.50865	1.48861	3.67095	3.33904	3.54974
-4.49821	-1.61564	0.950191	-2.05069	-0.49651	0.283455	0.622038	2.58052	1.76218	3.1116
-3.31065	-2.5007	0.12066	-1.99517	-1.17393	0.408769	1.66764	0.938019	1.83278	3.59689
-3.14972	-1.57438	0.420237	-3.26879	1.0569	0.097213	2.25636	0.787903	0.656718	1.93222
-2.62661	-1.22788	-1.62911	-0.99735	0.031102	0.438391	0.319572	0.0782213	0.972444	1.86154
-1.5227	-2.24007	0.370556	-0.137316	-0.822782	-0.166286	-0.682755	0.138613	-0.020287	1.98792
-1.91944	-1.08258	-1.58625	0.698445	1.60036	0.491763	2.92293	2.1206	0.406787	2.72358
-2.37213	-1.08438	-1.09099	-0.145136	0.607034	0.532697	0.66772	2.46526	1.27637	2.44046
-2.01932	-1.7306	-1.40125	-0.857671	-0.3841	1.76108	1.09638	1.15648	1.47679	1.98744
-1.20076	-0.668467	-1.84995	-0.985696	-0.378931	1.81456	0.87868	0.638317	1.83434	1.2157
-1.47919	-1.94163	-2.04778	0.256939	0.0124409	1.44204	3.73376	0.211188	3.98743	2.51489
-1.27931	-3.54545	-1.57136	0.393079	-2.17223	-1.00961	1.18448	2.0591	2.15293	2.45131
-0.361038	-3.32549	-1.93789	0.116657	0.299719	-0.0670666	1.50371	0.186483	1.62118	0.970448
-1.09629	-2.56416	-1.7147	-0.309656	-0.294103	0.0440418	0.428878	1.4302	1.73084	3.61209
-1.49275	-2.11657	-1.19703	-0.830235	0.296779	0.757891	0.728118	1.42481	0.47788	2.43682
-1.69641	-2.80079	-0.326473	-1.72667	0.702718	0.177391	1.48598	2.00147	1.00159	1.95121
-4.16063	-1.59334	-3.10543	0.164479	-0.037606	-0.0817108	0.959781	0.47926	1.38195	2.33943
-2.6005	-2.64864	-2.54539	-0.583073	-0.442579	-0.501613	-0.123562	3.32473	1.66844	2.45996
-2.72532	-0.0155888	-1.4179	-1.0624	1.24441	0.435906	1.07407	0.699588	2.28109	0.770478
-2.58219	-1.67319	-0.968885	1.46242	2.4574	1.16675	2.4587	0.000279507	2.29378	2.0186
-3.16044	-0.476903	-2.06011	-0.662263	-1.28406	-0.72776	2.31422	1.76424	2.57488	2.20916
-2.55627	-4.60064	-1.33869	-0.379114	-1.32062	-0.258874	0.5121	2.02292	2.37596	3.35863
0.71195	-3.09815	-1.31818	-0.251045	-1.06745	0.806094	0.82925	0.302552	1.00408	1.86733
-0.691068	-1.26693	-1.96742	-0.473683	-1.35568	-1.34386	1.54	1.61063	2.81896	1.21301
-1.34782	-2.23148	-0.530977	-1.93689	-2.04696	-0.767587	1.61563	0.21293	2.51922	2.04128
-1.8108	-0.776064	-0.297846	-1.69081	-0.983111	1.71739	0.655354	0.648751	1.21545	1.70425
-2.30093	-1.74869	-1.53013	-1.32965	1.02482	-0.19534	0.803913	0.792396	0.227256	3.10728
-1.07171	-1.91661	-0.816025	-1.30579	1.10553	0.206072	-1.13777	-0.146386	3.73253	3.21098
-2.42498	-0.548321	-1.71235	-0.913784	2.45658	0.232847	1.46026	0.16468	3.19923	-0.079347
-1.65831	-2.12517	-0.645643	-0.773122	1.51413	-0.166026	2.51131	-0.2602	-0.612091	1.2148
-2.77589	-3.0056	-0.242824	-1.08161	-0.71107	-0.866716	0.575813	0.609371	2.54929	1.82822
-1.10622	-1.05073	-0.252717	-1.03125	-0.85235	0.599167	0.881221	1.82521	0.54163	2.47337
-4.17071	-2.61549	0.670759	-0.86559	0.371234	0.277191	0.307905	0.564059	2.228	2.57664
-1.03511	0.424307	-1.42345	-1.14599	0.707105	-1.59375	0.891111	-0.395079	3.76449	3.5515
0.150354	-1.05813	-0.223465	-0.996846	-0.952694	1.21103	0.91722	1.60581	0.543882	1.87532
-0.626668	-2.52742	-0.92435	0.743978	-0.453227	0.604083	1.83513	-0.804317	1.87512	1.71807
-1.22547	-3.23716	-1.04617	-1.74431	-1.03109	0.808277	-1.39397	0.716218	1.26898	1.48771
-2.56188	-1.67903	0.0334747	-0.78887	-0.341977	0.446974	0.920803	0.451615	3.33637	2.52791
0.167937	-1.25204	-2.65024	-2.12831	-1.31638	-0.517821	2.12625	1.11021	2.92284	1.19783
-1.72617	-2.17008	-1.94644	0.567119	1.07946	-0.00569426	0.828245	0.466571	2.64975	1.15547
-3.32244	-1.39714	-1.01973	-0.561107	-0.603308	1.18454	2.8848	1.95075	4.4677	2.36272
-2.34909	-1.76096	-0.250797	-0.848974	0.3909	0.943268	-0.882994	1.04103	4.28286	2.13722
-2.88933	-1.87875	-0.740334	-1.12945	0.00580123	1.08993	0.393727	1.67802	2.02623	1.07394
-3.53703	-1.49609	-1.16393	-0.646542	-1.2497	-1.39827	0.766758	0.259907	2.36122	2.58414
-0.680274	-1.08605	-0.890954	-0.128145	0.750937	0.888779	1.99069	1.36443	2.71435	0.853116
0.113824	-1.67545	1.57764	-0.877524	-1.04096	0.27671	1.01298	1.19131	1.23866	1.8994
-1.49464	-1.48514	-0.561027	0.425517	1.46349	-0.187373	0.969269	0.786714	1.83911	1.00366
-2.87973	0.153233	-2.7212	-2.15094	-0.929532	0.332847	1.17948	0.499544	2.27697	3.29304
-1.01142	-2.24283	-0.973319	0.0479626	-0.107397	-1.15737	0.873214	0.975094	3.80883	0.378487
-2.90283	-1.41849	-0.600208	0.130255	-0.506489	-0.822601	0.176064	0.406279	1.70669	1.36894
-1.14245	-1.86212	-0.695166	-0.339173	-0.67177	-0.295611	1.05188	-0.464181	3.74755	2.24931
-1.81393	-2.18812	-0.959768	-2.10644	-0.500111	-0.38581	0.371905	2.03184	-1.07873	1.49959
-2.00275	-0.664859	-0.42953	-2.28929	0.328204	0.318007	2.6838	0.785172	1.13111	2.81091
-0.599382	-3.50018	2.14537	-1.49024	-0.85758	0.532193	0.632417	1.43287	2.43614	1.99053
-1.86112	-3.2041	0.5237	-2.53546	0.662727	-0.540457	0.808691	0.646013	1.36113	1.76213
-3.3357	-1.41405	-0.92384	-0.285239	-0.0897371	-1.5577	0.15722	0.982285	3.01842	3.38559
-2.84157	-5.15336	-1.72313	-1.20682	-0.3331	0.279745	2.07603	1.85756	3.31223	1.26587
-1.35485	-0.717858	-0.948656	-1.47813	0.19349	-1.28154	0.776869	-0.29559	1.9154	2.23202
0.0387771	-2.39629	0.88345	0.226157	-0.293625	1.43469	1.17461	0.864771	0.967259	1.32079
-0.554555	-4.62101	0.542661	-1.54113	1.8769	2.03758	2.72403	-0.162218	2.19476	2.73711
-3.0434	-1.48103	-1.05208	-0.363982	-0.38597	1.04933	1.27804	1.35887	1.48819	-0.0473513
-1.52847	-0.679582	-0.538993	-1.08916	0.359491	-1.96237	0.508477	0.306322	1.31091	0.825419
-1.04331	-2.08157	-2.06999	-0.663374	1.58486	-0.276292	1.06978	2.1733	0.270764	2.99871
-0.470752	-1.31352	-0.533801	-1.98442	-0.0463836	-1.42922	0.742431	0.195224	2.45072	3.12483
-0.282911	-2.80428	0.300729	-0.695417	0.905772	-0.879171	1.91077	2.07924	0.315092	1.59405
-1.69975	-2.4296	-1.21306	-1.77867	-0.260833	-2.49395	1.13578	2.57959	1.18931	-0.487443
-1.19409	-2.21955	-0.660792	-0.0456131	-0.0258725	1.13219	0.15494	1.91667	3.11447	1.33576
-2.25185	-3.32649	-2.4526	-0.967538	1.66612	0.870365	2.91338	1.60709	1.91812	1.59158
-1.6918	-0.884511	-0.119885	0.459382	-1.52148	-0.349134	1.9172	0.198187	1.84047	0.929998
-0.991804	-5.01603	-1.80841	0.0347545	-0.246639	1.64933	1.21641	1.24009	4.26539	3.9966
-3.61965	0.00514053	-0.0436551	0.23609	-0.955905	-0.265301	1.44647	1.65369	0.226478	3.38962
-2.18763	-2.14894	-1.13318	-0.862316	-2.44971	0.882229	-0.188296	1.05178	3.80277	2.22154
-0.834665	-1.80335	-1.57097	-1.78032	1.42107	-0.403966	0.667409	-1.04888	2.28191	3.27487
-2.63259	-2.20985	-1.57594	-0.88421	-0.0978466	1.15898	-0.703614	2.14644	1.54376	0.600641
-0.102839	-3.38139	-1.90843	0.348296	0.710661	-0.551553	2.14444	0.388065	0.593223	1.78381
-0.698775	-2.31239	-0.245761	0.232393	1.09395	0.961913	1.06039	1.24114	3.87905	1.7937
-2.27123	-0.137087	-1.78938	-0.999117	0.877438	1.49361	-0.128551	1.86097	2.59683	2.11887
-2.64287	-1.16494	-1.1009	-0.704256	-0.3477	-0.514324	0.911589	0.493751	0.202294	1.09271
-2.36305	-3.43207	-0.633954	-1.44696	-0.0859244	-1.14153	-0.666259	-1.62039	3.32933	2.53395
-2.16602	-0.831074	-1.24509	-2.43172	0.0565095	0.261963	1.43459	1.11032	2.5489	1.80169
-2.18589	-1.45058	-2.93853	-0.527816	0.617491	0.447973	1.06179	1.87958	2.53792	3.53443
-1.81145	-1.95317	0.402297	-1.40578	0.0795067	-0.426368	-0.536962	0.976203	1.78842	1.32887
-2.4175	-1.86822	-3.18733	-2.07351	-0.189949	0.156007	0.671726	2.65888	2.16562	1.99331
-4.03289	-2.44832	-2.4057	-0.730954	-0.818588	0.121306	1.20649	0.45629	1.70625	0.666846
-3.80394	-1.7303	-0.273738	-2.0524	0.134671	-0.779877	1.25304	2.15137	1.64444	0.289189
-1.64534	-2.79607	0.211411	-1.37594	-0.0761322	-0.758942	1.45114	3.07684	2.96454	0.226871
-1.19869	-1.60417	-1.2587	-0.168521	-1.21231	-0.560297	1.73805	-0.471571	2.12543	3.78509
-1.70643	-2.3614	-0.896567	-1.04753	-0.883248	0.663331	0.229709	2.45932	1.79328	1.02787
-1.52721	-0.945793	-1.45516	-0.599552	0.849132	0.501328	0.68142	-0.105534	2.71563	1.59641
-2.66044	-2.81684	-0.450809	-1.55163	-0.81722	-0.47504	0.927806	1.66658	3.20125	1.61408
-0.810989	-4.31843	-0.667671	0.468244	0.370802	-0.417485	1.2292	-0.264199	1.37742	1.87495
-4.61729	-3.81473	-3.22876	-0.315544	-0.432984	-1.21101	0.873373	-0.0506063	2.52092	2.59873
-1.81826	-1.84763	-1.81279	-1.7336	1.01343	0.395313	1.64795	1.77466	3.59991	1.85757
-1.50349	-1.92402	-1.4402	-0.133829	2.01025	-0.0279927	0.280379	2.11154	2.58727	2.23127
-0.46262	-0.424217	-1.91701	-0.108311	0.137954	0.0498123	1.08185	1.82815	2.11773	0.86505
-0.840989	-3.1558	0.206763	-0.548354	-0.660898	-0.226895	0.395207	0.524693	3.13729	1.97621
-1.63642	-2.8662	-0.890906	-2.03097	0.721552	-0.57973	0.54617	1.26804	2.37923	1.30631
-2.50071	-3.02336	-1.48382	-1.09423	-2.27732	1.32536	-0.0719069	1.92801	1.03369	3.54382
-1.98929	-1.45588	-0.751377	-0.25509	0.79285	-0.0560757	0.372361	-0.554922	1.74097	1.49006
-1.92131	-3.19337	-2.23357	-0.423285	0.913903	-0.577563	2.03969	0.997708	3.23908	1.48679
-3.52604	-2.76208	-1.16378	-0.3071	-0.11446	-1.04415	1.52123	0.214602	1.5637	2.44612
-2.77764	-1.21573	-0.779902	-2.69051	-1.37754	-0.427796	1.51532	-0.31536	1.37687	2.62856
-2.31928	-2.18867	-0.752457	-0.630591	0.607075	-0.458673	2.54495	0.692359	1.32368	2.07088
-2.15694	-0.903152	-0.0547276	-0.241184	-0.221278	2.53407	0.532847	2.59038	1.83349	3.04531
-0.363885	-1.57294	-0.669231	-1.97735	0.252218	1.17567	1.90914	2.88244	1.23585	2.67451
-2.24831	-0.597498	-0.42032	-0.421931	-0.754524	1.06501	1.28107	2.01869	0.351114	2.39471
-1.56176	-2.4211	-1.24974	-0.104139	-0.691792	-0.150858	0.297668	0.0973359	1.96314	0.999463
-0.989426	-1.79277	-0.186285	-0.143411	0.896743	0.0670377	0.249509	1.59341	1.32774	1.90983
-3.43403	-1.37309	-0.474296	-1.12593	2.50316	-1.97309	1.89026	0.434662	0.430741	2.64192
-1.70017	-3.85664	0.199216	-1.5465	-0.445035	-0.419118	1.65318	-0.264238	0.225106	1.44469
-4.15104	-1.8637	-0.887266	1.22098	-0.991081	0.0699165	2.30766	0.507195	0.719095	3.37149
-1.31664	-1.39142	0.734281	-1.82554	-0.409328	-0.676762	-0.145418	0.567313	2.44851	2.49841
-3.36098	-2.34701	-2.2483	-1.51432	0.306571	-1.35946	-0.64069	1.0439	2.05791	2.78332
-1.33341	-3.53575	0.431272	-1.30677	-1.64979	0.204154	2.06261	0.122297	1.77713	2.6193
-1.91472	-1.78667	-1.4063	-2.87317	-0.162747	-1.85927	1.4661	1.11356	0.120759	1.77527
-1.07624	-4.45389	-2.38873	-1.39878	0.275845	0.613704	1.26185	1.18821	2.82797	1.69048
-1.85501	0.0181219	-1.58884	0.881606	0.325977	-2.16786	0.566151	1.58284	2.30923	0.709945
-2.62121	-2.31624	-1.93435	-0.796606	0.00545181	0.275793	1.69251	1.021	2.57347	1.01133
-1.04601	-2.76314	-2.17344	-2.0255	-1.75885	2.09971	1.31288	1.45744	0.54701	2.11229
-0.843045	-1.45947	-0.548237	-1.59215	0.843106	0.207212	1.05596	1.32916	3.07708	1.99489
-3.57407	-1.89941	-1.54043	0.304515	0.819924	-0.966169	1.92634	1.2343	0.995185	2.02358
-3.45898	-1.04745	-0.893976	0.450516	0.517978	1.23564	2.27153	2.03839	2.28556	1.57218
-3.68067	-3.81175	-0.836343	-0.401501	-2.01326	-0.317911	2.08173	0.189348	2.60095	1.71713
-3.1373	-2.80307	0.160775	-1.44355	0.466621	0.921443	0.603792	-0.185333	2.14275	1.9667
-0.685059	-2.01826	-1.75106	-1.5139	0.733583	-0.0777344	3.52663	0.0686129	1.64719	0.868928
-1.709	-0.9251	-2.23264	-0.30986	-1.10718	0.39417	1.27065	-0.606171	0.585918	1.44906
-2.69781	-2.57833	-1.80179	0.321575	-2.52864	-0.578775	0.459795	1.78578	3.88046	3.47448
-2.84745	-1.2151	0.293095	-0.62913	-0.269931	-0.574947	0.429392	0.596484	1.66135	2.54745
-0.366724	-1.74126	-0.0607051	-1.58213	-0.328065	0.468255	1.15465	1.73579	1.25165	1.23826
-2.62328	-2.52036	-1.12291	-1.41586	0.642977	-0.146231	2.77684	1.99347	-0.850704	2.98801
-3.11231	-1.26885	0.186661	0.699264	-0.17454	0.812048	-0.680651	0.323766	1.43228	2.36477
-3.06293	-2.25463	-2.03395	-0.581593	2.21283	0.0470304	2.34137	-0.329126	1.31025	1.19608
-3.16896	-3.89946	-2.21399	-0.975174	1.48302	0.889522	2.06414	0.746234	2.96282	2.06766
-4.53996	-2.88996	0.146035	-3.07059	0.567243	1.46595	-0.800909	1.37278	3.30817	0.864501
-1.78192	-2.31782	-2.11101	-1.30021	-0.335218	0.874631	-0.433062	1.75824	2.12862	0.371997
-2.22357	-3.07138	-0.472419	-2.04379	1.96847	-0.0404261	1.3477	0.637258	3.04571	2.73316
-2.93168	-3.0677	-1.49416	-0.829615	0.399966	-1.35175	2.33981	0.77915	2.20627	1.66314
-1.78877	0.0476548	-2.47977	-3.16937	1.16574	-0.520337	1.09148	1.98944	2.67885	0.81259
-2.13637	-3.36928	0.286966	-1.98748	-1.3339	0.447131	2.56597	-0.186	3.31608	1.82096
-0.727377	-2.99857	0.741878	-2.35271	-1.17228	-0.598213	0.856924	1.64112	2.00379	0.984577
-1.44247	-2.44266	-1.89157	-0.65002	0.432829	-0.998046	-1.46078	-0.159855	1.58421	1.85712
-1.91892	1.43266	-0.256605	-1.00314	1.37487	-1.14014	1.33952	2.79961	1.31369	2.12894
-2.74753	-2.58668	-0.604944	-1.93106	-0.222304	-0.0596859	1.81211	2.5545	1.84284	-0.0587785
-1.62476	-2.02195	-0.560616	-2.3302	-0.949652	-2.0838	2.22073	0.19006	2.2801	2.1281
-2.40607	-2.68841	0.0990136	-1.01953	0.101781	-0.95613	0.158537	3.3032	3.45349	2.12783
-1.40951	-0.922623	0.221038	-1.1156	-0.983376	-1.01112	0.413051	2.54448	1.6643	2.66407
-2.95208	-3.13643	-2.14657	0.899246	-0.1576	-0.96665	-0.646238	0.702807	2.30324	1.79159
-0.170094	-3.42516	-0.539032	-0.348755	0.110495	-0.743748	0.982934	-0.0190389	1.03798	4.58311
-1.28467	-1.56087	-0.855054	-2.34007	-0.612139	-1.30144	0.924432	0.711227	-0.559852	1.05603
-3.10297	-1.24051	-2.58985	0.25721	-0.271749	0.135201	1.36011	0.0811557	2.78619	1.33992
-3.10322	-3.08955	-2.44571	-2.27761	0.0134192	-0.172472	1.01692	0.398402	4.10691	1.01936
-3.38955	-1.16572	-1.83919	0.0753207	0.69136	-0.989668	1.55757	2.57973	1.91961	0.979392
-2.44935	-0.914749	1.63019	-1.58288	-0.496028	0.425832	1.01954	1.56613	2.05322	2.58843
-2.81014	-1.38534	-0.200653	-0.935154	1.51019	-1.16781	2.65272	2.20191	0.942109	1.65207
-0.592589	-2.08601	-1.88027	-0.21638	0.46003	2.75566	1.55559	1.54567	1.39991	0.0103751
-3.12545	-2.34257	-1.81377	-1.97102	1.18801	0.675324	1.83825	1.58056	1.97779	2.35957
-0.743263	-1.26091	-0.0761351	-0.578259	-1.28729	0.18061	3.18639	2.1582	3.40176	1.20904
-2.38599	-3.74437	-1.13454	-1.88293	0.964258	-1.40634	1.70852	0.64108	-0.259615	1.52034
-1.28446	-0.369094	-2.25602	0.165088	0.734357	-0.706152	0.10892	2.49727	3.35875	2.80588
-0.351406	-1.56721	-2.09446	-1.24624	0.0375571	0.126728	1.15349	1.58482	2.98851	0.468674
-2.19103	-2.78612	-3.02495	-1.61695	-0.777985	-0.0433138	-0.212053	2.12102	2.27619	1.81382
-2.5726	-3.64975	-0.940801	0.162481	-1.34749	1.7728	1.27982	1.41361	2.63439	1.8319
0.134552	-2.02696	0.645075	-2.56813	0.719888	-1.13817	2.90043	0.213922	2.1993	0.922801
0.384405	-2.0745	-1.91434	-1.89591	1.72881	0.5879	1.67658	3.96575	2.61123	0.849192
-3.61832	-0.138435	-2.12869	-1.47961	0.0162433	-0.370757	1.21362	0.553877	0.992668	2.09652
-2.85983	-2.43791	-1.90037	1.25879	0.16031	-0.399226	3.29129	2.55716	1.4642	1.7003
-0.351449	-0.541227	-0.0472044	-0.420383	2.23405	-0.130848	0.100094	0.206778	1.59864	2.83184
-4.02621	-1.99895	-0.166629	-1.52861	-1.86863	-0.185778	0.180073	-0.83361	0.689897	2.1365
-3.08954	-1.46086	-2.02783	0.0477624	1.42614	0.172576	2.41196	2.05667	1.06498	1.24761
-0.187823	-2.51749	-3.99349	-0.412809	-0.967178	0.138561	0.352763	1.63082	2.26896	1.68809
-0.506777	-2.92864	0.613186	-2.59949	-1.27702	0.0308679	2.39064	1.52316	1.92412	0.477191
0.172271	-2.82565	-1.16477	-1.40946	-0.276825	2.07833	0.54029	-0.0680704	1.5748	3.3302
-2.46334	-1.70304	-1.11767	-2.58174	1.33925	0.329486	1.13187	1.08725	2.06106	1.28357
-3.40059	-0.450391	-1.48551	-0.782292	-0.440811	0.558393	2.25988	1.83844	2.32929	3.17103
-3.07002	-1.38605	-1.07161	-1.04066	-1.14598	0.656373	1.88604	1.91779	1.84539	2.08256
-3.28913	-1.89022	-2.1192	-0.250788	-0.964771	-0.668051	0.804131	2.07016	1.32906	3.00476
-2.01053	-2.38824	0.203534	-4.31084	1.55721	-1.19314	0.418616	1.44172	1.06645	3.34005
-1.51078	-3.11683	-0.24826	-2.99796	0.308633	-0.536927	0.697368	0.619476	1.45439	2.51309
-0.478134	-1.79755	-1.19244	-1.62805	-0.125314	-0.938269	0.245697	1.99714	2.37596	2.17534
-4.79144	0.00556158	1.00356	0.556552	-0.783228	-1.4173	2.32071	1.65795	3.07045	1.13714
-1.54729	-0.446435	-2.60508	-1.7879	-0.86116	-0.738253	0.146727	-0.971379	2.06458	1.24638
-2.17694	-4.26262	1.03019	-2.3209	-0.238874	-1.40232	1.66897	0.202798	0.967651	1.055
-2.41972	-3.22607	0.668782	0.53727	0.65079	0.606209	1.49285	0.440906	2.76033	1.77896
-2.03848	-2.48273	-0.287298	-2.13021	-0.606107	-0.184312	3.43348	-0.277071	1.85236	3.25327
-1.79099	-3.76441	-1.88956	-1.98288	-0.427651	-1.51569	1.92833	1.21448	2.05585	2.49561
-1.94622	-2.45958	-1.71824	-1.47559	0.860694	0.253853	0.177994	-0.134593	2.524	0.460648
-1.36649	-3.6923	-1.26652	0.303282	-1.24416	-0.216466	0.489453	0.842577	0.560652	1.86874
-2.42507	-0.341601	-1.38332	-1.31672	0.611995	-0.277816	1.20176	1.78237	3.20493	-0.0562456
-3.18106	-1.26195	-1.60215	-1.82561	0.191029	-1.67188	0.939921	0.291096	3.66652	2.59919
-0.669494	-2.01009	-0.306591	-1.47834	0.800337	2.32513	1.20908	2.94852	3.03558	2.04646
-1.01149	-0.95856	-0.623608	-0.930493	-0.740899	0.24044	0.690662	0.682115	4.03648	1.65759
-0.430244	-2.36783	-0.669503	-1.88974	0.56511	-0.292036	1.56162	1.81786	2.97934	0.691065
-2.1123	-1.19588	-1.91451	-0.880322	1.28039	0.393252	3.42247	0.468609	2.68963	4.04931
-2.74564	-1.95195	-0.288354	-3.85753	0.249354	-0.78772	-0.636768	0.449708	0.969042	1.34523
-2.69857	-4.32904	1.19434	-1.60894	0.539485	0.0297394	1.95953	0.363587	3.77683	1.93485
-1.66508	-0.29757	-0.455178	-0.105359	0.749508	0.257336	0.618609	1.43709	2.53279	2.55597
-2.37206	-1.9157	0.417555	-0.0434643	0.678577	0.518017	1.24017	2.3826	1.71095	1.38343
-2.4531	-2.74096	-2.14208	-1.02225	1.01152	-0.595344	-0.509297	1.2546	1.30001	1.22778
-1.8639	-0.927069	-1.50188	-2.0883	-1.21432	-0.241514	1.68998	0.461172	0.436779	1.57125
0.215843	-1.17352	-0.495919	-0.786269	-0.460321	0.565357	1.28042	0.659902	-0.220525	1.67722
-2.96136	-3.42702	0.348734	0.524296	0.272415	0.689814	2.06283	0.328354	0.336074	3.18934
-0.693169	-1.68329	-1.01343	-1.01253	1.05379	-0.626164	0.262075	2.13916	1.86624	1.58285
-2.61046	-3.05617	0.198171	-3.43463	0.809872	1.67671	0.238087	0.878747	0.901116	2.14709
-2.80772	-0.766575	-0.958628	0.0696476	0.836021	0.552696	2.30122	1.38299	3.24881	1.38042
-2.02236	-3.40047	-1.93594	-1.36511	-0.432493	-1.48141	0.573794	1.1194	2.61406	0.380895
-1.12742	-1.6899	-1.14054	-0.410818	1.59328	-0.547806	0.968987	1.34699	1.78795	3.59245
-2.29113	-1.39228	-1.89794	0.41099	0.877727	1.17444	2.67406	0.989316	1.8199	0.480618
-2.82768	-1.0361	-0.2187	-1.96561	1.44258	0.0513655	-0.663762	2.63151	2.31464	1.66807
-3.42486	-2.90344	-0.113514	-0.467226	-0.524818	-1.61915	0.257575	0.359873	0.708656	2.73917
-3.37688	-2.41656	-1.66597	-1.71266	1.00258	-1.99229	0.96025	1.42039	1.66371	1.20991
-2.75745	-2.36265	-2.01114	-0.58654	-0.704275	1.02014	1.43934	0.704938	1.42658	1.74126
-1.99523	-1.44575	0.86182	-1.74261	-0.246419	1.88221	-0.346685	1.70216	1.34569	2.63587
-1.85347	-1.74814	-0.395571	-0.249423	-0.691485	2.72261	1.14922	1.76315	1.56941	1.85447
-0.395676	-2.26649	-1.16302	-1.1028	0.875919	-0.0452587	1.10565	1.56287	0.967366	1.71568
-3.45834	-1.04862	-1.44098	-1.27907	0.560127	-0.068952	-0.334396	1.15704	2.66992	2.41688
-0.16413	-1.81271	-1.38145	-1.24076	0.190909	0.180231	0.71319	0.486503	1.41234	1.00021
-1.16047	-2.65562	-2.2691	0.540845	-0.0772761	0.0319458	1.08337	-0.318067	0.740406	2.0753
-1.81432	-1.36297	-0.917978	-2.46698	0.374462	0.315113	0.927882	1.66717	1.40953	1.22849
-1.62142	-2.5397	-0.387966	-1.68567	-0.258218	-1.41498	0.563539	0.619583	3.06507	1.72977
-0.36937	-1.82718	-1.86745	-1.39632	0.991163	-0.626959	0.525766	0.204906	3.36944	3.36836
-1.0698	-1.59422	-1.64574	-0.340288	-1.4388	0.456086	1.31603	2.3019	4.08175	1.43543
-1.12633	-1.06675	-0.0667921	-0.377979	0.336505	1.37304	2.24739	1.9694	1.83225	0.627093
-2.21616	-1.16632	0.354883	-1.10494	1.04994	-0.000116823	1.29305	0.575225	2.2989	1.93264
0.160456	-0.00100799	-3.58268	-2.16568	-0.74346	1.37776	0.626861	0.988596	1.61485	1.8524
-1.23596	-0.312745	-1.42061	-0.924752	1.06973	-1.65078	1.11052	0.955544	2.56201	2.31826
-3.30797	-0.527604	-1.09898	-1.42466	-0.356427	-0.677392	0.73199	0.328851	1.10926	3.51242
-1.92512	-3.78694	-1.14386	-0.00515694	-0.539056	-1.29505	2.209	-0.687012	2.21502	2.09985
-1.83479	-1.0237	-0.0874133	-0.475997	-0.665928	-0.940013	0.738375	2.13214	1.36655	2.43355
-2.69603	-0.0628684	-1.83741	-0.224541	0.0587851	0.314353	0.960309	1.5922	1.74466	2.26469
-0.650772	-3.27511	-0.321696	0.166281	-1.46686	1.5438	2.37838	1.97499	2.91448	2.34288
-0.99091	-1.88803	0.262907	-0.0283153	-0.484942	1.46619	0.516472	0.0505451	1.32314	2.64202
-2.55168	-2.31663	-0.920985	-1.09047	1.2809	-1.63565	4.5331	0.130601	1.78503	0.821748
-2.445	-3.21627	-2.42035	-0.924643	-0.0766643	0.0489074	0.0299699	1.49425	1.74524	1.34156
-2.44832	-1.30731	-2.49902	-0.277413	-0.24172	0.625473	0.959247	0.347392	3.67707	0.49066
-0.574058	-0.541662	-0.604168	-1.68078	1.48422	0.701646	0.452011	0.934883	2.70751	2.3358
-2.57336	-2.11725	-0.702418	-0.379543	-1.0464	-0.707112	2.47298	0.994637	2.94099	2.10286
-2.85937	-0.969998	-0.896857	-0.380147	-1.1603	-1.17256	0.812805	1.25829	0.765934	1.4552
-3.64815	-3.36328	-1.60997	-0.962767	-0.14507	-0.244297	2.09359	1.86766	0.994001	0.0711209
-2.63585	-1.74853	1.00552	-0.765863	-0.104193	-0.495112	0.196552	1.68513	1.35384	2.25663
-2.32115	-1.96694	0.563209	1.35122	-1.1998	1.48166	0.471337	0.600866	2.83354	1.67356
-1.95247	-1.76672	-1.92091	0.687395	1.15082	0.50384	0.309653	1.42431	1.96822	1.6948
-3.03446	-2.33936	-2.75941	0.39787	-0.943318	2.4835	-0.14588	0.764105	2.38195	1.35683
-1.42239	-1.71977	-1.70962	-1.79393	1.19421	-1.06512	1.91124	1.33054	1.21134	3.35253
-0.906693	-2.74622	1.23023	-0.886704	0.00922335	0.958879	1.74663	0.21131	-0.865725	1.68866
-1.09374	-0.533375	-1.13521	-2.79133	0.164907	-0.23969	-0.243158	1.75242	2.43187	1.02077
-2.14259	-1.73407	-2.13198	-0.966731	-0.612014	-0.0158533	3.17886	0.20106	2.41102	3.03533
-1.77481	-1.46433	-0.271773	0.774906	-1.03565	0.587942	0.20274	1.32082	3.52634	2.6079
-1.61208	-0.530512	-2.4072	0.31452	-0.677876	0.436585	1.44432	0.181948	0.395408	3.77236
-1.48664	-1.1355	-2.1894	-0.348597	-0.377724	1.09659	0.19148	0.343489	1.77608	0.0485014
-1.66847	-3.04177	-2.58866	-2.23777	0.282213	0.357051	0.909002	0.227605	2.2845	2.08998
-1.56664	-2.22996	-1.49169	0.48331	0.561685	0.058138	1.85565	1.0268	1.98668	1.78305
-2.63509	-2.89437	-1.89287	-1.57947	2.62249	0.11588	2.66225	0.46987	3.08026	2.50121
-2.0704	-2.60746	-1.42375	-1.81722	-0.177299	-1.81411	2.26147	0.51452	0.413035	3.21617
0.0396723	-0.403228	-0.933727	-0.959688	0.278641	-0.109987	0.629739	0.740527	-0.651762	1.36492
-2.26693	-1.29084	-0.970874	-0.661328	1.95704	-0.673654	0.0230232	-0.0329312	1.24405	2.28193
-0.843038	-2.17284	-1.35515	0.0483753	-0.501102	-0.880049	-0.98503	0.440883	2.51161	0.719848
-0.151767	-1.07789	-1.51809	0.914912	-0.179503	-0.216509	-2.0326	1.36348	2.3583	1.60797
-2.10171	-3.7993	-1.77198	-0.774281	-0.0416796	0.217678	0.477546	2.08212	1.47147	2.02461
-2.96596	-1.68131	-1.92763	-0.871138	-1.05853	1.37025	2.10686	1.54138	1.14177	1.12512
-2.43826	-2.02075	-1.00106	-0.466492	-0.602986	-0.312746	1.14451	2.01867	3.45765	3.01004
-2.78731	-1.75308	-0.956901	-0.75051	0.0238477	0.611434	0.779536	2.56874	1.4527	1.43831
-2.4583	-3.55271	-3.49746	-1.02042	0.870963	-0.307553	0.600981	0.22223	2.56517	2.01528
-2.34164	-2.57203	-1.39094	-0.128736	-0.595734	-0.14828	0.444348	0.35438	1.48623	2.15592
-3.55166	-0.576823	-1.54305	-0.682147	-0.0624758	0.947142	0.437453	2.35761	1.54026	2.96408
-2.07605	-2.32687	-0.223357	-0.0902586	-1.11995	0.396608	0.893004	0.64666	0.873652	2.04073
-1.24963	-2.0826	-1.17223	-1.22093	0.341861	0.0681273	1.73145	2.01243	2.38834	1.30353
-1.23271	-3.48065	-1.21476	-1.65706	0.391419	-0.0595866	0.258583	0.364593	2.12449	2.02052
-3.03666	-1.45477	0.885768	-3.60698	1.4215	-0.109614	0.61606	0.838266	3.06233	2.86463
-0.508103	-1.96999	-0.37999	-1.2695	-0.420178	0.988678	0.511786	0.0706838	2.99115	2.80519
-1.78357	-2.82344	0.273807	-0.317362	0.128044	0.990463	0.635905	0.407385	2.42386	1.80291
-2.02994	-2.70894	-0.728721	-1.05866	-0.709739	1.15316	0.725688	-0.152343	2.03712	2.32429
-2.16024	-1.27772	-0.640081	0.978508	0.0142889	-2.43792	1.07881	0.936762	2.60833	1.37368
-3.99876	-1.78697	-2.9818	-1.55198	0.0327677	-0.840931	1.06306	2.13644	2.16987	0.85638
-2.80454	-2.64658	-1.76518	-0.706505	0.483992	-0.544751	1.50582	0.224171	1.82356	2.25466
-0.861827	-1.70456	-0.835366	-1.09447	-0.201967	0.445686	2.20441	-0.253906	2.02165	2.4417
-1.06637	-3.76377	-0.440813	-1.51735	-0.065654	-0.193906	2.12851	1.25524	3.10155	2.1315
-2.41022	-2.45367	0.29284	-1.8382	0.506164	2.77635	1.65391	-0.0311429	2.2613	0.0574338
-2.58943	-1.55977	0.280515	-1.54599	-0.304182	-0.251369	2.83028	2.03349	1.19697	1.04
-1.10408	-3.10678	-0.147142	-0.931648	0.228565	-1.24057	0.0281899	1.85213	3.16615	2.64593
-2.96266	-3.25196	-0.946598	-1.92934	-0.984428	-1.18949	2.09104	1.76899	3.64133	3.54077
-0.852393	-2.51473	0.38592	-1.26052	0.022614	-1.12646	0.597036	1.68518	3.17211	1.22522
-2.10138	-2.33221	-0.339012	0.635266	-0.990338	-0.5617	0.853731	0.0309414	2.0707	2.66701
-2.96366	-1.62674	-0.527042	0.618506	-1.80175	0.0846126	-0.915454	2.44747	4.57488	-0.462966
-1.61697	-1.05867	0.817808	1.0205	1.27432	-0.122131	0.0583234	1.08847	2.03501	3.88248
-2.22542	-2.29709	-1.158	-0.563925	-0.107584	0.406866	-0.321363	-0.678476	2.19489	1.97682
-2.58552	-0.511858	-2.21783	-1.02629	1.46434	-0.840923	0.86779	0.692393	3.16896	2.54484
-0.992433	-2.04039	-0.973365	-1.35282	1.61142	0.794425	-0.326965	2.30255	1.28343	2.42074
-1.35103	-2.58584	-0.184432	-1.899	1.78898	-0.0608694	1.36126	0.951	2.92225	2.33206
0.0544748	-2.59157	-1.0315	0.870964	0.557782	-0.129965	1.32004	1.08174	2.81945	1.22304
-2.37969	-2.37103	-0.477943	-1.25383	0.423441	-0.851346	1.40098	0.53759	1.77422	1.6034
-0.298765	-1.8524	-0.00836585	-0.808164	0.413948	0.925938	0.394206	1.02384	0.493912	0.625523
-0.915581	-2.1101	-0.277047	-1.20928	0.756814	0.109252	0.191787	2.60461	0.632619	-0.263681
-3.21297	-1.22452	-1.39978	-1.38844	0.939826	-0.213959	1.20003	1.92659	2.43743	1.29671
-2.62646	-3.31852	-1.75774	-1.25922	0.225735	0.742594	0.183964	0.0972358	2.42894	2.35345
-2.41608	-1.36834	-0.239276	-0.922355	-0.722921	-0.49101	1.26706	1.748	1.60336	2.6786
-0.235715	-3.38748	0.358116	-3.12703	2.76373	0.973767	0.470967	-0.421316	2.25365	2.29372
-4.19906	-1.06984	0.0875305	-0.382648	0.373402	-1.59301	2.71226	1.4786	2.26179	1.66193
-1.69995	-2.56347	-2.29996	0.198237	0.818855	0.272636	1.96893	1.4122	3.63706	4.82227
-1.58164	-1.27056	-1.66075	-0.312231	1.45096	-0.181619	2.34289	0.0374788	3.26301	2.0737
-0.0879313	-2.13034	-1.77596	-2.27056	-0.772144	-0.368084	1.71249	1.61842	0.275599	1.51828
-0.7202	-2.45176	-2.39428	-3.52838	-1.07625	-0.0930476	2.65698	-0.109822	2.22075	2.05171
-2.50967	-1.57623	-0.665886	-0.156528	0.590198	-0.592374	1.19814	0.896387	2.73719	1.57417
-3.11497	-3.30196	-2.55581	-1.47576	-0.560718	-2.14683	0.951927	0.560979	1.46322	2.3442
-1.03681	-3.96308	0.0799098	-2.2654	0.0616136	1.59368	0.612955	2.02446	3.10717	2.38995
-1.88665	-2.32474	-1.40893	0.285208	0.272342	0.562292	0.620804	0.70101	1.19646	0.75063
-2.37302	-3.33231	-0.79689	-1.72733	-1.175	-2.14625	0.21403	0.733452	1.19846	3.5005
-4.0359	-2.66091	-2.65293	0.115023	-0.683205	0.274766	3.90273	0.201755	1.77451	2.74055
-3.16522	-2.42542	0.43637	-2.68014	-1.45423	1.47511	1.2984	1.13023	2.12298	1.06897
-1.91196	-2.74176	0.813203	-0.92584	0.246163	0.418333	0.719675	0.253116	1.19022	1.07822
-3.07253	-1.70996	0.502451	-0.621793	1.46742	1.41823	0.0517801	-0.987575	2.98305	1.36885
-2.76183	-2.95953	-1.38514	-0.435378	1.58531	-0.734	0.908526	0.895356	2.27669	2.57371
-2.29915	-1.71451	-1.47864	-1.8753	0.0644668	1.03543	2.46118	0.694674	1.04479	2.69797
0.108748	-0.386438	-2.27123	-1.47703	0.465629	-0.943014	-0.736107	0.126396	0.715047	0.467814
-3.26338	-3.32425	0.951474	0.128201	-0.478555	0.400956	0.929418	0.323154	3.92485	2.52292
-1.93528	-1.443	-2.27174	-3.12115	-0.907025	0.87781	2.0838	2.25557	2.29508	0.775899
-2.13171	0.172333	-0.695094	0.163367	-0.311642	0.00586723	1.02789	0.85819	1.70989	3.08516
-0.82293	-0.359943	-0.750626	0.103042	0.101061	0.266864	0.906693	0.130835	2.08018	1.23293
-2.41787	-2.89688	-1.16584	-1.10226	0.937636	-1.38992	1.49473	3.80533	1.34571	0.172035
-3.07029	-2.11378	-0.201002	-1.46637	-0.465585	2.2261	0.586744	-0.135859	1.14927	3.996
-3.25835	-2.63379	-0.604165	-2.60122	-1.13854	1.90997	1.29255	-0.698189	1.76446	0.784554
-2.43077	-1.05572	0.0153514	-1.37025	0.642828	0.816791	0.511349	-0.491718	0.533562	1.51101
-2.47288	-3.40706	-2.2195	-0.941338	1.05362	-2.37289	1.14944	0.677929	1.62993	0.431186
-2.44747	-1.81142	-1.4248	-1.26116	-0.272393	0.0895182	0.214238	0.218075	0.229419	0.967476
-1.43908	-2.92166	0.569913	-2.15021	-0.67673	-1.25322	1.72633	0.872111	2.30494	0.475608
-1.35262	-0.613174	-0.372129	-1.77325	-1.58574	-1.33387	-0.0548258	1.15123	0.500755	1.46042
-1.51048	-1.7612	-0.758948	0.112255	0.523609	1.28387	1.15161	1.33782	1.85157	2.12413
-2.44811	-2.6108	-0.964808	-1.5992	0.472822	1.24353	0.669005	0.51108	0.705773	1.08398
-4.02995	-1.39205	0.262507	-0.583952	-2.08366	0.327321	1.68245	3.23804	1.66531	1.1914
-2.35411	-1.84742	0.74556	-0.705881	-0.564821	0.20815	1.23327	0.389682	2.59648	0.782466
-1.49873	-2.7864	-0.693161	0.280323	-0.756473	-0.56621	2.12727	0.909614	2.86154	2.06391
-0.983004	-1.88689	-0.0742213	-0.848834	-0.559619	-0.111908	1.16415	1.55351	3.29811	1.66709
-0.503005	-1.83106	-1.45262	-0.951186	0.827167	-1.56054	0.739525	0.33638	1.89288	2.54489
-1.68138	-2.27338	0.193831	-1.7895	-0.713127	-0.179312	2.57295	1.29968	1.74985	0.205294
-0.523586	-4.10349	-0.630078	-0.496794	-1.00905	0.635988	-1.65906	0.729457	1.01212	3.18371
-2.53283	-2.30505	-1.88651	0.167259	-0.420595	-0.902506	0.682087	1.05198	2.3443	1.612
-3.53042	-2.7947	-1.78115	0.0615671	0.457844	-0.0589402	1.94287	2.11874	2.81079	3.5194
-4.17212	-1.80961	0.353537	-0.898996	-1.06569	-1.57699	0.967733	1.9331	1.36157	1.56541
-3.40523	-1.63014	-1.60791	-0.40389	1.31285	1.78257	1.23529	1.84906	2.77365	2.61409
-2.26178	-2.83271	0.0732412	-0.470712	0.555602	0.6898	1.38699	0.597335	1.98088	2.16214
-3.55378	-2.68285	-2.38372	-3.01874	1.03054	-1.06362	0.698623	0.418909	3.05352	1.48005
-1.68938	-2.12545	0.871302	-2.03774	-0.0242598	0.627371	-1.98629	1.73329	2.4936	2.79827
-1.33376	-2.78833	-2.19015	-2.42157	0.830519	0.137103	1.14612	1.40316	1.83541	1.5115
-0.394006	-2.23795	-1.28942	-2.05469	0.957293	-2.31694	-0.0571021	1.38879	1.47664	1.09871
-2.8452	-0.689841	-2.58509	-0.737955	-0.0956391	0.724524	1.71327	1.58895	3.29118	1.50748
-0.642434	-2.09017	-1.48179	-0.674278	-0.0667483	-0.75119	0.0172206	0.937843	2.4981	3.79683
-2.4843	-1.08993	-2.40593	-0.39516	0.805457	-0.169725	1.83848	2.10882	3.24884	1.75646
-2.89414	-1.06481	-0.226325	-0.523072	-0.0412302	-0.570761	2.19001	2.50375	2.4935	1.36354
-3.38718	-2.08339	-1.29305	-1.48847	0.630087	0.506609	-0.199023	2.95495	1.31795	3.38339
-1.98824	-0.791901	-0.204648	-1.3782	-0.701849	0.366757	0.0426619	0.425386	1.77731	2.70522
-3.82922	-1.76556	-3.17282	-1.50203	-0.780186	-0.876635	0.945519	2.12433	0.763432	2.91571
-2.12071	-1.99709	-0.255072	-2.71546	-1.15184	1.20422	1.04279	0.437437	2.68206	2.565
-2.88411	-3.30189	-1.63755	-0.999197	-0.971109	-1.12591	-0.620909	0.898616	0.246208	0.100965
-2.46314	-2.24166	0.14341	-1.06869	-1.89515	-1.03132	0.968224	2.26132	1.82563	1.02499
-0.524817	-1.88862	-2.33036	-2.49502	0.298052	-0.306075	0.0423898	1.78031	2.97144	2.67515
-2.00428	-1.30165	-0.924217	-0.391675	-1.47388	0.0663028	1.21282	-1.38086	1.44413	1.35637
-3.61185	-1.27743	-1.07827	-1.08983	-0.418548	0.748646	0.902411	1.64962	1.86814	1.13883
-1.08462	-1.09286	0.778001	-1.3058	-0.0534439	0.317283	-1.34064	0.054475	0.987098	3.3258
-2.33299	-3.23525	0.517213	-0.88669	0.886036	1.8055	1.05602	1.13785	0.812939	2.24066
-2.98493	-1.75255	-1.85636	0.0737702	-0.187798	0.430463	-0.514229	1.40553	3.10033	1.79535
-1.46324	-0.72345	-2.24771	-1.23095	0.593708	-0.549741	0.206758	0.907181	2.6232	1.6581
-0.478566	-1.12875	-1.64605	-1.11842	-1.83753	-0.853429	-0.37116	1.38366	2.5134	1.8921
-1.96607	-1.73508	-2.61329	-0.912444	-1.42053	0.999831	0.818154	0.64107	1.55934	1.9227
-2.23531	-0.945132	-1.68696	-0.70935	0.408885	1.07634	1.17465	1.573	2.91301	1.02354
-1.40573	-1.78414	-0.914226	0.804939	-2.09193	-1.03228	1.42102	-0.468501	3.54858	1.21743
-3.2556	-0.953339	-0.021637	-2.17715	0.521621	2.28707	1.26097	2.57323	2.65652	1.19482
-3.52689	-0.768218	-0.53736	-1.2878	0.411936	-0.504163	0.609901	1.87801	2.83668	3.03764
-1.01537	-3.58707	-1.15818	-0.211563	1.16409	-1.87943	2.58153	0.365993	3.59872	1.86347
-2.04846	-3.24139	1.19298	-0.819398	0.787349	1.98359	-0.363787	1.65052	2.2627	1.59592
-2.14462	-1.44483	0.049035	-1.58652	-0.486848	2.68164	1.82833	-0.136583	3.83656	3.02699
-2.13664	-3.36387	-2.7363	0.495206	-0.484809	0.243185	-0.704805	0.855612	3.7553	0.897335
-1.73917	-1.74051	0.023852	-1.51493	1.73095	-0.728797	1.3798	0.168605	3.48988	2.94233
-2.02723	-3.04514	-1.21395	-0.727301	0.232685	0.243103	1.33926	-0.0117847	2.38953	1.52885
-2.34978	-1.73147	-3.13692	-1.84225	-1.33418	-0.68199	1.07735	1.05442	1.46766	0.0861784
-2.15505	0.112622	-1.85023	-0.19912	0.593123	1.89646	2.13705	1.30453	1.84256	1.88733
-1.74392	-2.20676	0.584839	-0.936491	0.865815	0.272739	0.398437	2.03864	2.25483	1.88584
-1.5174	-3.10543	-2.08512	-1.50702	2.28673	0.816493	1.3681	0.159951	2.63858	3.08997
-1.57924	-0.383206	-1.15688	1.16702	-0.564223	-0.00524184	0.0938135	1.35001	1.73568	0.792561
-2.88377	-1.70116	-0.405862	-0.401903	-0.652854	1.57537	-0.564719	1.67345	1.83242	1.42156
-1.23289	-3.69335	-0.640782	-0.767898	0.204044	-0.319533	0.437802	1.98395	2.47424	0.787348
-0.361111	-3.045	-0.977597	-2.81505	1.8497	0.247829	2.76984	1.5946	2.65579	2.47658
-2.33505	-1.61933	-1.07519	-1.2399	1.53206	-0.697609	0.0223121	-0.230484	2.13679	1.18385
-2.2326	-1.19706	0.238966	-1.0207	0.0593337	-0.014818	0.912848	1.21596	3.06947	3.1861
-1.84907	-1.43025	-1.65825	-0.989339	-0.605663	-0.0569817	2.04063	-1.64064	1.11294	2.53392
-1.92503	-0.527998	-2.2748	1.14978	-1.37578	-0.178104	-0.458772	-0.417413	3.15861	1.83872
-4.0155	-1.63591	-1.5925	-1.28189	-2.05619	1.07584	0.523116	4.27364	1.77228	0.334221
-2.30062	-2.95903	-0.855815	-1.75256	1.60969	-1.38647	3.23872	1.88856	2.88109	1.28208
-2.81161	-2.57198	-2.45321	0.258373	0.238192	-0.483487	2.29996	0.625112	0.723698	1.51779
-1.42159	-2.89613	0.362002	-3.05835	0.433816	-0.149438	0.688616	2.30904	1.29146	1.33586
-2.16318	-1.72475	-3.33981	-1.01173	-0.592075	-0.988975	0.423447	0.365069	3.77245	1.43544
-3.15579	-0.887651	-0.180934	-0.832669	-0.419355	0.844233	0.152169	0.520343	2.77323	4.19244
0.421589	-2.67402	-0.486758	-0.0828844	-0.167739	0.644639	1.85206	0.774692	0.932965	-0.280815
-1.08055	-2.30968	-1.36049	-2.10688	0.131413	0.256977	1.13449	1.74611	3.14023	0.129911
-1.46663	-2.18171	1.70713	-1.43138	-1.12717	0.258226	2.62101	0.0288757	0.95107	1.8126
0.208662	-2.32433	-1.71584	0.204667	-0.245339	0.73401	0.177543	0.519184	1.97022	1.03005
-1.20607	-1.39263	0.847653	-0.34299	-0.215758	0.815905	1.28788	1.33298	0.557951	1.73088
-3.08396	-4.16027	-0.277735	1.12327	0.742475	-0.15767	1.93292	-0.21708	2.47082	0.682776
-1.42091	-1.15548	0.200961	-0.480577	-1.29322	-0.721365	0.678311	0.780213	2.23607	2.48696
-2.53671	-2.63337	-1.54936	-2.01453	0.54045	-0.346625	0.632256	-0.609348	3.18417	1.54441
-1.0232	-1.14717	-1.9753	-1.08859	0.390458	-1.67712	0.900731	3.02873	2.30092	2.76361
-1.04412	-1.7386	-2.21396	-1.64383	-0.648638	1.34585	0.0950774	1.10641	1.72855	2.23891
-2.78828	-3.21797	1.01904	-1.5935	1.146	-0.955601	1.9294	0.772983	3.30948	4.34609
-3.99314	-2.05768	-0.954736	-0.0169754	0.21379	-0.618652	0.556696	-0.477756	1.73268	-0.567563
-0.0808312	-1.52211	0.0304227	-0.747367	-0.932457	-0.086387	0.973694	0.924044	3.49182	2.90745
-2.07974	-3.52075	-2.18909	-0.732052	1.28727	0.630401	0.335895	0.0719987	2.26626	2.16855
-2.66793	-1.99506	0.196809	-0.282687	-0.490748	-1.20666	0.29577	-1.15563	2.49637	1.91934
-2.22222	-1.09166	0.112196	0.516639	1.00271	0.28241	0.364653	-0.26645	1.46756	3.25059
-2.15861	-1.30469	-1.03384	-2.20395	-0.477959	1.52612	-1.52607	0.684462	2.39642	1.73357
-2.11422	-2.18977	-2.69474	-1.18306	-0.217492	-1.37197	0.478095	3.62111	3.17679	1.62444
-0.740866	-2.75198	-2.12647	-0.785627	-1.36973	0.429497	2.98572	1.65305	-0.455791	1.48537
-2.28305	-3.29274	1.36743	0.173146	-0.651344	-0.780783	2.83816	0.795396	2.68668	1.12724
-1.90326	-0.930499	-0.613178	-0.586861	0.153552	-0.608006	1.71316	2.51126	2.59959	3.87966
-1.3186	-1.26599	-0.806539	-1.45494	1.07437	-0.21118	0.113738	0.894196	2.87336	2.57767
-0.946958	-1.37478	-1.79032	-1.28763	-0.289965	-1.67928	-2.02994	1.76967	1.90217	0.253589
-1.24174	-1.59628	-0.811765	1.25504	1.63056	0.336979	2.23936	1.80823	3.18667	0.99941
-2.97539	-1.4739	-0.180239	-1.1026	0.498075	0.526421	0.787547	0.579422	1.56923	0.531331
-1.05411	-2.89191	0.328042	-0.257136	0.334452	1.4104	0.979523	0.726539	1.03148	1.8134
-1.76401	-0.917187	0.903234	-2.22482	-2.31876	0.038136	1.61803	0.0761108	1.40857	1.24439
-2.37348	-3.32111	-0.229163	0.540825	0.811765	0.082304	1.28677	1.27113	2.56298	-0.296481
-1.93847	-0.406314	-1.39826	-1.0445	1.3465	-0.169963	-1.28527	1.23975	2.32172	2.84986
-2.91295	-2.10539	1.1473	-2.37102	1.77375	-0.140746	1.74967	0.193597	2.34187	2.07596
-2.75103	-2.35897	-1.54013	-3.0428	0.262988	-1.87008	2.18092	0.342218	2.83964	1.79403
-1.76523	-0.523186	-0.771695	-1.05633	0.591877	0.854899	2.54034	1.20113	2.47072	1.35122
-2.71664	-2.70865	-0.936341	-2.3358	0.173939	0.288926	0.687467	1.61025	0.41514	1.11688
-2.8725	-3.09379	-0.857683	-0.974845	1.72849	0.0792215	0.0212138	0.825028	1.97697	3.415
-3.5347	-2.85126	-1.06909	-0.746537	-0.0193993	0.880879	-0.501077	1.09041	3.39256	2.57245
-2.10581	-1.95913	-0.885339	-1.62607	0.788081	0.111101	0.750083	1.18612	1.26896	2.64178
-0.827551	-2.8216	-1.38082	-2.53192	-1.23239	-1.11191	1.60976	0.460226	1.18836	1.58448
-2.77994	-2.75684	-0.694404	-0.23465	0.475637	0.597178	1.32501	-0.358905	2.67565	1.67491
-1.80425	-2.15847	-1.15449	-0.841741	-1.15176	1.24238	2.98698	-0.632424	0.983544	2.17576
-1.22279	-2.78914	-1.1577	-0.969647	-2.24449	-2.06512	0.796965	-0.481039	2.25412	1.88061
-1.08674	-1.05749	-2.41113	0.0959175	-2.22147	0.321605	1.02466	0.663977	3.30867	1.48661
-2.26247	-2.62254	-3.15032	-1.90759	0.329779	0.2192	2.63426	2.5655	3.15277	2.1
-1.81883	-2.79153	0.121064	-0.0228803	-0.0421684	-0.122647	2.63185	2.51999	1.05901	2.02333
-0.00779526	-1.85911	-1.13644	1.33376	0.573973	1.01682	0.992888	1.75145	4.60748	2.51497
-1.20756	-3.26711	-1.89551	-0.548815	0.930543	0.667027	1.53184	1.34222	3.4579	2.38647
-3.75076	-1.31273	-1.38715	-1.5228	-1.20173	-0.245714	3.19894	0.0318673	1.52617	0.99637
-1.48411	-2.7606	-0.574856	0.0821189	-1.34825	0.040545	-0.511496	2.42341	1.10946	3.12142
-2.56678	-2.67994	-1.14021	-1.92201	1.33198	-0.541633	3.6336	1.96736	0.234063	1.11897
-1.77217	-1.07615	0.569454	-1.4502	-0.153628	-0.258114	-0.599696	-0.614484	0.604637	1.43614
-3.54486	-1.52125	-2.05451	-1.37188	-1.45899	0.824726	0.605894	-0.768324	2.90786	2.49277
-2.87417	-2.53093	-0.586472	-0.844796	0.182059	0.207275	0.316946	1.52046	2.76271	2.69491
-2.16044	-3.36145	1.2649	-0.244592	0.602986	0.149645	2.12797	2.10595	1.36825	2.37434
0.843939	0.424977	-1.60478	-1.03215	0.43845	0.215169	0.294529	0.12931	1.49003	2.37316
-1.24773	-1.34398	-4.09783	-0.0829082	0.544905	-0.537989	2.08928	1.22094	2.90129	2.36795
-3.04361	0.377349	-1.57524	-1.71456	-1.17518	1.10992	0.743185	0.701505	3.80402	0.745799
-1.98168	-2.1234	-3.51065	0.258874	0.905202	0.186153	1.42529	2.49644	0.812871	2.90343
-0.796006	-1.7392	-0.722642	-0.526231	1.01846	-0.88107	1.09079	2.58906	3.08735	3.01926
-2.7766	-2.21892	-0.286382	-0.388423	-0.414935	0.573374	-0.613785	1.6922	1.6922	3.55074
-2.37609	-1.93534	0.125306	-0.494038	0.791962	0.465046	1.81516	-1.8844	1.87062	3.67976
-1.44554	-1.46724	0.505106	0.0231549	-0.38901	-0.331895	-0.138225	1.27818	2.65906	0.451201
-0.698798	-2.0041	-2.43418	0.664437	-0.861922	0.954744	2.422	0.888966	1.99835	3.48547
-1.04193	-0.293338	-0.692837	-2.0934	-1.37208	1.94681	0.987982	1.44577	1.99739	2.45634
-3.22602	-1.28743	-1.27178	0.500206	-1.72293	-0.122256	0.729265	0.624313	1.67592	2.52433
-3.07233	-3.50708	-3.28968	0.00846391	2.53513	-0.711836	1.88651	0.546986	2.68027	2.1113
-0.415338	-0.864516	-2.64615	-1.48357	-0.0859035	-1.5318	0.638126	0.983203	2.94917	1.87684
-1.47663	-2.47693	-1.69305	-0.964871	-0.0901742	-1.29432	2.00979	1.3268	1.70268	1.11648
-0.496439	-3.36717	-1.6267	-1.46873	0.935348	-2.00422	2.18411	1.59673	1.54337	1.40613
-1.93261	-1.51482	-0.267006	-1.2087	-2.24606	-0.456184	0.664485	-0.833546	1.06712	1.78982
-0.712873	-3.52643	-0.986707	-1.77171	-0.703604	-0.00113377	2.36946	0.410687	3.56472	1.74352
-5.06414	-1.88463	-0.819721	-0.826238	-1.3728	-0.219677	1.74391	1.36472	1.86866	2.14932
-1.68257	-1.82632	-1.78243	-0.974028	-0.550629	-0.631302	1.91146	1.17807	1.68443	1.77615
-2.87725	-2.04416	0.110627	0.396911	0.0723207	-1.28892	2.24697	2.19525	2.27738	1.19989
-3.54008	-1.57941	-3.87923	-1.61835	-0.0304045	0.0868345	0.118403	1.61567	1.83284	1.70024
-1.10741	-2.73203	0.000986128	-1.59516	-0.7619	-1.461	1.68016	1.14816	2.66796	0.0796858
-4.00394	-2.12978	-1.51704	-1.34741	0.662234	-1.27784	1.66412	-0.0964914	3.34455	3.57825
-2.1985	-2.08061	-1.05652	-1.54069	0.345374	-0.482158	1.52207	1.02552	3.13004	1.74656
-0.696425	-1.8614	-1.35941	-0.25722	0.283931	0.659443	1.20935	1.82743	0.654849	0.352176
0.0841228	-1.61926	-2.65736	-1.52721	-0.615569	0.717748	-0.0366214	-0.286498	0.672881	2.92153
-3.08723	-0.866387	-1.38034	-0.0505876	-0.391126	1.03466	-0.695399	0.0718225	1.79247	2.38546
-2.09034	-2.48877	0.00923111	-0.770111	-0.453483	0.568611	-0.036934	2.14601	3.54784	2.40537
-1.7206	-1.88522	-1.6641	-1.42201	1.16494	-1.22397	0.72427	1.26619	2.54141	1.23222
-3.55859	-2.84952	-2.40366	-0.080458	1.62527	0.669738	0.564063	1.3415	2.00046	1.66541
-0.847993	-1.82407	-1.9875	0.161717	1.05099	-0.751971	0.71991	-0.840431	1.49796	1.71206
-1.36101	-0.979847	0.609634	-1.55466	-0.826864	0.0238704	0.939569	-0.985956	1.21667	2.7127
-0.207387	-2.6391	-1.06792	-0.384692	-1.70977	-0.607621	0.883477	1.01795	2.66923	2.03012
-2.7034	-2.92451	-1.12809	-1.77474	0.396505	-0.615314	-0.94314	1.06572	1.77428	1.68388
-2.60045	-2.91259	-2.50362	-1.27079	-1.28896	0.231274	-0.328108	1.07876	2.29819	3.8835
-2.015	-2.10823	-1.34908	-1.0413	-1.99193	0.428298	1.24671	0.828022	0.54422	0.654967
-1.41876	-3.19065	-0.913599	0.192356	0.172509	-3.11912	2.07995	0.798333	1.52102	1.7368
-2.65382	-1.64054	-0.787194	-0.991654	0.898777	0.617924	2.24472	2.58915	-0.614416	2.94941
-1.30135	-4.31662	-1.18881	-0.74304	-1.3999	0.574169	0.700723	0.659449	1.59587	2.32687
-2.60207	-2.25362	-0.805264	-2.44617	0.531198	0.820408	2.233	-0.769349	2.83545	2.28165
-4.04115	-1.5513	-0.0949139	-0.695512	-0.0437055	-0.758915	0.361399	3.31978	0.0796158	3.25787
-0.795872	-3.9431	-0.989961	-1.55076	2.18803	0.238251	0.889897	1.755	0.851853	2.23786
-3.56493	-1.04782	-0.373314	-0.533748	0.972072	-0.90335	-0.0823866	0.172126	1.24965	1.60807
-0.864661	-3.27278	1.11337	-0.564135	0.313548	0.834256	0.778372	0.842426	1.9325	1.58587
-2.98762	-1.34058	1.39767	-0.469476	-0.573387	-0.229396	1.0333	1.37431	1.03613	1.02779
-2.24302	-2.52132	-2.007	-0.200965	-1.24827	1.52964	-1.04651	0.831133	2.04688	0.797709
-0.405863	-1.7022	-1.17121	-0.317029	-0.169907	1.04584	1.30611	2.54511	1.30813	1.45152
-3.81945	-1.74669	-1.60885	-0.100354	0.485372	-0.559388	0.793865	0.594769	1.01522	0.609965
-3.40526	-1.25794	-0.906244	0.492389	-1.13949	0.340031	-0.386553	-0.0229998	1.84001	2.72854
-1.01801	-1.56144	-1.17415	-0.660205	0.403288	0.785353	1.45333	0.339967	3.7752	1.49516
-1.07218	-0.0357205	-1.5868	-1.79999	0.33163	-0.961171	-0.55305	0.174269	2.31507	1.89628
-1.27332	-2.37196	-1.06165	-1.57521	-0.962064	-0.1078	1.38412	0.474177	3.37278	3.63801
-3.0933	-1.77555	-1.27512	-2.50482	-1.17168	-0.911804	0.96144	0.295671	1.0131	1.19786
-3.03504	-3.43875	-1.30746	-1.34326	-0.489262	0.373287	1.53087	0.798895	1.52493	1.77112
-2.46185	-3.77832	-1.69665	0.59922	-0.452717	0.372135	2.67268	1.74286	0.596332	0.703508
-3.30047	-1.49884	-1.4949	-2.09765	0.646346	-1.30437	0.0862294	0.718449	2.37273	1.84077
-2.47526	-2.30663	-0.606109	-2.15861	-0.143294	1.82459	-1.72532	1.24136	2.902	2.2714
-2.02592	-3.95419	-1.07446	-1.64833	0.170809	-0.519226	1.73633	0.869487	2.87156	-0.767445
-1.81378	-2.00383	-1.9061	-0.140744	-0.0649504	2.14406	-1.62465	1.8533	2.3325	-0.0896475
-2.04521	-1.65715	-1.51658	-1.70657	-0.059469	0.970744	2.00762	1.61154	0.139085	1.45787
-4.16493	-0.0881705	-2.0657	-0.892796	0.171158	0.800285	0.215768	1.7294	1.31908	2.10518
-2.30335	-3.43421	0.184307	-0.714436	0.827984	-2.27646	1.27445	0.187325	1.93826	4.1986
-1.88847	-3.27117	-0.949803	-0.115015	-1.10476	-1.50357	0.283917	1.12524	2.38765	1.57644
-1.93361	-1.4594	0.0761428	-2.35979	-0.451408	-0.463363	0.292536	2.29371	1.64716	1.99231
-3.3189	-1.15457	-1.24691	-0.108868	-1.20038	0.319401	1.83957	0.497524	2.06396	1.60564
-1.86891	-1.65092	-1.12227	-0.983106	-0.957971	1.14301	0.647098	0.0273014	2.46841	2.05268
-1.59593	-1.48757	-0.897264	0.451255	-0.151234	-0.0258073	0.246818	-1.23784	3.82439	3.06377
-0.879638	-1.13955	-3.05586	-0.609912	-0.826349	-0.644723	2.02235	-0.255398	2.66068	2.97347
-1.51309	-2.76434	-0.0821407	-0.345474	0.695164	-0.483523	0.775102	0.315052	2.88589	1.30353
-1.71367	-2.55783	-1.54905	0.347176	0.914568	-1.19373	0.473133	1.19139	0.603426	0.597089
-3.44875	-2.04138	-0.985895	-1.28816	-0.793236	-0.548562	0.174846	2.36598	0.985507	4.08109
-2.91281	-0.864859	-1.33338	-0.31945	0.00269766	0.405389	-0.0471571	0.62971	1.45267	1.72722
-2.03771	-1.95474	-0.0994686	0.920183	-0.270165	-0.43892	0.393712	1.94831	2.73183	2.00522
-1.22479	-2.41812	-0.529172	-0.742122	2.10138	0.847773	0.739695	0.427586	2.71893	1.04797
-2.25659	-0.835329	-0.858817	0.398315	-0.907562	0.41751	1.69306	-0.342847	2.77365	2.84438
-3.38368	-2.86696	-3.28483	-0.33566	-0.886014	-1.86295	-0.187629	1.10144	2.67229	2.6506
-2.13369	-1.21521	-0.236517	-2.1194	-0.943358	-0.268184	0.281078	0.221324	1.92376	2.57477
-1.75021	-3.15752	-0.119252	-3.04974	-0.450269	-1.30865	0.0804549	2.27467	1.61205	1.13305
-2.91977	-0.30554	-2.26131	1.00103	1.03934	0.852678	1.77412	0.664878	3.99396	0.799889
-1.68373	-2.61844	-3.34067	-0.530074	-0.325776	0.825763	0.193155	0.833853	2.35147	1.92733
-2.48428	1.74025	-0.120683	-0.882411	-0.13174	-0.266348	2.57241	-0.78354	0.677469	2.15343
-0.659728	-3.63647	-0.694495	-0.96717	-0.0274671	1.33713	-0.683032	1.55477	0.993682	1.65606
-2.45877	-1.27718	-0.71229	-0.0835352	0.816302	0.73068	0.681749	0.345978	0.723355	2.20666
-2.27548	-0.860947	-1.3461	-3.83946	1.52753	-0.201681	0.410889	3.10898	3.39722	0.749912
-0.23575	-1.99244	-0.0280481	-1.24987	0.772174	-1.17357	1.36722	1.67896	2.51816	2.2163
-1.70526	-2.16866	-0.259607	-1.87674	0.254908	-1.04591	0.679471	1.07302	1.47059	0.828087
-1.1172	-0.500075	-1.48068	-0.435234	-1.07376	-1.04634	1.9523	1.38952	1.57824	1.74677
-1.0656	-3.08298	-3.29046	-1.59979	0.324087	0.238583	0.458902	1.80725	3.24934	2.86257
-1.24564	-2.57875	0.726622	-2.06099	0.982151	-0.783993	0.191945	0.569076	2.01064	1.46917
-0.251638	-1.52372	-0.89187	-0.405713	-1.27259	2.43123	0.324381	1.50508	1.16042	1.18909
-0.941871	-2.02106	-0.848468	-2.60771	0.92186	-1.56481	2.61392	-0.243215	1.26602	0.312155
-2.03234	-1.56922	-2.57878	0.270988	1.39369	-0.0438628	-2.69789	1.72992	3.04968	2.68029
-2.0308	-0.421086	0.186503	-1.90123	0.633669	-0.497785	0.511165	0.108425	4.72756	3.69805
-3.1422	-1.31458	-0.899379	-0.223861	1.6053	-1.55073	-1.91559	0.445721	0.0839901	3.48856
-2.58666	-1.13895	-0.738235	-0.90891	-0.640935	-0.395948	1.87946	0.332434	2.82536	1.40708
-3.79712	-0.713874	-0.269557	0.0918889	2.09453	0.286816	1.40443	-1.03375	3.68063	2.91065
-2.30937	-3.23367	0.690156	0.516282	-1.09609	-0.394649	-0.25053	0.932643	3.60931	0.146224
-1.28332	-2.19178	-0.421252	-0.745622	0.853618	0.361863	0.675341	1.12909	1.66427	3.52338
-1.72286	-0.772091	-1.23173	-1.20282	-0.0181517	0.153857	-0.431592	1.49589	1.98102	0.714183
-3.09119	-2.73638	0.202075	0.436476	0.254225	-0.430799	-1.34722	0.977116	1.82883	3.32592
-1.91959	-1.43248	-0.862013	-2.19696	-1.43652	-0.404006	1.42534	2.66331	3.33979	3.84924
-2.70361	-2.79315	0.525617	-0.931678	-0.437711	-1.41336	1.14925	-0.715429	1.05586	1.59231
-1.22866	-1.01636	1.00211	-0.865042	1.0227	-0.672375	-0.559496	2.24364	2.32817	3.62527
-0.602727	-2.29514	-0.792126	-0.0164867	-0.00865268	-0.0987661	0.397834	1.68261	2.49933	2.45774
-4.58223	-1.47661	-3.09261	-0.866093	0.716607	1.2168	2.70872	1.44602	2.7686	1.93601
-1.24007	-3.46682	-2.14011	-0.251198	0.522373	-0.598256	0.129731	0.1904	2.76235	1.49614
-1.90962	-1.72469	-2.25688	-2.22454	0.758685	0.120377	-1.75781	3.01026	2.4503	3.5529
-1.65965	-2.46469	0.308732	-1.78922	0.445582	1.49703	2.59596	1.38399	2.96776	0.692228
-1.91657	-1.39961	-1.96868	-0.651053	0.0919948	-0.0695037	1.33179	-0.552038	1.80583	2.29388
-3.77617	-1.08892	0.272536	-0.487416	-0.237149	-2.20352	0.904143	0.236217	2.14693	1.17516
-2.36584	-1.2355	-1.67994	-0.417515	0.500897	-1.31858	-0.352751	1.29641	2.00965	2.78896
-2.70262	-3.71176	0.836735	0.430522	-0.608855	-0.460676	1.39988	0.405851	2.40888	1.82578
-0.818861	-0.358864	-0.86374	-1.2321	1.16096	-1.27588	-0.982805	0.121005	1.8132	-0.301448
-3.86053	-3.29228	-0.559528	-1.03459	0.619905	0.102744	2.1491	1.13143	0.399678	1.87305
-1.90583	-3.04936	-1.29738	-0.774694	0.144305	1.20216	2.18173	2.31409	3.3841	2.25892
-1.23975	-2.79706	-1.51345	-1.42443	0.0377143	-1.42666	1.60598	0.805917	2.45516	1.29731
-2.51758	-1.78857	0.301661	-1.0574	-0.524152	0.842937	-0.72244	-0.90151	2.41403	0.461098
-4.17823	-2.31992	-2.60369	1.25796	-0.262493	0.60269	2.03027	-0.431851	3.57988	1.6251
0.0146489	-1.41312	-1.45575	-1.26425	0.86673	-0.0558745	1.76903	2.43035	2.52598	2.44121
-2.99911	-0.953985	-1.37571	-1.84421	-1.09863	0.589377	1.79008	0.770325	3.64129	1.76308
0.0631854	-0.725332	-1.27639	-2.59823	1.30486	-0.344152	1.12617	0.912046	1.48446	2.58414
-2.58461	-2.6576	0.165366	1.17049	2.15831	3.55997	1.88778	0.471431	1.53362	3.11205
-2.37048	-3.04905	0.513335	-0.397431	0.106048	2.47454	1.96816	-0.360362	4.05781	0.417826
-1.97078	-3.00569	-1.5113	0.476408	0.509413	1.56311	0.63117	2.15852	1.90896	2.54001
-2.87524	-1.67918	-1.45252	-2.13233	-1.42696	0.00973861	2.25937	0.880292	2.35838	1.25486
-2.56362	-2.20438	-1.21456	-1.71995	-2.41508	-1.79019	1.18315	0.683583	1.98929	4.06626
0.148178	-1.63178	-1.32531	0.473489	-1.11014	0.663501	1.4193	0.136915	0.955713	1.49009
-0.809677	-1.56208	-0.973327	-2.54648	1.02608	0.514	-0.552894	0.313115	2.1343	3.0842
-1.39702	-3.34918	-0.862021	-2.91681	-0.211505	0.985303	1.55818	2.75765	3.53065	3.12928
-2.54697	-2.26225	-1.7008	-1.28978	-0.825857	0.664849	0.609193	1.06413	1.46998	1.90221
-2.44663	-2.20291	-0.821374	0.993133	0.196339	0.783779	0.0230048	1.99303	1.63245	3.2265
-1.8401	-2.22261	-1.02449	-1.9855	0.450821	0.75746	1.30449	1.32269	3.14017	2.9865
-1.31041	-2.2478	0.666983	0.515139	0.8151	0.440701	0.167156	-0.586632	0.708299	3.00856
-0.916048	-2.0131	-2.84365	-0.134367	-0.0872272	0.694591	1.36886	-2.04002	1.75112	1.4021
-2.59468	-3.25139	-0.230164	-0.629786	1.21177	0.108295	-0.148506	-0.448921	1.19269	4.23259
-2.76938	-2.25431	0.210438	0.561449	0.847086	1.44127	1.07555	0.623931	2.04455	2.56305
-0.797941	-3.27187	-0.37128	-0.447547	0.929741	0.27159	2.5553	-0.0395298	2.70761	3.83159
-0.959847	-2.09176	-0.50086	-1.247	-0.918715	0.413959	1.20551	-0.667777	3.15784	1.81411
-2.83145	-3.31909	-0.578246	-0.695979	0.312637	-0.149276	1.08711	3.01101	0.70621	1.42515
-1.451	-3.90623	-1.76022	-0.420907	0.636803	1.75054	1.8343	0.466154	3.31163	1.20597
-2.46151	-2.44036	-0.781495	-1.85147	1.64867	0.726769	1.52219	0.597802	2.85395	1.74063
-2.16313	-1.41882	-0.952599	-0.823103	-0.00200032	0.808495	0.711437	1.10654	0.384159	3.10304
-2.61464	-1.87966	0.326621	-0.381962	2.09201	0.400867	0.912024	1.38074	-0.357916	1.46147
-3.21785	-1.94231	-0.767913	-0.85578	-0.554259	1.97636	1.7686	1.76335	1.88264	1.66445
-1.39164	-2.35169	-1.2378	-1.23587	0.802979	0.0759463	2.14991	4.1237	1.27787	2.02166
-1.63133	-1.89537	-1.76589	-0.831501	-1.15702	0.347898	-0.132015	2.31304	2.47738	2.58374
-2.34429	-2.06082	0.110186	-0.717719	0.521621	1.65336	0.838148	1.16434	1.21151	1.94086
-2.19502	-3.97425	-0.845659	-2.50665	1.12641	0.348407	0.254569	2.38592	2.11707	3.30391
-3.49916	-1.56715	-2.28492	-0.348545	-0.392049	0.203053	1.25598	0.438377	3.87368	2.99606
-4.08835	-0.841618	-0.66414	-1.87963	-0.613256	-2.09461	1.5429	-0.969021	1.46161	2.13947
-3.40997	-1.96947	0.171858	-0.570821	-0.149136	-1.03865	-1.32047	0.546146	3.04283	2.61939
-1.52786	-2.63674	0.0326143	-1.38935	-0.173795	1.30172	2.2758	0.301462	2.52316	2.36621
-0.837411	-3.37085	0.557749	-0.780286	-1.86122	0.978498	2.63209	1.76874	1.50001	3.32089
-1.09323	-1.85144	-0.629888	0.165256	0.484149	-1.69361	1.10386	0.326408	3.00322	1.22532
-2.15119	-0.988304	-0.575575	-1.47492	0.190663	-0.220728	1.96547	0.360143	3.20444	3.50855
-1.46075	-3.20448	-0.091814	-2.82374	1.34294	-1.8618	0.496118	2.98417	1.35274	2.21344
-0.588189	-0.996004	-1.71895	-0.483521	-1.56019	-1.60359	0.113213	-0.205809	1.59917	3.21899
-1.89619	-1.85031	0.268196	0.482154	-0.568644	1.06837	1.09673	0.895223	1.91741	0.634925
-0.663763	-0.341828	-0.782638	-0.645629	-0.524646	0.060267	3.16095	-0.0800243	1.9626	2.18912
-1.38734	-3.16262	-0.638019	-1.96676	0.120759	1.17019	1.80154	1.93582	1.37637	1.60619
-1.87975	-1.17998	-1.12269	-1.99774	-0.442561	0.132626	1.02257	0.735148	2.42044	2.1405
-2.8345	-3.20587	-1.51589	-0.88389	0.11008	-1.28865	0.0380296	1.18486	1.97584	1.2794
-1.99422	-1.88764	-1.15152	-0.892616	-0.191849	1.14157	1.84245	0.657007	1.81249	1.30269
-1.62217	-0.769701	-2.79657	-0.764361	-0.996873	-0.953038	1.68528	2.2022	1.24784	2.70451
-4.18243	-1.90014	-0.0820861	0.242353	-0.118128	0.374476	1.47627	0.158196	2.19881	3.11551
-2.20568	-1.98425	-0.702566	-2.26285	-0.477589	-0.115685	-0.359683	1.0551	1.3753	3.19736
-1.83257	-0.97425	-1.68937	-1.47316	-0.0477925	-0.460287	0.463081	1.95643	2.89938	1.33378
-1.44107	-2.0457	-0.819446	-0.614533	-0.547121	0.244245	1.02744	1.57098	2.8224	0.106993
-1.91088	-1.89464	-1.09801	-1.49272	0.286643	0.530332	-0.505418	2.07823	2.58542	2.14485
-2.13297	-0.677986	-1.66791	0.814339	0.37697	1.413	0.255683	3.53095	2.5864	1.81688
-3.91224	-3.4015	-3.40457	-1.95776	0.71978	-2.14658	1.1195	0.666481	1.65727	0.588806
-0.402363	-1.42635	-1.11838	-0.245583	0.179746	0.12297	3.13589	-0.875088	0.520492	1.81412
-1.36936	-0.841813	-1.74668	-0.101082	1.07813	0.394441	1.05989	-0.281117	3.26226	1.35503
-4.01836	-0.560865	-0.681257	0.110028	-0.736064	0.399749	2.64005	0.47594	2.98688	3.40914
-3.16646	-2.98274	-0.885443	-1.39673	-0.968725	0.615299	1.91678	-0.338816	2.56548	3.53067
-0.963757	-3.15572	-0.271485	-0.229596	-1.08382	1.01325	0.731663	0.956484	2.5923	-0.166732
-1.46908	-0.572671	0.195127	-2.12054	0.975732	-0.61988	1.66572	0.709805	2.87936	4.4395
-2.64959	-2.58908	-0.649202	0.14017	0.875883	0.691074	-1.15658	1.56012	3.58559	2.54602
-1.32797	-1.10368	-2.25527	-0.460383	0.404269	-0.574186	1.31488	1.06062	1.39176	3.65051
-1.65827	-3.58137	-0.347677	-0.0138668	-1.29271	0.00148597	2.55358	-0.0647425	2.13628	2.38275
-0.389796	-1.37751	-0.423827	0.74409	-1.43647	0.939285	1.52236	0.688599	1.29097	3.01024
-4.35686	-2.89979	-3.05927	-0.72864	0.022715	0.260327	1.15618	0.0495475	1.40191	2.09787
-3.06003	-2.7777	-1.43511	-0.621112	0.901875	0.855287	1.69143	2.65163	2.05203	0.602192
-1.74395	-2.71523	-1.95488	-1.25867	0.351535	0.617019	-0.17702	0.453924	1.47905	1.40249
-0.775053	-0.891262	-0.299605	-1.10681	-0.0950973	-0.21361	0.117811	1.43624	0.659191	0.139923
-1.92575	-3.05323	-0.589666	-1.10905	1.36489	2.7146	1.71781	0.746389	0.357848	1.74869
-2.00061	-1.59324	-0.52271	-1.13687	-0.315598	-0.985955	2.0522	0.618729	3.19296	0.973872
-0.837543	-2.46429	-1.79797	-2.09937	1.95313	2.17996	0.863987	0.537555	2.69612	2.14118
-1.92028	-2.99674	-0.537446	-1.67584	0.821257	-0.331402	1.5749	0.781123	1.59469	0.599015
-2.46098	-0.831662	-0.697757	-0.452107	0.179723	1.83178	1.31514	1.1491	3.40645	2.92785
-0.403797	-2.34497	0.553478	-0.234699	0.0582194	0.0610427	0.587355	-1.92613	2.36791	1.4177
-2.26414	-2.76066	-0.792495	-1.08243	-0.585055	-0.774746	2.03638	1.3996	2.37589	2.53169
-3.5296	-1.62724	-1.51958	-0.961446	1.6876	0.960001	-0.909708	-0.160881	2.18411	0.797319
-1.52731	-1.39555	-0.851919	-0.924388	1.53957	-0.89903	2.46646	0.0710139	2.28157	4.68571
-1.97387	-1.47079	-0.303075	-0.223818	1.53853	0.423693	0.47359	1.85866	1.49596	2.47575
-1.83462	-0.755541	1.18511	-1.26037	1.53494	-0.678099	0.932608	0.374804	2.42249	3.19987
-1.62542	-0.548665	-1.06287	-0.286526	1.26432	-1.10372	1.30364	-0.630828	0.381557	3.34685
-0.927638	-1.64098	-1.46156	-2.03335	0.166863	0.657244	0.766747	1.84735	2.21787	0.83763
-3.2423	-1.48273	0.182684	-0.650036	0.365241	0.773121	1.59632	1.22322	1.17687	0.489596
-1.67924	-0.0813805	-0.872127	-1.36562	0.879627	0.249209	0.766352	1.14935	2.48497	2.60564
-1.25766	-3.13127	1.19915	-0.436215	0.184042	0.620315	0.897299	1.77156	2.80846	3.82917
-2.79286	-1.03606	-1.13903	-0.889181	-0.405699	-1.63816	0.978941	1.64529	2.2325	0.298461
-2.19311	-3.20289	0.549589	-1.95155	-1.88879	-1.25122	1.096	3.23916	0.828347	3.80755
-1.50924	-1.50635	-2.2785	-0.325293	0.340994	-0.615718	1.30336	0.126715	2.56556	2.93256
-2.11854	-1.1384	0.53415	-2.09285	0.613559	-1.09116	0.0206179	0.151691	0.852664	1.36601
-2.10423	-0.135185	-1.88779	0.202654	-0.807268	-1.06275	0.515377	1.31245	3.28388	1.44133
-3.09751	-1.09208	-1.60139	-1.84038	-0.133676	0.189854	0.986921	0.0388868	2.52804	3.30995
-1.00901	-0.733133	-1.21033	-1.24289	-1.56046	-1.01713	0.189896	0.504672	1.34714	3.45912
-2.12525	-2.41299	-2.36859	-0.820778	0.947619	-1.61088	2.57671	1.88195	2.01191	2.2792
-0.259325	-1.45343	-1.42818	-1.20277	-0.0774865	-0.0586365	-0.222928	0.890907	0.711534	1.43898
-2.58514	-1.16765	-1.2805	-1.82524	-1.55324	1.07757	0.35923	2.18672	2.27135	1.98678
-0.412917	-1.33362	-1.10778	-1.00488	-1.10084	-0.187167	2.10228	1.8992	2.31309	2.23966
-2.72598	-1.02058	-0.849086	0.571889	-0.235643	0.262948	1.68554	1.94531	2.17242	2.5675
-3.53753	-1.22318	0.122304	0.171203	1.81512	0.109557	2.60066	1.47851	2.82625	1.05087
-1.02167	-2.22197	-1.73457	-0.456169	-0.142957	-2.34044	1.31711	0.914667	1.96666	1.42274
-1.72287	-1.84972	-0.909759	-0.673326	-1.46729	-1.9158	0.961188	-0.112292	2.6771	2.37421
-2.5358	-2.8576	-1.43222	-0.533557	-1.18004	-0.262931	1.59252	0.404683	-0.434379	3.21553
-2.27868	-2.62201	-0.612722	-1.81899	0.374115	-0.569224	1.31729	0.269622	1.49761	1.40298
-0.486159	-3.35527	-2.25879	-1.82154	-1.23273	-0.0833623	0.0606877	-1.35169	1.87522	2.78403
-0.200788	-2.23541	-0.572579	-1.67856	0.899123	0.301036	0.812021	0.427807	2.70864	1.22468
-2.77104	-2.54425	0.908417	-0.0883314	-1.17069	-1.9086	0.542785	3.32936	1.34989	3.93098
-3.04096	-4.03217	-0.254329	0.0299515	0.342715	-0.210585	0.0223196	0.551349	3.05605	1.89059
-1.18401	-2.15365	-1.38027	-1.81641	1.58457	-0.388837	0.569537	1.26877	2.59912	0.888184
-2.83845	-3.30583	-2.02418	-1.63902	-0.145	-0.774915	0.272832	1.25235	0.329695	2.43095
-2.56283	-3.2515	-0.643792	0.391834	-0.271578	0.622743	0.23333	1.98158	1.2006	2.43609
-0.701428	-3.89628	-0.730545	-1.62285	-0.543579	-1.53684	0.63836	0.180839	0.632195	2.48759
-2.95821	-2.88302	-2.19972	-0.158218	0.895305	-2.57227	-0.249383	1.29034	2.42171	1.81211
-1.52482	-1.74623	-0.929564	-1.62433	-0.0265782	1.05425	1.4527	0.399656	2.09231	1.33138
-2.14479	-2.17222	-2.9082	-1.14821	-2.03553	-0.182415	1.17245	-0.965578	3.3801	1.82313
-1.60193	-2.79544	-0.0574195	-0.148302	0.732387	1.51935	1.28941	1.54753	0.869428	3.55461
-1.51634	-3.32276	-3.48197	-1.56147	0.970594	0.018392	-0.308889	2.34615	-0.0202379	1.25696
-1.45969	-2.50726	-2.819	1.14264	0.598615	-0.356665	1.38377	1.87061	0.657349	2.50964
-0.871621	-3.22335	-0.744552	-0.143712	-1.08957	0.234335	2.00652	1.10841	-1.94314	0.924781
-2.4535	-2.82091	-1.39282	-1.21194	-1.23401	-0.18948	1.20749	0.776472	1.85227	0.784834
-1.05978	-3.41129	-0.916961	-1.02667	-0.46654	0.935993	0.988857	1.8426	4.36354	0.838396
-1.11585	-1.53678	-1.12648	-2.79043	-0.614691	-0.653477	0.633521	0.868506	2.83058	2.07317
-1.43403	-2.68816	-1.45028	-1.15175	-0.942636	-0.0193783	1.45342	1.55184	1.95291	3.40494
-1.52466	-0.249278	-1.82082	0.153655	0.914615	-0.126358	1.88233	1.71387	1.40952	-1.55987
-2.69131	-1.74681	-2.12591	-1.48425	-1.84382	0.401973	2.1674	1.94461	3.09065	1.32347
-2.26308	-3.10035	0.256089	-1.68722	1.4913	0.358917	0.847753	1.63437	1.94844	2.38452
-2.82483	-1.47515	-2.57612	-1.44399	-0.176344	-2.00849	0.849474	0.792982	1.95355	1.41808
-2.04538	-4.45292	-0.159769	0.22167	0.904972	0.699226	1.91202	2.53358	4.34173	0.710094
-1.46771	-2.31759	-0.253158	-0.550675	1.08315	-0.598962	1.04829	0.177638	1.37073	3.64698
-1.08225	-2.64363	-1.42967	-2.18125	-0.0198974	0.760827	0.210122	0.527042	1.54628	1.90868
0.306927	-2.94875	-2.12769	-1.8787	-0.556469	0.729313	-0.971478	1.40095	2.06015	2.74663
-1.23377	-3.07546	0.973258	-1.41982	2.57601	0.115202	-0.394055	-0.475531	3.00995	1.79509
-1.80504	-3.14751	0.135837	-1.25403	0.961884	1.12514	0.974832	-0.483512	2.08937	2.62897
-0.745151	-2.0211	-0.767375	-2.34453	0.69613	0.637078	1.38172	-0.0154868	1.99637	1.48227
-0.505231	-2.09729	-1.13155	-0.32161	1.84549	0.396453	0.644071	-0.0355104	0.945574	3.41696
-3.62436	-2.84312	-0.0333286	-0.736964	-2.284	-0.123791	1.06633	1.50527	1.1534	1.99575
-2.39217	-0.618501	-1.18804	0.443121	2.02884	-0.245004	0.316854	-0.395892	2.53671	1.76532
0.729462	-2.11416	-1.88455	-0.644908	-0.353684	-0.386356	1.24365	1.13865	2.05209	0.659675
-1.68198	-0.749888	-0.921912	-1.98637	0.666473	0.0831567	1.80698	2.07522	1.07577	3.04444
-3.14131	-2.3156	0.64565	-2.14147	-1.26512	0.581043	-0.757282	0.645987	1.90246	3.43992
-1.33041	-1.64687	-1.56687	-1.14775	1.93602	-0.959407	0.371484	0.836822	1.95023	4.5889
-2.08432	-2.9774	-1.27163	-0.165521	1.47401	-0.154054	-0.310232	4.13478	0.527949	2.10723
-1.89581	-1.28712	-1.25795	-0.306774	0.420764	1.21754	0.360342	1.75442	2.26928	1.96924
-2.71842	-1.92552	-0.897746	-1.22475	-1.88358	-0.788683	0.921486	1.94068	2.07394	1.5611
0.0897409	-1.52266	-1.74328	-1.1632	0.624417	-0.393676	1.60137	0.620045	1.82365	3.30543
-1.40688	-3.03619	-1.41521	-0.717233	-0.0647529	-0.286754	1.24955	0.825072	3.32794	2.04798
-2.55088	-2.31747	-1.99804	0.0378571	-2.15634	0.370175	1.57944	1.22657	2.48831	3.403
-2.83868	-3.2091	-1.55321	-1.05285	-0.0590692	-0.0434411	1.71961	1.17782	2.99654	2.80853
-3.56577	-2.20788	0.151407	-1.20615	0.114671	0.222851	-0.618219	2.59732	1.57272	2.83697
-1.16718	-1.38322	-1.60916	-1.25446	1.26946	-2.53283	1.68787	0.0065265	1.76337	0.131671
-1.32372	-1.08791	-2.66138	-1.32659	-0.353439	1.00403	-0.949785	0.879431	0.92212	1.79315
-2.85882	-2.68327	-0.647482	-1.99298	0.0590391	-0.312131	1.89087	-0.0918756	-0.217882	2.66115
-2.23559	-2.89126	-3.12398	-2.10584	-1.05939	-0.497856	0.563535	1.3323	2.51318	3.72123
-1.75033	-2.66316	-0.438623	-1.07988	-0.426559	0.0658214	0.612649	-0.117459	2.31341	2.29896
-0.886047	-2.87785	-0.000861975	0.634473	0.762771	0.944605	0.272336	0.89821	2.5523	0.847272
-1.43746	-0.32124	-0.859498	-0.601458	-0.543006	1.11972	1.46956	1.26824	3.10979	1.69911
-3.21523	-2.55132	-2.20323	-1.02639	0.637746	0.405846	0.817131	0.687797	2.19748	2.72794
-2.76816	-3.06027	-0.0774381	-0.0269408	-0.233122	-0.2692	-0.180569	1.71368	2.89382	0.924706
-1.73931	-1.49968	-0.993755	-0.98489	-0.302334	0.178836	1.23049	0.0158008	0.582253	3.2707
-2.73281	-2.51248	-1.50453	-1.24586	-0.441243	-2.19895	0.569253	2.29486	2.43105	0.0507421
-1.75759	-1.68604	-1.65532	-2.29765	0.637969	-0.693618	0.023927	0.203059	1.97646	2.22569
-3.11137	0.301635	-2.29175	0.373091	-0.812005	0.121054	1.16024	1.88021	3.13394	1.15303
-2.23344	-1.91188	-0.559704	0.261727	-0.917704	1.51941	1.16805	0.665516	3.0034	3.0683
-2.62807	-2.2587	-1.55391	-0.339647	-0.974559	0.178992	0.407823	1.51532	2.04287	1.58233
-2.90429	-0.371761	-0.392146	-1.14781	-0.438802	0.83246	0.553192	-0.409872	3.20702	2.97693
-3.84719	-2.18495	-1.06862	-0.0855247	0.271149	1.70737	1.70481	0.794113	2.45677	1.29047
-1.33889	-3.59721	-2.20997	-1.31123	-0.0823432	-0.486124	1.9211	0.0331479	3.07545	2.69225
-1.53898	-0.683494	-2.19793	-2.58785	-1.9619	-0.0842737	0.495808	0.71549	1.18802	1.13472
-1.70363	-1.99999	-2.1798	-1.68983	-0.992678	0.0803162	1.18143	2.07714	1.28316	0.550316
-2.03421	-2.2815	-2.12793	-2.41092	2.79428	0.374825	-1.87816	2.39763	3.29268	2.08027
-1.41982	-2.86353	-0.903982	-1.74381	2.25992	-0.0425897	1.12558	1.0643	2.43815	4.46667
-1.67319	-2.33853	-1.50853	-1.79757	0.427977	0.874169	0.243551	1.82898	2.1549	1.33369
-2.58162	-3.15638	-2.06913	-1.8938	1.13605	0.530737	1.54207	1.0461	1.52561	3.04632
-1.32547	-2.59065	-0.971574	-3.36307	1.42831	-1.2236	1.46436	2.73915	1.56199	1.44121
-0.92248	-2.02805	-2.89985	-2.6837	0.973571	-0.405184	0.534093	0.268756	1.72227	1.93405
-2.00309	-3.09787	-0.263055	-2.9606	-0.845228	-0.163833	1.25377	1.72562	0.894151	1.31754
-3.00012	-1.453	-0.554074	-0.307875	-0.333366	-0.0610474	-0.0985207	2.14644	2.39489	0.972828
-2.09619	-1.94126	-0.634518	-1.2594	1.7008	0.724726	0.531466	1.74518	2.3906	2.58296
-1.34899	-1.47816	-0.272091	-0.344097	0.0820525	-1.17237	1.23607	-0.68334	1.84866	1.6112
-2.35583	0.894386	-0.202229	-1.33932	0.844243	-0.893964	0.510828	2.12484	1.21842	0.377431
1.13505	-1.55969	-1.2846	-0.572236	1.04357	-0.533774	-0.557621	0.64428	4.93849	2.21289
-3.43919	-2.89361	-0.455298	-3.34033	0.305776	0.221885	3.69508	0.71713	4.20312	1.76115
-1.41826	-2.57661	-1.33984	-1.73652	-0.408718	-0.0459106	0.957966	1.07227	2.00684	3.25338
-2.0817	-3.99675	-1.34527	-2.92007	-0.371451	-0.382079	0.464818	2.17613	1.79832	1.35116
-1.56382	-0.791557	-0.498756	0.541434	0.452393	2.23985	-0.368891	1.40998	2.80921	1.36498
-3.21437	-2.3435	-0.603437	-1.5929	1.07672	1.30209	0.934557	0.943963	1.39072	2.10813
-2.35902	-4.4849	-2.10391	-1.0865	-1.06805	-1.77527	-0.00799021	1.46358	2.58004	3.16135
-2.47565	-2.56916	-0.572267	-0.283645	-0.183977	-0.5398	-0.728764	-0.0471014	3.65553	2.54447
-3.39356	-2.87454	-0.125964	-1.26973	0.181155	-0.376341	0.55864	2.28241	2.53534	2.14345
-1.75315	-1.65861	-0.583168	-1.66877	0.879448	-0.87752	1.68939	1.7559	3.11674	0.642671
-1.67513	-2.57595	-0.877593	-1.40038	-0.654447	0.290739	0.853891	-0.524663	2.19228	2.70096
-2.8249	-1.85461	-0.183798	-2.46982	0.0230396	0.653461	2.16289	0.737219	1.84607	2.254
-2.39314	-0.963583	-0.928068	-0.786899	-1.15519	-0.0421953	1.71174	1.98244	1.776	2.35276
-0.835691	-2.47261	-1.84042	-3.25856	-0.321799	0.269289	0.481015	2.09231	2.83135	0.439065
-3.63349	-1.81664	1.24952	-0.624193	-1.96448	-0.990072	0.744505	0.267511	4.50532	3.57929
-2.6689	-1.1777	-1.81891	-1.42351	-1.0205	-0.386859	1.49781	0.945217	2.92036	1.06044
-1.2999	-3.05061	-1.54107	-1.50987	0.841342	1.54364	0.219047	0.57486	3.04255	2.17717
-0.951769	-0.607723	-0.801715	-0.447012	0.445566	-1.97138	0.556263	1.70201	2.52627	2.03796
-1.61378	-1.38985	1.1266	-1.55354	-0.977457	0.564815	0.316233	1.9044	2.12839	2.40515
-2.52093	-2.85916	-0.460152	-0.376776	-0.375211	0.548555	-0.357303	2.00111	0.748229	2.22863
-0.745113	-1.75889	-2.31196	-1.66513	-0.79298	-0.252193	-0.453644	1.78705	3.51547	0.737581
-2.09168	-2.06893	-1.51935	-1.76234	-0.269614	1.24802	2.694	1.0068	2.13909	0.894358
-1.24724	-2.21565	-1.06117	-0.363958	-1.60535	0.497705	2.0187	2.21432	3.59306	0.910816
-2.49843	-2.30474	-2.98851	-2.45196	0.953406	-0.783963	1.73116	2.53442	1.2615	4.78017
-2.1625	-2.48647	-1.05173	-0.611115	-0.558738	-0.461065	0.329771	1.48988	3.08149	2.56886
-1.91172	-2.4916	-2.68768	0.354838	0.366329	-0.844683	1.43252	1.86152	1.48607	1.11941
-2.45493	-0.0134608	0.319714	-2.2563	0.691258	-0.630916	-0.269121	-1.31336	2.70425	2.55375
-1.99274	-0.292014	-0.271377	-1.19974	0.483079	-0.0702648	0.768748	0.187633	4.13886	3.20598
-3.00476	-1.24518	-1.01355	-0.704171	-0.652931	-2.41633	0.313639	1.53436	2.28698	0.71712
-1.98868	-0.30899	-1.5892	-1.72446	-0.723371	1.48773	1.1324	0.561294	1.18959	3.18171
-2.46519	-0.207677	-0.0237753	-0.0429628	-0.675377	-0.224878	1.36072	1.73538	1.80344	4.1057
-2.58865	-1.99237	-0.510589	-1.50352	-0.227002	-0.167495	1.64835	2.2691	1.51475	3.1074
-3.15609	-2.03455	-1.07085	-0.770639	-0.215386	-0.215973	1.25558	3.47554	3.01464	1.76533
-2.20682	-3.10939	-1.8559	-0.88584	1.11332	-0.0939237	1.65539	1.29893	2.25486	2.85708
-3.846	-1.10359	-1.21544	-2.50639	-0.832906	-0.424404	0.961374	3.3422	0.891899	2.0077
-1.50486	-2.69634	-0.415177	-1.39939	0.534448	-0.357492	2.1074	1.12026	1.89289	2.39267
-2.10679	-2.7252	-2.02343	0.259838	0.788273	-0.892657	0.353198	2.34321	2.00372	0.835455
-2.13807	-1.74996	-2.32175	-0.0171977	0.41772	-0.974362	1.78818	0.159827	3.30109	0.867669
-1.64688	-2.50098	-0.959951	-1.74122	0.263933	1.60439	-1.47913	-0.329418	2.07637	2.24805
-2.2098	-1.48388	-2.41604	-2.74026	0.432667	0.874302	-0.0273614	1.92196	3.08182	1.90449
-2.65933	-2.55556	-0.287782	-1.20857	0.87431	-0.571319	1.50626	2.62993	2.54419	-0.0496975
-1.91815	-1.50524	-1.3029	-4.28033	-0.101869	0.658478	0.710974	1.36674	2.06914	3.74133
-2.42395	-1.20347	1.38082	-0.276902	-0.595504	-1.00788	0.287951	1.95938	3.23003	2.59429
-2.07006	-2.67274	-0.811659	-0.0394081	-1.13932	0.0982403	1.48921	-1.06905	0.277239	0.95861
-1.90558	-3.45669	-2.68156	-2.88159	2.01185	0.832699	0.14674	2.20697	0.208217	2.07009
-3.8359	-1.66097	-1.24543	0.101656	1.66243	-1.07901	3.89717	1.5258	4.41455	2.66644
-3.77632	-2.80195	-1.068	-0.690137	-1.92389	0.368059	2.31894	1.97978	2.19977	2.66132
-1.00133	-1.66831	-1.40211	-0.294576	-1.70833	0.317502	1.23854	1.83906	1.28181	1.43844
-2.84997	-2.01499	-0.661895	-2.24061	-0.743454	-0.435915	1.7096	0.273407	1.90247	2.41921
-3.4339	-3.13919	-0.355196	-1.37048	0.483616	-0.121797	-0.492909	0.117516	1.37503	3.98656
-2.16782	-1.41255	1.75427	-2.38	-0.0685436	0.0550415	0.810394	3.01194	2.5682	2.28066
-2.03373	-2.08429	-1.86283	-1.68121	0.551603	-1.32642	0.276821	1.88268	3.71771	1.41133
-2.65034	-1.92548	-1.30503	-1.32558	-0.848169	0.180023	0.630411	-0.0224153	2.06602	2.28067
-1.20398	-0.896252	-0.444945	1.86946	-1.54308	1.53585	1.09981	2.03947	2.2282	2.72201
-1.65723	-1.87802	-2.18606	0.467617	1.77579	-0.785167	1.85055	0.660552	3.12043	3.40549
-1.64483	-1.47464	-1.06167	0.146982	-0.366737	-1.45374	0.15627	1.41851	1.64135	2.99589
-2.48178	-2.36911	0.261611	-2.21975	0.781656	-0.90405	0.965695	0.121787	2.69772	1.15374
-2.66344	-2.6288	-0.804948	0.305315	-0.428616	-1.62004	-0.0243653	-0.0571528	2.56606	2.52726
-0.11697	-1.21506	-3.0734	-1.19898	-0.173469	0.597623	1.25173	0.288731	3.4904	-0.100781
-2.68474	-1.95768	-1.14228	-1.63038	0.425119	-0.2683	0.12346	1.46137	2.98934	2.88239
-1.69251	-2.08996	-0.680993	-2.09785	-1.17382	0.0514654	0.868686	0.0916459	2.24944	2.27285
-2.96375	-0.553471	-1.2359	-0.0612182	0.690004	0.217578	0.511162	-2.30907	2.40419	0.223512
-3.18842	-1.13166	-1.69093	-1.04943	-0.293977	-0.243793	0.21497	2.28895	0.29038	3.42324
-1.94596	-2.81347	-2.22011	-0.496343	0.151711	-2.38723	2.18873	2.08309	2.58883	1.48244
-2.1615	-3.8505	-1.62047	0.119127	0.887817	-0.0312052	1.17902	2.42384	3.03713	2.09057
-1.72503	-1.27154	-2.03535	-1.67156	0.571395	1.90679	-0.969732	1.66616	3.34788	2.95641
-2.53006	-1.70214	-0.344025	-1.2865	-0.800112	0.199905	0.654929	1.29143	-0.232108	3.68163
-4.49889	-2.5314	-1.79999	-0.429007	-0.797023	1.30969	1.28268	0.912045	1.96705	2.17564
-3.3374	-1.07471	0.378744	-1.21064	-0.80794	-0.788566	1.66699	-1.18332	3.44829	2.7022
-1.80569	-2.04724	-1.72414	-0.547431	-0.324021	-0.161023	1.64227	-0.235435	1.94852	2.7386
-2.18923	-2.24289	-0.896384	-1.41251	-2.1056	1.68582	-0.411233	-0.402726	1.42313	2.56474
-1.21494	-3.04175	-2.24449	-1.13956	-2.0763	-0.599917	3.34637	-0.164307	3.03892	3.24091
-1.06775	-1.30041	-2.44592	-1.73289	0.849867	1.12806	-0.43107	1.50702	2.08019	1.20083
-0.969246	-2.34794	-1.55321	-1.01017	-0.248229	1.64304	0.882401	0.837215	1.48819	2.76785
-0.918514	-0.999214	-2.64302	-0.995335	0.327397	-1.10995	1.31814	-0.0900835	3.16344	-0.720432
-1.5504	-0.87713	-2.05556	-2.96307	0.244655	1.6933	-0.422991	1.82607	3.54005	1.02534
-2.4413	-2.07315	-1.59645	-0.903613	0.719473	0.320106	-0.28341	-0.080011	1.02206	2.20553
-0.6524	0.0173904	-1.30067	-0.452165	1.17035	-0.740986	2.4485	1.64001	3.48495	2.64032
-3.64663	-1.06296	0.466098	-0.193883	0.40748	1.26563	2.48758	0.140274	2.42311	0.064722
-3.25812	-1.78971	-1.77124	-2.65873	-0.687896	0.0123401	0.674137	2.96548	1.87468	2.93178
-2.5879	-1.79431	-1.80938	-0.943014	0.220698	0.623241	1.94735	0.0508197	2.46345	1.76165
-2.29824	-1.60593	-1.47728	-0.632345	1.34184	-1.61924	4.34954	2.13939	1.20672	1.2141
-1.35026	-2.34816	-1.23019	-1.16668	0.774343	-0.0382058	2.2313	0.809899	4.33935	2.79914
-1.33144	-2.28758	-2.49446	-1.47839	-0.217411	-0.510615	0.308652	-0.681691	1.84885	2.95775
-1.31518	-0.822546	-2.57269	-1.92575	-0.628814	0.491291	2.84108	0.63817	0.803509	2.18414
-1.83491	-1.76689	-0.750183	1.00228	1.72108	1.71092	1.4428	0.862452	1.64343	3.84009
-3.80272	-2.77189	-0.476609	-2.11008	0.454365	1.01987	0.305923	1.69793	0.999346	0.773845
-2.62266	-2.15066	-0.794773	-2.49197	-0.528607	0.506011	1.2056	-0.959987	0.893929	3.20966
-3.40002	-3.30107	-1.38582	-0.454736	-1.3562	0.423929	2.44473	2.27898	2.75587	2.89095
-2.07711	-1.79217	-0.610796	-1.10521	1.04451	-1.10222	0.876705	1.60016	2.941	0.475632
-1.0138	-0.567244	-1.19368	-1.80883	-0.643212	-0.275912	0.764623	0.817782	0.336763	3.05442
-1.47174	-2.36773	-1.86546	-3.13772	-0.425139	-1.43833	1.15716	1.33917	2.46059	2.07942
-1.30828	-2.79835	0.0629217	-1.93918	0.404099	0.123114	1.63262	0.254962	1.16773	1.21351
-1.78618	-0.210024	0.351425	0.281983	0.724329	0.753728	0.815473	2.14211	0.472577	1.92098
-0.526426	-2.30239	-0.892419	-0.965697	-0.563856	-0.637564	0.72998	1.69057	2.70267	0.0511119
-1.02964	-2.38792	0.566186	-1.62696	-0.866744	-0.896762	0.793278	0.644194	1.99048	0.88689
-2.61511	-3.60934	-1.95706	-0.9293	-0.243322	-0.858949	1.05586	2.39127	3.00544	1.88032
-1.46311	-1.69406	-0.794538	-1.49522	-1.21431	-0.425131	-0.48151	-0.401102	1.0342	2.27863
-1.01551	-1.19408	-1.07669	0.769034	-0.0890878	-1.31207	1.36066	2.69196	2.52859	2.18801
-2.29952	-1.1369	-1.94304	-3.15214	-1.58866	0.111175	-0.176155	1.97011	2.25149	1.78649
-0.119269	0.301284	-2.62831	-0.369846	1.36306	0.454745	0.509471	0.512822	1.5831	2.53738
-1.22754	-1.71152	-2.52617	-2.47063	2.59167	-2.20153	-0.116579	1.56012	1.62067	0.124461
-1.61134	-1.91661	0.258035	-1.02002	0.0821678	2.63192	0.896813	0.700137	0.639469	1.74124
-2.57557	-0.422709	-1.2512	-0.367694	0.760129	1.13106	0.284593	2.27243	2.90709	2.5667
-1.23749	-1.8535	-0.312888	-1.846	2.26592	1.3077	0.49458	0.534125	2.13589	1.61985
-0.512379	-1.16027	0.0915564	-1.65956	-0.507582	-1.55126	1.04678	0.817818	1.64517	0.182043
-3.25628	-0.763361	1.13683	-1.1426	-1.19261	-0.264466	0.275851	1.10164	0.476204	2.64435
-2.40943	-3.31758	-2.96669	-2.71331	-0.193339	-1.64784	1.86521	1.8322	3.28799	2.8095
-1.71014	-2.3102	-0.162867	0.587121	-0.877749	0.1584	-0.189277	1.21641	1.14684	1.62035
-2.74447	-0.416453	-2.60461	-1.85949	0.834422	-0.907032	1.5148	3.9518	2.02349	1.37767
-1.94028	-2.05222	-0.542135	-1.90921	-0.171907	-0.0964826	1.96983	2.69922	1.54169	2.79711
-2.25137	-2.39298	-1.82662	-0.889276	0.258856	-0.267445	-0.238519	2.5262	2.1715	1.72818
-1.81122	-2.32114	-0.614128	-1.13574	-0.824151	0.977589	1.2318	0.228797	1.7002	2.32212
1.23834	-3.05438	-1.05603	-2.53725	-0.486281	0.0208925	1.80589	1.31595	0.75251	1.33826
-1.88276	-2.47027	0.28773	-0.0999606	-0.8019	0.328054	0.58525	0.856276	2.34236	1.07113
-2.70254	-2.66794	-1.26175	-1.00976	-1.13084	0.323033	2.39446	-0.160346	2.02897	1.19525
-1.97234	-1.06881	-0.203295	-0.661444	0.705157	-1.3695	1.5227	1.49789	3.07097	2.10952
-0.805494	-1.30336	-2.13692	-0.693616	-0.9813	0.128501	1.25169	1.11079	1.34466	1.46958
-2.42368	-0.0782618	-1.73027	1.03581	0.163282	-1.07075	1.13516	1.5868	0.763035	1.88762
-0.222266	-0.236842	-0.971909	-1.19728	0.42711	-0.804501	-0.659698	1.65008	3.06176	2.82886
-2.47145	-1.37857	-2.7215	-1.31611	-1.68588	0.90871	1.44638	3.17688	2.05865	3.06643
-1.28975	-1.41507	-0.563175	-0.801489	-1.42943	0.50805	0.889767	0.671023	1.09973	2.45996
-1.43125	-1.45098	-1.51075	-2.10713	-0.365233	-1.92648	1.46961	1.2799	3.62294	3.48788
-2.30243	-0.792683	-1.59611	-1.62574	-0.862382	0.525248	-0.196093	0.402643	1.02238	1.92417
-0.622333	-1.36372	-0.187099	-2.78076	-0.697356	1.11994	2.63892	0.969586	2.34605	2.58308
-1.9447	-1.59418	-1.04264	-2.51818	-1.11808	0.435844	0.188679	0.357719	1.97298	2.68839
-0.751543	-2.12748	0.20318	-2.38087	-0.879347	0.915091	0.828687	0.596782	2.27708	0.185354
-1.30056	-2.73525	-0.606614	-1.42113	0.0866875	-0.800533	-0.169676	1.03648	1.41003	-0.241578
-1.62078	-3.27466	0.587366	-0.932993	-0.0560963	0.52461	2.02982	2.35428	2.4148	1.70364
-3.13691	0.0884818	-1.3604	-1.47912	-1.12851	1.4995	2.8376	1.92587	2.3347	1.16137
-1.86835	-0.896285	-0.963503	-2.12293	1.20063	0.0121955	2.19441	1.09156	3.75132	2.04448
-4.67684	-2.2377	0.605816	-1.15135	2.34016	-0.0365812	1.09871	2.68558	1.83421	0.530763
-2.17578	-2.55824	-2.46309	-1.90806	0.642928	-0.0515644	3.51758	1.33935	1.44077	2.02993
-1.86034	-2.86635	-2.97404	-0.635814	-0.388893	0.052116	1.61998	2.39401	1.15347	0.698561
-0.744139	-1.34107	-3.09567	-1.23384	-0.270229	-0.498916	2.9076	0.731855	1.57001	1.63101
-3.14436	-1.51535	-2.78789	-1.41254	-0.601061	0.329272	1.56408	2.90165	2.06006	2.09578
-1.68548	-0.389119	-1.24149	-1.17165	-2.01464	0.1512	1.34883	1.09828	2.54357	3.37461
-0.944131	-3.11832	-1.77614	-0.60144	1.20302	0.202087	1.35898	0.494223	2.64316	1.06136
-2.77718	-1.00556	-0.86698	-1.10334	-0.149688	-0.242954	0.978827	0.0958125	1.30645	2.9174
-3.32151	-1.4001	0.38491	-0.496375	-0.389271	0.111351	3.28526	0.633542	2.59532	2.53992
-2.67835	-1.49105	0.963476	0.655055	-0.0258031	0.0300398	1.28196	0.94816	0.716683	2.30803
-1.46174	-1.62547	-0.502522	-2.69418	1.92721	-1.71521	0.427309	0.376172	-0.626509	0.410792
-2.74682	-1.96646	-1.73732	0.786664	-2.41416	1.11297	-0.851031	0.500501	-0.0892397	0.523001
-0.779778	-2.1846	-1.08083	-0.280942	-0.127368	-0.31029	1.62272	1.26819	2.47612	1.7096
-1.55333	-0.351252	-0.97754	-0.967678	-2.11359	-0.582911	1.36358	1.70376	1.64393	2.4739
-0.0904713	-0.445311	-2.78656	0.0628896	1.52579	2.29999	0.482276	-0.900467	0.919284	1.57077
-1.85722	-1.8972	-1.62117	-0.903066	-0.240854	0.250406	1.41401	2.04026	1.60367	1.21903
-2.1766	-2.51207	-0.522658	-0.681079	1.71967	0.214996	0.198645	0.489734	1.61939	1.65044
-2.16395	-3.41097	-1.22796	-2.21038	-0.456266	-0.122002	0.543841	1.73156	3.05717	1.43237
-1.42198	-2.28464	0.173579	-3.92824	0.390205	0.115751	1.24819	0.981794	2.20695	1.64099
-0.868735	-0.949997	-1.47609	-2.31944	0.282118	1.63703	0.623648	1.01154	-1.80596	-0.808404
-0.606984	-2.77681	-1.37129	-0.792054	0.15836	0.408954	0.720152	1.93147	0.596271	2.47597
-2.22668	-2.73021	-0.880083	-1.45984	1.76783	0.0683523	3.1766	1.78882	1.08151	1.78307
-3.5591	-2.6702	0.581245	-1.91525	0.850017	0.256276	-0.0605894	2.24917	0.833088	1.99878
-2.79274	-0.869395	-0.756576	-0.74286	1.14722	-0.881865	0.288527	0.286676	1.07853	2.89803
-4.73914	-1.48969	-1.11769	-1.99457	-0.449069	-1.14184	0.41186	1.30889	2.36233	1.71634
-2.25362	-2.45766	-0.245909	-1.53777	-2.09712	-0.705166	-0.493268	0.117306	4.24966	2.15446
-2.30604	-1.53424	-1.32902	-0.627195	0.918894	-0.368901	0.938526	1.10466	1.73949	2.32806
-2.09798	0.37824	-0.686594	-1.30361	0.52254	-0.778471	1.23703	0.830614	3.05025	2.10113
-1.80315	-2.47084	0.0491378	-1.11633	-0.881379	1.58701	0.404603	1.61412	4.49182	0.255594
-2.52968	-2.21618	-2.37994	1.29377	-0.662557	0.377384	1.27525	-0.674266	0.937118	2.47974
-0.409443	-1.45689	-1.65524	-0.37625	1.60031	0.167979	1.41241	0.263288	2.01859	-0.200959
-0.622963	-3.26421	-0.578408	1.84357	-0.113225	0.784262	3.24808	0.701225	3.70601	0.371053
-2.48714	-1.93037	-1.94287	-0.304574	0.394872	-0.923555	0.580807	1.71395	1.74936	1.07643
-2.20051	-1.29703	0.449014	-1.38136	1.27804	-1.06962	2.62005	1.4758	3.41955	1.79592
-0.948499	-2.36612	-2.77094	-2.90289	-1.60364	1.35197	0.624304	0.735207	3.1879	2.77164
-4.87205	-2.92282	-0.461408	0.383223	1.66448	-0.171361	0.695826	1.38584	0.816091	2.47252
-3.20051	-1.41748	-2.64076	0.582171	0.847013	-1.44229	0.049414	0.738208	1.10476	2.56223
0.04347	-1.65693	-1.31349	0.0681775	-0.648912	-1.39667	1.68176	1.01224	2.01928	3.27257
-0.180227	-1.66198	-1.3987	0.195238	-0.368594	-0.605233	1.1561	2.78596	2.9787	1.89836
-0.877025	-1.67589	-2.82602	-2.00822	0.494886	-0.201056	-0.363461	0.5532	4.0553	-1.44252
-1.24463	-2.92699	-1.16631	-2.31848	0.938951	1.15145	-0.628576	1.78707	1.48074	0.774361
-2.31009	-0.491888	-0.676637	-0.16756	0.306371	-0.383378	2.61561	1.29182	1.71241	0.959574
-1.07029	-3.35519	0.664304	-1.20307	1.18304	-0.800466	2.37844	1.32411	2.10968	2.49032
-0.924884	-0.768331	-0.590021	-1.4603	0.125002	-0.848227	0.376653	-0.249113	3.79996	1.42566
-2.2756	-1.66596	-1.73932	-0.938342	1.16306	1.92663	-0.923656	0.492955	1.1656	0.846726
-2.57406	-1.6916	-1.80276	-0.356297	-1.4348	-1.77222	2.58003	1.23811	1.54293	2.8061
-1.84288	-2.3853	-1.73279	-1.8763	0.628852	-1.31823	2.3584	3.66403	-0.527132	1.69444
-2.04053	-2.54254	-2.27637	-1.85636	0.453006	0.177636	2.47455	1.72959	2.45845	1.97106
-1.31103	-2.64423	-2.53748	-2.08563	-1.46037	0.983506	1.17949	-0.641292	1.84117	2.56522
-1.64596	-1.71919	-0.970265	-1.64126	1.20457	0.617162	1.0795	-1.06693	1.50023	0.312516
-2.78815	-2.39881	-1.2213	-2.52442	0.0914301	0.96349	1.11029	1.02038	1.79719	0.606607
-1.68749	-0.625575	-0.662601	-0.858419	-1.01863	-0.0314286	2.17474	0.147109	3.42136	2.84302
-2.6405	-2.12385	-0.957664	-0.167928	-0.385917	0.331123	2.19211	2.40175	3.02064	2.87659
-2.18625	-3.75341	-1.73919	-0.161208	0.601735	-0.0291284	0.714324	0.137071	1.16647	2.46172
-2.14789	-1.24808	-0.754504	0.0723638	-1.27849	1.45553	2.51201	-0.147951	1.7077	1.84622
-1.21868	-2.48003	-2.23574	-0.976555	-0.55711	0.098249	0.42231	0.943844	3.46341	1.37191
-1.46429	-2.24885	-0.708391	-1.56773	0.775042	-0.580215	1.60705	2.35843	1.5834	3.75247
-1.64247	-1.06403	-1.9002	-0.287979	0.0371735	-0.352587	0.428568	2.32483	2.2809	2.68281
-2.66375	-1.52026	-1.8795	-3.09184	0.511314	-1.25097	1.92376	1.33294	2.44654	1.6838
-3.63984	-1.02466	0.180734	-1.28338	1.69895	-0.799307	1.46408	0.47751	1.93371	1.80822
-3.5458	-2.06373	-0.544506	-0.477379	-1.05166	3.65977	0.563997	0.69261	0.161424	1.76056
-2.18964	-1.13833	-0.590906	-2.27532	0.239433	-1.07824	-0.78196	-0.200198	0.886882	0.886049
-0.210815	-2.18802	-0.58778	-2.56863	0.945764	0.202057	1.8082	0.652293	1.74952	2.29609
-1.99141	-3.05865	-1.73027	1.83915	-0.240474	-0.3462	0.731969	-0.43251	1.9757	2.6951
-1.43483	-1.00202	-1.31773	-0.743962	0.316584	-0.0213445	0.566021	0.895018	1.17898	1.91861
-0.823429	-2.99608	-0.529773	-0.153526	-0.290697	-0.774062	2.02108	2.23151	0.642492	2.06192
-2.87349	-1.09538	-0.452827	0.0652075	1.21851	1.77463	0.169059	3.15017	1.61207	1.29798
-1.06083	-4.04999	-1.21434	-2.64266	-0.635415	0.249297	0.3864	1.9648	1.74834	2.43966
-2.81656	-4.19489	-1.42967	-0.950444	0.747613	-0.224187	1.99005	-0.16248	2.6207	0.511521
-2.19118	-1.85831	-1.41795	-1.2945	0.949814	-1.12206	-0.564616	2.52418	2.10391	1.75133
-1.65087	-1.54793	-0.842245	-1.12737	-0.0398387	-0.281918	1.79759	1.14218	2.60734	1.08636
-1.34274	-2.10073	-2.25616	-1.71529	0.557257	1.26177	0.385976	0.764113	2.12178	1.9393
-3.51188	-1.78623	-0.195698	-1.00934	0.0350929	-1.48412	0.919006	1.42304	1.67755	2.02263
-1.24883	-3.41246	-0.940619	-0.794998	-0.028354	0.564033	1.32125	1.54514	1.89426	2.7975
-2.96778	-0.798791	-1.61318	-1.22541	-1.04209	-0.0644304	-0.291053	1.27453	2.15647	2.65962
-0.369848	-2.46506	-0.872785	-1.04508	0.572792	1.56151	1.2529	2.45311	2.1958	1.74771
-3.30431	-2.59836	-3.09998	-0.229017	-0.87951	-0.392997	-0.947316	1.98948	0.729355	1.17873
-2.82896	-2.45723	-0.336445	-0.034683	0.0178228	0.47025	1.4061	2.37841	1.98995	1.77076
-1.17724	-3.92209	0.763734	-1.32608	0.436165	0.432538	-0.993805	0.601352	1.45916	2.14432
-4.04355	-0.0570461	-0.088537	-2.23419	-0.34733	0.692271	1.20319	1.6561	3.25725	1.27625
-2.80444	-0.816342	-2.55222	-0.922613	-1.28431	-0.0878844	0.525255	1.8397	0.867329	3.1977
-3.84525	-1.1414	-1.7185	-2.88812	-0.0795745	-0.216838	1.64475	0.623014	3.45229	0.601182
-3.41394	-2.98735	-1.19061	1.21756	-1.61449	1.57602	-0.327311	1.28978	1.36745	0.837185
-3.39666	-1.45527	-0.973999	-2.60782	0.796122	-0.655198	1.28552	1.44611	2.09987	1.78175
-3.04119	-2.99842	-0.518168	-2.58047	1.13594	-2.03349	0.548666	0.305198	2.90345	-0.244865
-1.32635	-0.432105	-1.95101	-0.371848	0.995799	-1.48803	0.183884	1.60121	1.02976	2.14941
-1.57068	-1.73896	-1.36925	-1.07407	1.0382	1.20959	1.78887	-0.353146	3.198	2.92324
-1.22015	-0.332222	-0.193318	-1.05304	-0.205969	0.89569	2.33624	2.58445	-0.93014	1.95597
-2.24832	-2.97785	-1.53592	-1.56157	1.40389	1.6284	1.05177	0.76661	3.17509	2.71616
-0.156905	-0.585099	-0.906107	-0.612278	1.14805	0.0924139	2.199	0.670046	3.07493	2.78539
-3.21413	-1.18674	-0.13438	-0.777344	0.206385	-1.99673	2.99107	-0.447213	4.02045	1.2703
-1.59248	-2.07101	-1.06696	-1.39583	1.35389	1.31569	-1.27818	2.92429	2.65897	0.64335
-3.15237	-3.41083	-1.95116	1.73193	1.11309	1.69511	2.37058	-0.631509	0.46463	1.0252
-2.54756	-2.07204	-0.687988	-3.5196	-0.256437	-2.18152	0.519654	1.17518	1.43336	2.68559
-0.358951	-3.39892	-1.86844	-0.141413	-0.128236	-0.69695	0.182057	-0.403263	1.33719	2.8016
-0.981777	-1.78709	-1.58733	0.00781444	0.353698	0.825767	2.814	2.22562	-1.63208	1.26415
-1.18407	0.0225758	0.282023	-0.149885	-1.04169	-1.79158	0.802875	0.577637	1.52854	3.76768
-2.44357	-1.86209	0.142629	-3.43771	0.363833	0.0493873	1.51022	0.0641798	4.21776	4.45836
-3.6817	-2.66984	0.221468	-1.45135	1.20472	-0.531986	1.07038	0.692365	1.74526	2.05804
-0.43828	0.0246659	-0.972306	-0.162488	-0.639885	0.610354	3.25994	-0.551334	1.2829	4.08896
-1.83282	-2.0522	-0.268821	-1.36521	-0.230613	-0.130239	-0.921102	-1.15314	0.484223	1.40407
-1.53917	-1.70297	-2.09573	-0.278081	0.467736	-0.608319	-0.684096	2.26615	1.77777	3.00119
0.252553	-3.01041	-2.01039	-0.698153	-0.322718	-1.07964	1.92774	2.49831	1.32748	2.45838
-3.68495	-2.74499	-2.56215	-2.5716	0.579822	-1.06191	2.46567	1.44037	1.63986	0.973085
-3.37776	-1.88644	-1.37368	-0.716328	-0.569506	-1.01142	-0.0160432	0.614644	1.43417	2.94506
-1.94366	-3.49327	-0.531825	-1.50012	0.547864	0.430875	0.0137272	0.794585	3.78116	1.91879
-2.03294	-2.29378	-0.923593	0.650168	-0.219933	-0.473887	1.61229	1.61708	1.87055	2.32855
-1.76013	-2.64094	-1.06876	-2.32128	0.567294	-0.579055	0.632258	0.595792	1.42071	1.64061
-2.40051	-2.28788	-0.825694	0.189508	0.707008	-0.517119	-1.50182	0.498211	2.54188	2.47016
-0.671088	-3.13506	0.0557548	-2.0244	-0.729196	0.869245	0.255894	0.216029	1.3136	0.59662
-2.58249	-1.93516	-1.4628	0.180594	0.33365	-0.304593	1.84839	0.507555	2.1614	3.74498
-2.07262	-0.843671	-1.63347	0.428014	-0.643851	0.135048	0.125656	-0.536002	1.17901	2.80801
-2.30333	-1.65352	-1.60627	-1.18633	-1.93295	0.571369	1.09353	2.33649	3.00224	1.77365
-1.96724	-2.85388	-2.11583	-1.61869	-2.09654	0.489538	-0.507202	1.08768	3.46563	1.25154
-2.30739	-2.02874	-0.74384	-2.19729	0.257531	1.4028	0.895069	1.61961	1.40904	2.5577
-2.79904	0.596254	-2.00452	-2.54587	-0.855664	0.580607	-0.231033	0.28447	1.29554	2.33941
-1.77655	-0.954433	-0.595734	-1.81663	0.504323	-0.230969	2.11346	1.24588	1.93753	2.51307
-0.33423	0.0043766	-0.683261	-2.29276	-1.22233	-1.05523	0.167492	0.794855	3.31929	2.58135
-3.8031	-2.64101	-1.73375	-1.00479	-1.70903	-1.159	-1.26888	2.2639	1.41113	1.05683
-3.40127	-2.49064	-0.503063	0.269116	0.0253248	-1.14343	0.788713	0.887589	0.884648	2.18419
-2.35656	-3.47179	-1.37579	-2.06204	-0.928874	-0.810371	1.26924	1.20138	2.63366	2.35566
-0.889662	-0.725242	2.02622	-0.312168	1.40242	-0.274613	-0.90661	0.24643	2.12883	4.15648
-2.70722	-1.31949	-1.98954	-1.12327	0.345919	0.521666	0.729929	1.68934	1.96442	1.23029
-1.14595	-1.33844	-0.691006	-3.00876	0.00793708	1.35722	0.772726	0.860503	1.42404	2.96953
-3.3581	0.445378	-0.95016	-2.19234	2.45488	-2.80534	0.667099	0.671531	1.56702	1.96733
0.0872137	-2.48924	-1.21831	-0.492153	0.892456	0.0507892	1.13165	0.473913	1.70685	2.39972
-2.46318	-3.33077	-0.555853	-2.16537	0.535066	-0.684675	0.602468	-0.320036	2.62087	2.42126
-1.38516	-2.00319	-1.15014	-0.199629	1.63305	-0.343021	2.87869	0.95102	2.41473	1.80699
-1.51799	-2.4211	-0.548353	0.448877	0.42417	-0.713901	0.65877	1.3965	4.37469	2.27889
-3.26235	-2.96092	-3.77965	-0.195414	-0.338686	0.478022	-0.295961	3.88807	3.63459	1.63333
-2.61727	-1.85077	-2.04291	-1.04434	-0.0372214	0.112522	0.666353	0.282422	3.70309	2.14083
-2.22756	-1.22107	1.2145	-0.286396	-1.3076	0.927644	0.610026	0.99539	1.58464	0.85133
-1.32184	-1.06598	-1.06998	-2.81052	-0.405825	-0.647933	0.614205	1.88849	2.11268	1.42153
-1.70339	-0.144029	-0.199238	-0.326561	1.17951	0.847915	2.16227	1.56193	2.20481	1.23168
0.143986	-2.49139	-0.355022	-0.573319	0.550649	0.543407	0.0627456	0.348633	3.2376	2.59446
-3.05761	-1.23305	-0.370688	-1.61086	-0.36689	-0.277189	1.53383	-0.066324	3.42795	2.10941
-1.41266	-1.19747	-0.720448	-2.62011	0.729419	1.72904	0.26035	3.33181	0.639608	2.40477
-2.49776	-3.0243	-1.44307	-0.493585	0.430215	-0.127139	-0.99115	-0.330458	2.00793	2.20477
-2.15665	-0.263443	0.0529883	-0.4707	-1.29534	0.212872	1.27848	1.4479	1.56131	1.04417
-2.20219	-1.30392	-1.43197	-0.765715	1.18634	0.963083	0.3935	-0.115309	3.78514	2.63233
-2.5629	-2.87975	-1.26305	-1.69139	0.037658	-0.0835645	-1.13624	0.484427	0.871783	0.508622
-2.80052	-4.25158	-1.47689	0.370587	1.16265	-1.40822	-0.0534859	1.36556	1.91708	0.918731
-2.65548	-1.11656	-0.0949151	-1.09152	-1.21348	-1.14683	-0.0274529	1.27402	1.7686	2.6442
-1.95668	-2.84601	-0.227825	-0.370119	-1.0259	-0.497215	0.480413	1.33694	1.96025	2.40159
-2.05359	-1.74019	0.528415	-0.758166	0.665756	0.185425	2.2696	0.54947	1.37978	1.07336
-1.16767	-2.73133	-2.22544	-0.820471	0.509599	-0.120992	0.682808	1.65716	1.17014	2.20275
-2.00759	-1.66711	-0.0295054	-0.876842	-0.276622	-0.608932	-0.535544	1.96267	1.07223	1.15191
-0.946524	-3.25068	-1.9886	-1.41275	0.488498	-0.393393	-0.121489	1.41818	2.7233	1.44654
-2.30581	-3.79884	-2.54277	-1.18152	-0.0602257	-2.17249	0.872434	2.0689	1.90247	2.18519
-2.83965	-1.66287	-1.3318	-1.60704	-0.720601	0.268343	-0.589053	1.64752	0.323308	1.66263
-0.290792	-2.23819	0.637667	-1.7367	1.63074	0.455017	1.17657	1.2965	3.46429	1.4977
-2.40159	-2.99946	-0.656971	-1.19802	1.08097	-0.00664028	0.429713	-0.266458	1.40646	1.33236
-3.36679	-2.86172	-0.976659	-0.712077	-0.733154	0.628682	0.698493	0.667382	3.08408	-0.13917
-1.37928	-4.09587	-0.266497	-0.359346	-0.892699	-1.29797	2.60555	0.912294	1.22552	3.06792
-2.20606	-2.68316	-0.633033	0.774123	-0.257911	-0.0387919	-1.76595	0.770758	2.74332	1.09616
-3.04551	-1.76212	0.218664	-0.184851	-1.41064	-0.599383	1.41355	0.908593	1.95429	1.22865
-2.79227	-3.0876	-1.69643	-1.44346	0.0405793	-0.007721	-0.155381	1.2288	2.82286	2.44523
-2.58358	-3.54449	-0.214587	-0.83849	0.249801	-1.87481	0.689743	0.645724	3.0709	3.84238
-3.64462	-2.79666	-1.47734	-1.14384	0.395088	-1.34565	1.75323	1.79604	-0.204673	1.20135
-3.14517	-1.10888	0.103087	-0.592762	0.145737	-0.919787	0.596563	1.57757	2.13869	0.154577
-2.08191	-3.16406	-0.723177	-0.295785	-0.752092	-0.773829	1.7197	0.235917	1.37494	1.00628
-2.10603	-1.29887	-2.23998	-1.86282	1.2068	1.21715	1.28904	-0.468631	2.92008	1.4905
-1.4236	-0.285345	-0.523854	-0.281787	-0.0593828	-1.50212	1.5045	1.88681	4.41478	3.15042
-2.80265	-0.717068	0.0600381	-0.852508	-1.80744	-0.915535	1.6264	-0.0787003	1.65288	1.63828
-2.3691	-1.92366	-2.39712	-1.94019	-0.791059	0.277741	0.478659	-0.0712977	2.1422	3.35463
-2.85845	-3.03817	-0.391486	-0.12218	-1.21774	1.66201	1.88146	1.17369	1.25444	0.723777
-0.183222	-0.108713	-0.417524	-1.17211	0.714224	-0.746378	1.44632	1.36315	2.25267	3.02996
-1.70413	-1.16564	-1.95724	-0.64073	0.823085	-0.311073	1.41518	0.785945	1.12308	-0.0716821
-1.78522	-0.41802	0.0444792	-2.28857	0.993385	0.467554	1.21552	-0.594292	2.28119	2.6912
-3.78079	-0.369848	-1.9075	-0.0226305	-2.27367	1.00252	0.69221	1.87043	2.50042	2.75155
-3.68012	-0.400949	-0.567537	-2.2115	0.211981	0.146612	2.37506	0.926772	1.42576	2.38157
0.139918	-3.25312	0.653378	-2.04628	-0.749916	0.366581	1.39055	1.99777	0.182902	1.81163
-2.70883	-2.01231	-1.6209	-2.69009	0.846075	1.42065	2.47479	0.199882	2.55022	1.62133
-1.16535	-4.16918	-0.103108	-0.0917282	-2.0316	-0.663445	0.992019	1.16808	1.21945	1.47814
-2.15704	-1.33379	-0.682593	-1.33696	-0.671908	-0.0076581	2.20918	0.55501	-0.110838	0.941366
-1.21435	-1.34981	-3.13005	-0.818534	-0.55243	0.899989	1.71989	1.13292	2.29226	2.53811
-2.45252	-2.41096	-0.705593	-0.168095	-0.140172	0.448253	1.08575	1.75572	2.5161	3.13475
-2.56394	0.529128	-1.93129	-1.85238	0.0986315	0.687494	2.5744	1.40554	1.87285	1.83933
-3.03072	-1.75743	-0.584682	-1.00463	0.0272382	0.7127	1.51003	-0.317522	1.82232	1.06307
-2.31701	-2.16374	-2.97584	-1.11036	-0.381526	-0.187444	0.100361	2.34087	1.30765	3.1343
-1.67893	-2.58168	-1.95436	-0.608265	1.83269	0.836469	2.18818	0.296389	2.71833	1.83666
-1.96241	-2.44901	-0.395639	-0.690182	-0.210568	1.00037	0.695656	0.745522	0.303447	2.65019
-1.26671	-2.40065	0.288283	-0.996814	0.873767	1.32149	0.401059	1.92513	4.27751	2.50793
-1.9424	-1.99479	-0.242942	-1.49878	-0.230559	-0.963998	1.11759	0.107114	2.42458	0.765286
-0.115035	-0.146055	-0.614586	0.318732	-0.759102	-0.754447	1.01002	0.63959	2.6471	3.80189
-3.1994	-2.79852	-0.380984	0.274517	0.636197	-0.637436	0.653537	0.326469	2.16765	1.83119
-3.46112	-2.38897	0.548457	-1.83831	0.616696	-1.35054	1.89488	3.35075	1.97476	1.96337
-2.12775	-2.73146	-0.641207	-0.617896	1.79834	-1.91468	0.671724	-1.12066	0.215948	1.87062
-1.68813	-2.55014	-1.79641	-1.20842	-0.47059	-0.451213	0.794752	0.200175	3.07086	1.73042
-2.09096	-3.90272	-1.53797	-1.32145	-1.46394	-1.90366	1.4928	0.342517	1.12498	2.95201
-1.39997	-3.01014	0.597492	0.34774	0.474809	0.586061	2.40531	-1.93402	-0.453866	3.04914
-2.48908	-1.4213	-0.481815	-1.41565	0.422806	-1.38925	4.00729	-0.380123	2.09433	0.860441
-3.46832	-1.00937	0.23183	-0.345473	-0.279697	-0.212056	0.43447	-0.625423	1.4683	2.04502
-1.76777	-1.77865	-2.10857	-0.564685	-0.575095	-1.21942	2.55198	2.65706	2.80755	0.377513
-3.44027	-3.37175	-1.1381	-2.35375	-0.613088	0.176237	1.38635	1.94358	1.52543	2.77951
-1.96553	-2.33548	-0.38185	-0.710365	-0.558219	0.850121	1.95718	-0.429969	1.47262	1.68418
-2.61604	-2.15912	-0.899895	-0.633968	0.186986	0.712615	-0.967233	0.635956	2.02281	2.35323
-2.93067	-2.18345	-0.73583	-0.800964	-0.777123	-0.134368	1.71303	0.474318	1.38769	0.932153
-1.49798	-2.92764	-1.98238	0.973147	-0.391413	-0.625693	0.663902	1.25103	2.76266	0.766287
-2.87838	-2.15853	-0.329464	0.139426	0.472391	0.0436531	1.34098	-1.46783	0.584375	2.57842
-2.50146	-2.11895	-1.83521	0.127319	0.59475	0.0183808	2.14933	0.0221019	0.893146	1.90127
-1.97623	-3.76722	-0.513866	-1.86628	0.356984	-0.365383	2.72334	2.13348	2.75717	1.18041
-0.45857	-2.24398	-3.37201	-1.50623	0.356136	-0.757295	1.09616	2.44856	2.80025	2.27579
-1.96329	-3.24188	-2.08427	-0.562745	-1.14348	-0.983951	0.846533	1.50911	3.58659	0.783496
-2.30065	-2.34696	0.960917	-1.1979	0.696678	-0.593086	0.04363	1.85323	2.58027	1.56295
-3.08535	-2.27614	-1.53645	-0.871476	-1.36091	-1.4483	-1.45302	0.509217	2.8012	1.81418
-3.59731	0.223821	-1.68754	-1.54435	-1.94442	1.83228	1.28197	-0.394721	1.53346	0.444363
-1.83299	-1.56568	-0.689946	-2.35403	0.110776	0.307544	2.85537	1.02489	1.53647	2.96075
-1.76936	-2.85458	-0.088832	0.43181	-0.536504	-1.62346	-1.11301	2.38943	3.60099	2.28919
-1.9785	-4.71039	-0.873514	0.433353	0.0310878	0.486273	1.74259	1.06261	2.29772	1.45342
-3.0668	-1.47113	-0.533314	-1.92549	0.50041	-0.158163	0.189383	2.6376	3.69334	2.29026
-2.31056	-4.2234	-1.20067	-2.16056	1.46503	-0.88118	1.43824	0.940099	1.25564	2.77961
-3.49683	-1.19881	-3.64062	0.277095	0.0725644	0.23653	1.21438	0.179113	1.67563	3.68421
-3.80465	-1.9774	-0.602101	1.17638	1.5783	0.606927	2.39324	1.1348	1.60772	1.75438
-3.86986	-1.14173	-0.385289	-1.18385	-0.803298	0.191857	1.51183	0.980221	2.83894	1.80961
-1.51286	-1.11131	-1.23028	-0.891105	-0.227546	1.56592	4.11236	1.38695	2.11157	1.28817
-2.37659	-1.65568	-0.691138	0.391591	-0.56146	-1.40874	1.51184	1.04181	1.7465	1.22243
-1.81939	-3.3348	-3.27811	-1.10298	0.548132	0.310289	0.722449	0.0270667	1.39188	2.08559
-1.93832	-2.71082	-2.76306	-1.04489	0.914393	0.663938	0.16217	0.558983	1.35814	0.917094
-3.25121	-3.16894	-0.893813	-2.39073	1.0441	-1.31134	0.758093	-0.729368	2.39602	1.72269
-0.905268	-1.18983	-1.22624	-1.84606	-2.0122	-1.78703	1.28396	0.343812	1.62099	1.05076
-2.38705	-4.07285	-1.54042	0.925563	1.30629	2.20754	1.7073	1.26603	0.965094	2.53695
-1.4313	-0.853169	1.27735	-0.580513	-0.636676	-1.07077	-0.456317	1.21575	1.48225	3.0617
-1.37961	-2.26406	-1.95033	-0.803943	0.970442	-0.108394	1.28208	1.74591	1.51338	1.63263
-3.43221	-2.10011	1.022	-0.194255	1.24816	-0.534607	1.25035	1.42897	0.944415	0.272456
-2.91196	-2.80469	0.139718	-2.06931	-0.254187	1.50959	2.02826	0.609124	3.3205	3.28514
-2.09202	-2.65056	-1.93407	-0.819898	0.142833	-0.146789	0.401503	-0.0747397	3.16001	1.72799
-1.94181	-1.08593	0.0934975	-0.728017	-0.436558	0.582101	2.155	1.45771	1.43072	2.82436
-3.51724	-1.74737	-0.715224	-1.46042	0.0355454	0.603825	0.440189	1.41375	0.795709	2.26751
-1.60213	-2.30355	-1.18049	-0.108003	0.650777	-0.291208	1.42721	0.509753	1.75641	1.1477
-4.05564	-2.89092	-1.67023	-1.08296	-0.775215	0.680859	2.0246	-0.052247	1.81719	2.70027
0.266333	-1.29079	-1.58497	-0.0847377	0.56733	-0.370754	0.173394	0.375919	2.32115	1.33833
-3.21211	-2.39875	-1.60965	-2.58425	-0.615233	-0.21628	1.99463	0.500755	2.38651	1.52162
-2.45077	-1.91764	-1.10357	-1.37859	0.408768	0.541691	1.77023	1.27144	1.20688	1.94569
-1.71183	-1.21382	-0.722614	-2.1663	-1.9185	-2.62947	-0.887499	0.45315	1.20138	3.10684
-1.88711	-2.89095	-0.932096	-1.05377	0.28704	-2.43424	0.666183	1.09689	-0.323735	3.1401
-1.11662	-2.78777	-1.33357	-0.550095	-0.41945	0.95971	1.48988	2.27667	0.642132	4.2628
-1.4651	-0.198383	-0.917799	-0.344983	0.0672084	-1.63576	-0.892392	2.83712	1.12398	1.59461
-1.87716	-3.68267	-0.527627	0.858489	-1.202	1.9147	0.57368	-0.364097	2.35462	2.42319
-1.3934	-1.61828	-2.36048	-0.251726	2.01146	1.40053	-0.302321	-0.0908782	0.99428	2.01263
-3.07267	-1.38654	-0.881702	-0.666175	-0.91951	-0.529593	2.3697	0.52204	1.50062	2.15258
-1.95577	-3.09095	-0.198003	-1.27169	0.253085	0.210327	0.864862	2.05469	1.66948	2.3542
-1.83965	-2.182	-1.21165	0.479904	-1.32375	-0.723739	-0.576909	1.45215	2.44351	0.101321
-3.85139	-1.79012	0.132407	-0.694422	-0.189624	1.25576	3.29009	0.651693	1.0047	3.52609
-3.60674	-1.5427	-0.887994	-0.407471	-0.251011	0.178493	2.5582	0.0958848	2.2965	3.11814
-3.44848	-1.54325	-0.215599	-1.82024	-0.849733	-0.414022	1.06351	1.53431	2.48812	3.3648
-1.90038	-3.51234	-1.4094	-2.58125	-0.149516	1.19727	1.65894	-0.412507	2.47854	2.93125
-1.55601	-0.971332	-1.45524	-0.295176	1.98225	1.07828	1.94073	0.261606	0.612462	1.19958
-3.58662	-2.96462	-1.58235	-1.64342	0.314624	-1.14641	0.357531	0.753164	1.6978	2.69557
-3.16363	-2.40144	-0.462921	0.699449	0.422053	-1.24466	1.12877	0.587981	2.11153	2.69192
-0.64398	-2.09616	-0.207779	-1.43467	-0.469266	-1.64772	1.65914	1.38988	1.52642	0.827327
-0.704749	-2.29662	-2.26142	1.80618	-0.640958	-1.47068	0.392261	0.84098	2.27905	3.49489
-0.831712	-2.71606	-1.6101	-0.955999	0.23894	1.40898	3.31778	1.22531	1.88007	2.20101
-2.50138	-3.75341	-0.168913	-1.62713	-0.00926822	-1.33259	1.27794	0.355855	1.38999	2.04473
-1.29987	-2.27004	0.294687	-0.331491	-0.0903516	-0.139095	0.0737565	2.55981	1.96616	3.19679
-2.57919	-3.14049	-0.626517	-0.211857	0.0914056	-0.571729	1.16292	0.942458	2.25603	1.45602
-1.49898	-1.77423	-1.26532	-0.26635	-0.602515	-0.0179744	1.083	1.0173	1.4007	1.67781
-3.08909	-0.719942	-1.67473	-0.555661	0.744547	0.322586	0.327433	2.41737	2.97869	3.95984
-2.09882	-2.27015	0.367464	-2.61123	0.917301	-0.883396	0.803452	1.06306	3.1783	2.02636
-0.254932	-2.18056	-1.19616	-0.540411	-3.05086	-0.401481	-0.0555102	0.413353	1.53833	2.28246
-2.20238	-2.39256	-1.82366	-2.57074	0.403053	-0.0235574	1.21656	0.358398	3.08702	2.12312
0.146402	0.136405	1.32462	1.28483	0.510995	-0.530702	2.6752	-0.610367	2.41989	0.0792846
-1.02577	-2.18979	-2.36191	-1.91382	0.0544638	-0.580937	0.658542	0.172444	1.42796	2.79117
-2.66285	-1.58603	-0.681384	-0.81365	0.168992	0.240991	-0.156325	-0.471214	0.285325	3.33472
-1.96808	-3.59366	-1.88747	-2.32129	-0.332958	0.54947	3.7248	-0.248281	2.74646	1.62611
-0.856186	-2.50954	-0.715715	-1.67909	0.0890344	-1.20663	0.416511	1.4758	1.46635	1.68237
-1.35121	-2.11863	0.766454	-0.0366038	0.262501	0.448126	1.34688	0.0390248	1.7742	1.8377
-2.07282	-3.34343	0.149415	0.954343	-0.132517	3.14736	2.05684	2.49329	1.06635	2.81873
-2.88005	-2.65366	-0.0122506	0.304538	1.47697	1.40412	2.01739	0.432113	3.28682	1.65517
-2.02201	-1.6617	-1.89886	-0.751164	-0.745268	0.94254	2.19854	1.98448	3.0221	0.829687
-2.28876	-2.76209	-2.95604	-1.24087	1.04979	-0.545292	2.71692	1.36974	1.78806	3.30212
-0.946834	-2.00919	-0.373208	-1.05254	-0.478068	0.297435	0.82974	1.95126	0.478533	1.07973
-1.52424	-1.62606	-1.99219	0.174419	-1.2627	0.425535	0.435647	0.352182	1.5102	3.34623
-2.87926	-2.63885	-0.783582	-3.24437	-1.0112	-1.79416	1.37987	0.703154	2.71863	1.98124
-1.14441	-0.0442464	-1.50751	-1.0892	-0.833086	-1.0561	0.236229	-0.109925	-0.439476	1.05662
-1.52671	-2.67508	-1.78282	-2.80335	0.124647	-1.04563	2.04479	2.50755	0.795406	-0.593256
-0.771495	-3.64202	-0.867303	-0.571178	-1.92144	-1.76083	3.57536	1.82978	2.29438	3.22471
-2.84033	-0.728952	0.655174	-0.394096	0.787158	-1.44134	1.80815	1.3489	1.86068	3.10717
-2.42631	-0.486178	-0.848887	-1.64853	-1.32168	1.77702	2.34277	1.94398	0.646635	3.25062
-3.71669	-2.65708	-1.82994	-2.20075	0.380493	0.196873	1.0311	-0.246236	2.25505	1.40186
-1.66597	-1.80694	0.539222	-0.0227978	0.573307	-0.455397	-0.465882	1.82913	1.89463	2.36549
-1.72192	-2.03249	-1.33258	-1.6736	0.0976832	-0.0770709	0.462004	2.81878	1.6971	0.741224
-2.62663	-1.0058	-0.48957	-1.41716	0.834673	-0.405449	0.0688747	1.07148	2.27938	2.11051
-2.66386	-3.25603	-1.02139	-0.563352	-0.517388	0.183888	0.253458	1.29553	0.562835	1.22707
-2.11065	-4.57159	-2.52829	-3.36913	-0.0538362	-1.73499	1.85373	0.968386	2.28467	2.37789
-1.169	-1.50887	0.468465	0.418974	1.77395	-0.647707	1.15637	0.87006	2.66381	1.61956
-2.07335	-2.68921	-1.37272	-0.620237	0.643455	-1.23771	3.74993	-0.486613	2.06191	1.82618
-3.80831	-3.72443	-1.42373	0.878165	0.917236	-0.703915	1.80085	1.0963	2.20146	1.36715
-1.32032	-1.90159	-1.01926	-1.37774	1.34801	-0.331308	0.523256	0.62524	1.81031	0.940804
-1.62164	-2.143	-1.42836	-0.479563	-1.58645	0.838737	-0.0925295	1.27747	3.1696	2.42959
-1.6962	-3.5949	0.612477	0.132788	-2.27627	0.613894	-0.343817	0.389411	1.4841	1.29774
-1.35634	-1.63912	-2.18365	-0.786011	1.59804	0.162077	2.19692	1.95555	0.256821	1.6521
-1.10868	-1.88756	-0.719042	-2.6471	-0.516016	-1.08739	0.945283	1.23687	1.89518	1.46928
-3.0149	-1.5257	-0.348844	-1.07312	1.46348	1.58627	1.23847	0.532284	1.53788	2.35933
-3.17982	-1.01004	-1.70058	-2.53985	-1.14112	0.156586	2.20099	0.424996	2.24052	2.52059
-1.68238	-2.6605	-1.46076	-1.99088	0.166359	-1.27894	3.58193	-0.508684	1.81504	3.45199
-1.62789	-0.407332	-2.34751	-2.21133	-0.364094	-0.85965	0.58221	1.18817	2.03811	1.39593
-2.98495	-0.303606	-1.66119	-0.479539	0.433695	-1.40211	1.57596	0.623203	2.57896	2.20535
-1.90217	-0.894665	-1.93741	-0.73902	0.113992	-0.0159664	1.90468	0.941604	3.69682	2.66493
-1.70783	-1.51874	-1.34065	-1.35139	1.27948	0.419032	2.14153	1.14798	1.90622	4.16348
-0.201837	-1.81252	-0.414337	-1.05153	0.019502	0.174853	0.874714	0.69154	2.21641	2.63029
-2.14884	-1.81157	-1.05188	-2.11916	0.761293	0.131798	0.76252	-0.425549	2.55774	1.57736
-0.904312	-2.21403	-0.574998	0.0231981	1.10571	-0.551844	1.10641	2.62079	1.45192	1.7616
-2.92278	-2.22532	-0.881943	0.428573	1.30964	-0.0503188	1.28294	2.28219	3.35873	3.60884
-1.42564	-2.01364	-1.40916	-0.605024	1.0554	0.548876	2.01559	1.42898	2.59483	1.73021
-1.58577	-2.75271	0.477225	-2.73767	0.757657	0.366742	-0.822095	0.662146	1.00056	2.19164
-0.639623	-1.61363	-2.00781	-1.21534	-0.783998	-1.00052	-0.195183	1.0577	2.468	3.45589
-1.61148	-1.96948	-0.48245	-1.38484	1.44123	1.75917	0.992658	0.803396	4.47158	0.5469
-1.38628	-2.08225	-3.98367	-2.68351	0.15124	0.578535	0.637168	-0.577174	1.91414	1.94013
-2.14422	-1.20762	0.173563	0.638615	-0.352117	-1.18104	0.387101	1.52604	3.73931	3.56572
-2.30227	-2.05634	-0.736783	-1.55505	-0.559711	-0.58385	1.89745	0.929554	2.76332	1.49769
-3.38606	-2.2375	-1.42045	-0.215845	0.828184	1.69658	1.71208	1.37907	2.24358	0.317869
-3.24414	-2.9386	-0.0158022	0.585323	1.62036	-1.31852	0.851115	1.51474	2.88118	1.83336
-2.66964	-0.0949644	-1.58653	-1.51369	0.436961	-0.0961531	0.387471	2.61281	2.77113	1.25363
-0.889596	-1.67595	-0.47044	-1.76758	0.834009	-1.57545	2.26626	1.61966	2.61976	1.51107
-1.69497	-0.813602	-0.824704	-1.79068	-1.0107	-1.30045	2.02642	1.45798	3.41341	3.41637
-4.07566	-3.23935	-0.721411	-2.08836	0.32544	0.511757	-0.945683	0.840003	1.6842	3.40762
-2.05885	-2.77382	-1.4384	-2.24304	-0.379146	0.0940849	-0.383572	-0.187266	1.28469	2.81451
-3.29818	-2.42171	-0.844436	0.564343	-0.930211	0.22449	-0.383938	2.15539	3.49562	2.21985
-1.37702	-1.04823	-2.01641	-0.43028	1.13618	1.05226	1.41404	0.992331	2.54114	2.15288
-2.06984	-1.70997	0.648766	0.281937	0.0325314	-0.505993	0.757291	0.00712211	2.71835	2.0042
-1.38545	-4.58691	-2.05422	-0.331514	-1.38766	1.11019	1.23945	1.31502	0.344111	1.27314
-1.35954	-4.07669	-1.83171	-1.31793	-1.14968	0.1613	2.0461	1.17204	3.10048	2.21374
-1.67946	-1.45805	-1.22117	-0.716718	0.735606	0.645279	0.277097	1.89417	1.18553	2.42106
-1.40205	-2.58467	-1.11766	-0.312699	-0.695045	-0.336068	0.429025	1.30552	2.55566	0.42305
-1.40701	-1.41451	0.210627	-3.20909	-0.827423	-0.217064	1.21968	0.314114	2.06771	3.13617
-1.0363	-3.56304	-2.0907	0.0694032	1.46373	0.433958	3.44992	1.68039	1.57864	3.19568
-2.83115	-1.66671	0.67997	0.0410401	-0.172342	-1.05803	0.673438	1.11459	2.18417	2.34855
-2.21681	-1.31161	0.48702	-1.15404	-0.485677	0.282778	3.33455	0.161571	0.0668002	0.738367
-1.52864	-1.7927	-1.14042	-1.47448	0.504429	1.22388	-0.767696	2.09352	0.993566	1.2489
-1.55455	-1.82235	0.214241	-0.479458	0.252669	0.422053	1.88917	2.91065	3.00151	2.18911
-2.87625	-1.46993	-3.06558	-3.30823	0.365808	0.89624	0.910839	1.49774	1.36417	2.8144
-2.6386	-0.449518	-0.948466	-0.903059	1.67755	-0.459043	-0.119679	0.552336	-0.512647	3.1074
-0.933857	-2.68922	-0.26732	-2.2706	0.276711	-2.19378	0.960222	2.87667	0.755674	2.27648
-1.84292	-3.42732	-0.0254668	-0.332297	0.990514	0.0972819	-0.499188	1.23774	2.58185	1.05607
-1.90659	-0.445171	-1.6386	-0.900977	0.211164	-0.123922	1.14498	-0.438955	2.56817	2.89821
-1.81318	-1.05718	-0.707519	0.465209	0.198724	0.853138	1.71612	1.28264	2.95063	1.63614
-0.775557	-1.86297	-1.28238	0.402755	-0.0866379	-1.50045	1.59341	0.86834	0.69981	1.20791
-0.882754	-2.21109	-0.129139	-2.13191	-0.799373	1.62032	2.36667	0.927405	-0.72946	1.30018
-1.77574	-3.51879	-1.18397	-0.409289	0.828395	1.22256	-0.727636	0.776963	3.0263	3.39722
-2.73612	-2.35774	-1.32863	-1.42482	0.501491	-0.0744842	2.50239	1.33273	3.09732	1.57576
-1.45184	-3.11528	-1.67436	-0.562714	-0.528237	-0.508394	2.11273	-0.299542	1.42211	3.18983
-1.84383	-3.59964	-1.3063	-0.827143	-1.33155	-0.224919	1.88853	0.41357	1.92573	2.38329
-2.39882	-2.69994	-1.6688	-1.5522	0.549481	-1.22457	2.01765	1.75187	3.27262	1.18953
-0.409156	-2.76568	-1.30826	-1.90533	-0.796748	0.205558	-0.261462	2.39219	3.58291	0.639868
-2.15871	-1.10879	-0.371746	-1.49945	0.420071	-0.728414	0.317674	2.04547	3.36656	1.65401
-2.72095	-1.57288	-2.43908	0.608757	0.386416	-0.579991	1.45597	1.8226	3.89618	1.89573
-2.11981	-2.92223	-0.692463	-0.797467	1.94391	0.425161	0.133401	0.750947	2.38796	1.87881
-2.77322	-1.24948	-0.927025	-2.27999	0.325998	0.231196	1.24374	0.923941	2.89259	1.72514
-2.60356	-1.24643	0.24133	-0.77399	-1.70005	0.450219	-0.261749	2.29672	0.829157	1.55752
-1.97329	-2.85505	-0.0648347	-0.242726	-1.62559	0.998919	0.328198	2.09751	1.26488	2.28802
-2.07495	0.114537	-0.0393841	-0.562893	0.276113	-0.412136	2.44304	0.912374	1.42683	2.00129
-1.93665	-2.78755	-1.63595	-0.928256	0.470415	1.20286	0.530346	1.2022	0.716303	0.774695
-1.67222	-2.38824	-1.42463	-0.568372	2.48327	1.69324	0.100442	0.636389	2.08903	1.61455
-3.39513	-1.62995	-1.03462	-0.200391	-0.392888	-0.513753	1.82472	1.60967	2.53569	1.00295
-2.99744	-0.763265	-0.154172	-1.52926	0.25286	0.850639	-0.0194778	-0.0882313	1.51335	2.40667
-0.883701	-1.32476	0.146336	0.00952225	1.97883	0.390723	1.24168	1.81145	-0.0801058	2.02435
-1.97755	-2.87104	0.54178	-1.90234	-1.12442	-0.565173	1.57641	0.0596685	4.97134	3.81617
-1.71257	-2.76218	-1.76184	-1.6782	0.394598	0.668558	1.39452	2.7264	1.59603	2.06237
-0.929274	-3.37665	0.385348	-1.99083	0.354758	1.84415	-0.230965	0.186665	2.5891	3.57305
-0.54828	-2.10801	-1.15101	0.546413	1.50762	-1.08718	1.56198	1.63883	1.05143	1.16754
-2.69217	-3.14658	-0.457655	-1.92045	0.44368	-1.45264	-2.29161	1.17355	3.30781	0.704121
-1.43207	-1.57613	-1.37321	-1.6184	-0.97874	-0.714641	0.846506	3.07551	3.22064	0.679619
-1.26088	-2.10799	0.202289	-1.4138	-0.0278192	-1.42135	2.64704	0.847881	3.04254	1.72675
-2.58428	-1.89684	-0.611464	-0.0433258	0.202922	0.429112	1.87582	1.04316	2.47402	1.06958
-3.21682	-2.1689	-1.67071	-2.15677	-0.148647	-0.71694	2.83956	-0.245418	2.75215	1.38882
-2.83912	-0.720143	-0.429808	-1.4418	0.604648	0.423664	0.486816	1.46008	4.34803	1.10991
-1.53568	-2.40477	0.435042	-2.62741	-0.466636	1.66397	0.901151	1.02753	1.72245	3.39389
-2.51845	-0.946217	-1.13972	-2.09951	1.7677	-1.27518	1.65289	2.10613	2.21669	1.68261
-2.63514	-2.13931	-3.63962	-2.88615	-0.0248319	-1.7318	0.20233	1.478	2.21072	3.58528
-1.43583	-2.76791	-1.17091	-1.05168	0.754446	1.03672	1.11777	-0.0640542	4.37711	1.55697
-0.736641	-1.74153	-1.09374	-2.01812	0.670354	-0.170833	1.50004	0.495334	1.8318	1.36683
-0.419982	-1.99322	-1.98092	-1.3553	-0.808612	-1.0697	1.31373	1.03904	-0.282545	1.79664
0.787361	-1.59387	0.428606	0.398568	1.62801	0.441708	0.746076	0.751601	2.36955	2.04286
-1.81275	-3.33003	-0.802492	-0.495065	0.072576	-0.720635	0.0910116	1.53414	2.01489	0.0869162
-1.73946	-3.38554	0.71446	-1.06259	0.263409	1.13856	2.24356	1.80552	1.77608	3.08284
-2.28842	-2.32936	0.466018	-0.616084	0.202813	-0.762207	1.72938	1.27459	2.45824	3.26732
-1.10632	-2.30907	-0.306544	-0.866026	-0.177025	0.788635	1.72767	2.49483	3.53322	1.40379
-2.2801	-2.78684	-1.35606	-1.33736	1.83293	-0.364188	0.0349608	1.59452	1.82996	3.5426
-2.36694	-2.55877	-1.36667	-1.87279	-1.89112	-0.381043	-0.764266	-0.00996833	2.85723	2.8283
-0.186025	-2.85721	-1.41656	-1.25008	0.637213	0.240674	-0.21455	-0.329692	2.27086	2.19318
-3.15042	-2.62358	-2.3272	0.621363	-1.35787	0.347919	0.904612	1.79541	1.91572	1.83204
-0.911889	-3.93976	-1.36732	-0.875073	0.589605	-0.482234	1.30138	-1.09966	1.98329	0.947735
-0.607633	-2.93031	-2.07625	-1.62026	-1.48895	-0.501489	0.291023	2.473	3.16902	1.4331
-2.99398	-3.32971	-0.354008	-2.05972	1.4521	0.114133	2.28653	1.1605	2.48207	4.72455
-1.55282	-2.69613	-0.334544	-1.8121	0.152987	0.47276	1.33038	-0.137186	0.971445	2.88776
-1.84168	-1.9873	-1.61479	-1.77739	2.31443	0.920076	-0.330593	0.925926	1.95147	3.1765
-4.41589	-2.0911	0.627293	-0.565167	0.379842	-0.063632	1.54183	0.343676	2.64616	3.48379
-1.62014	-3.28755	-0.811353	-2.12376	-0.797964	0.141758	0.335558	1.15639	2.96239	1.7844
-3.34306	-2.09336	0.469061	0.608494	0.378209	-0.168949	-0.483806	0.468165	1.74117	2.93554
-0.440654	-0.56941	-1.82186	-0.926042	-0.161421	0.778309	1.1101	1.54412	3.02588	2.10384
-0.28947	-2.87232	-0.975554	1.14324	-1.08774	1.08292	0.353726	1.55904	2.56835	0.909683
-1.44598	-2.5392	0.0398592	-0.381915	0.0888176	-0.576929	0.491424	-0.315231	0.399598	-0.438128
-1.30836	-2.09234	-0.884344	-1.91511	-0.149859	-1.53461	0.497013	-1.00199	3.45975	2.07969
-3.85406	-1.43127	-0.431349	-1.46178	0.654218	0.15196	-0.140809	4.20881	2.36771	1.22686
-4.07786	0.347616	-0.857384	-1.9515	1.47384	1.08602	1.164	1.92133	2.5627	1.9358
0.706125	-2.65136	-1.52088	-1.31794	-0.816306	-0.59151	1.40578	-0.527766	1.50677	2.11968
-2.04971	-1.92021	0.481185	-1.86974	0.885152	2.60389	1.90807	1.308	1.52723	0.98477
-1.63208	-1.40827	-1.89827	-0.8651	0.742109	-1.63069	2.65063	1.49918	2.59118	0.953256
-3.65367	-3.03045	-2.77584	-2.26005	1.04773	1.49094	2.5557	1.76242	3.27013	2.2907
-1.15914	-1.54997	-2.67	-1.37448	1.0481	-0.214952	0.0105669	0.16185	0.401118	0.957491
-2.65984	-3.32392	-2.72901	0.193789	-0.0857666	1.39816	2.05621	-0.765027	2.39396	1.25642
-1.63615	-2.41909	-3.03107	0.0121808	-0.0950877	1.30973	1.16821	3.12498	1.85043	1.70618
-1.01565	-0.934409	0.264336	-1.18371	0.500999	0.119867	1.05381	-0.68633	2.43503	2.26946
-1.29835	-1.6799	-2.79823	0.110796	0.246461	-0.679952	0.433029	0.958351	2.53563	3.40008
-1.71112	-1.1174	-0.754533	-1.89543	-1.96644	-0.115266	0.886675	1.11287	3.48542	3.31906
-2.72997	-3.59122	-1.99842	-1.71611	1.10875	0.252576	1.24439	-1.51522	3.24046	2.51258
-1.40481	-1.72667	-0.725063	-2.53504	0.235012	1.45512	0.628859	0.823418	3.33279	1.56651
-1.70189	-2.13264	-1.81574	-0.101809	1.34488	-2.13443	1.37204	0.498641	0.561027	1.85182
-4.25108	0.893593	-1.79416	-0.268563	0.734186	0.945694	0.702011	0.382446	0.36496	2.95683
0.742155	-2.51022	-1.1711	-1.02215	-0.908532	-1.22023	1.03545	1.64295	1.53913	1.48641
-1.16665	-1.91108	-1.44486	-1.44975	-0.526224	0.626525	-0.625443	0.845651	1.4938	2.53939
-1.74661	-1.65671	-1.79591	-2.11003	-0.252533	-1.28487	-0.0169227	1.92522	1.29243	-0.383991
-0.926497	-2.66905	-1.64313	-1.85994	-1.36013	-0.0394717	-0.134117	2.17015	2.12105	2.65272
-1.28465	-1.29234	-1.53638	-0.791898	1.80533	0.76415	1.42162	0.452305	2.1933	2.83682
-4.54872	-0.53166	-0.427724	-0.254622	-0.00383741	0.420291	2.37792	1.81258	-0.208683	3.02583
-1.34258	-2.58222	-1.99015	1.27609	-0.165059	-1.44738	1.20658	0.768758	1.67626	3.89633
-1.95212	-1.48753	0.972313	-2.04827	-0.208803	0.484447	1.54584	2.67406	3.69611	2.98106
-2.28432	-1.47459	-1.57837	-1.98999	-0.599685	0.0759656	0.7749	1.62648	3.91099	3.73743
-4.05088	-1.78809	-1.5548	0.412908	1.80029	1.36744	-0.258205	1.54734	3.23317	0.972175
-0.889492	-1.24865	0.245687	-1.35499	-2.14094	-1.67388	3.05091	0.431074	2.4971	1.06369
-1.78213	-2.78052	-1.03084	-0.55608	-0.698843	-0.891595	1.03987	1.98868	2.9925	1.10605
-1.92964	-3.1863	-0.455756	-2.75614	-1.23196	1.43496	2.31005	0.0198875	1.11026	1.48504
-1.87939	-2.17441	-0.902761	1.70493	-0.286131	-2.43129	-1.11156	1.09206	2.87902	0.575675
-1.50056	-0.611158	-2.44619	-1.49679	0.605804	-1.51361	1.1013	0.37507	0.612299	1.39396
-1.14946	-2.83154	-0.556844	-0.648888	1.46085	-0.250434	1.54495	-1.04311	2.11092	1.43044
-2.9675	-2.86573	-2.02803	-1.31113	-0.636726	-0.447873	2.30242	1.27996	2.82315	2.9545
-2.87045	-3.03853	-3.06715	-1.05085	-1.31185	0.279249	1.27743	1.93325	1.96288	0.497113
-0.00848475	-0.700371	0.0249806	-1.47474	-0.513356	0.706425	1.39341	1.02228	2.23433	0.783892
-2.59207	-1.95034	-2.21149	-0.753435	1.56928	0.577467	0.173429	-0.221249	1.90063	2.11601
0.478005	-3.77869	-0.58094	-2.21434	0.506463	-1.08117	1.67712	1.10197	3.9781	1.72581
-1.60425	0.00327176	-1.06031	-0.821981	-1.52914	0.0265965	1.31901	0.642824	2.21923	3.24806
-1.85118	-2.55134	-2.75936	-0.687134	1.44277	-1.87813	1.29231	0.689869	2.81793	2.86531
-0.730132	0.260748	0.164418	0.721827	1.02285	-0.38088	1.51659	1.75631	3.47312	2.72113
-2.18292	-0.806544	0.948656	0.705448	0.559833	0.87515	2.22894	-0.118383	2.72795	1.05531
-2.95933	-1.73603	0.360131	-1.73589	0.287685	-0.506522	0.897479	1.95715	3.04964	1.86056
-1.36097	-2.45165	-1.36493	-1.36185	0.357132	0.759363	-0.656079	0.633257	2.32071	2.34179
-2.52973	-1.36708	-1.56501	-0.959615	-1.10631	-0.563277	0.936121	2.21731	1.37753	2.49103
-1.125	-3.04937	-2.28144	0.176584	-0.792426	0.00975862	-1.81274	1.32299	0.265364	1.43469
-2.60735	-1.58186	-1.01415	-2.7928	0.339201	0.132698	1.36392	0.438696	3.8258	3.09178
-3.54178	-3.02519	-0.250839	0.0305634	1.02024	0.579779	0.0206282	0.416711	1.75288	2.28312
-1.67403	-1.19486	-0.394399	-0.429541	-0.567192	-1.00887	2.60767	2.32811	1.95129	2.50492
-1.72626	-2.07594	-0.597447	-1.17208	-0.199076	-0.0986162	0.286865	0.29915	1.90024	2.5559
-0.317522	-1.79781	-2.80861	-1.11561	1.73413	-1.15629	0.217009	1.43133	1.68454	2.03331
-2.52796	-4.07126	-3.6053	-0.0967417	0.592847	0.232484	-0.443101	2.26994	1.36064	3.8254
-1.47383	-2.45028	-0.4993	-2.47692	0.623561	0.85897	0.7636	1.91104	-0.0632511	2.87399
-2.34875	-2.10562	-0.635071	-1.00348	1.01896	-0.516486	1.31426	1.03739	1.81909	3.05091
-2.86173	-1.52686	-1.53133	-2.1634	0.638604	1.30397	0.255788	2.68039	2.42888	1.66093
-2.13888	0.65214	-0.378184	0.58815	0.259155	0.104306	0.507045	1.37974	2.46372	3.2488
-2.65625	-1.72044	-3.19959	0.618087	0.173813	2.20894	2.13089	-0.26578	2.77561	1.64135
-2.60772	-1.27019	-1.21066	-0.78929	-0.440877	-0.77159	3.05254	1.55744	2.22723	1.51372
-2.88719	-1.92267	0.000823984	-0.768519	0.10982	-0.0453358	1.42029	1.34746	2.87743	3.22211
-1.92658	-1.58397	0.697872	-2.6571	1.51191	1.07125	2.17183	1.45882	3.62837	2.42455
-3.8792	-1.42454	0.454266	-0.932199	0.656402	-0.457004	1.156	0.83609	3.44162	1.66798
-1.89794	-0.815696	-0.380262	-0.324717	0.539558	1.19247	-0.891998	0.883317	3.31665	1.84623
-2.79484	-2.1259	-2.10768	-2.61838	-0.195611	-0.337437	-0.00694448	0.740206	2.03403	1.9654
-2.96035	-2.84391	-2.30396	-0.308465	1.38235	0.0321586	0.394348	0.671502	3.91171	2.89084
-1.37166	-1.46279	-0.147843	-1.50782	2.05216	-0.465933	1.55058	1.3661	1.77963	2.13103
[truncated: 3,000 more rows]
