# Supplementary material
Source: ML conference proceedings conference paper supplement (https://openreview.net/forum?id=jVuknNhGmV)
Supplement: supplementary_material [file D.xlsx]

## Sheet: Sheet1
-0.791905
-0.191873
0.837449
-0.669169
-0.389366
-0.477091
-0.514597
0.582429
0.0588968
-0.269957
-0.689548
0.523804
0.39648
0.182288
-1.13514
0.0212162
0.707066
0.215718
-1.3427
1.15602
0.281564
0.154778
0.210755
1.60284
-0.0430342
1.04875
-1.13264
-0.110199
0.952024
0.785249
0.353045
-0.610416
-0.211405
0.423694
1.43679
0.29719
1.3371
-0.249294
-0.183252
1.00428
0.435777
2.30605
-0.250736
-0.528769
0.223623
2.26683
1.2416
0.0940717
0.890403
1.0378
-0.148789
1.87975
0.365089
0.585175
-1.32736
0.0394137
1.6262
-0.255105
-1.14683
-1.47618
-0.0403613
0.484608
0.10156
0.924676
-0.0275013
1.59185
-0.613821
0.143855
0.0539415
-1.28333
-0.0584726
0.0965835
-0.762155
-0.689446
-1.00158
0.316437
0.817454
0.465071
0.106074
-1.83299
0.945116
0.44733
-0.513014
0.988353
-0.585699
0.466623
-1.09495
-0.243869
0.465227
-0.549451
-0.314479
-0.826215
0.238838
-0.438024
-1.06463
1.53493
-0.0359821
0.404489
0.78921
-0.972871
-0.436668
0.982827
-1.15404
-0.0633507
1.14627
-0.051888
-0.1186
-0.588126
-0.328726
0.347862
0.00685304
0.406775
0.714076
1.46676
0.382372
0.574989
0.332345
0.129865
0.974303
-0.337168
-0.763075
-0.413145
-1.24871
0.238796
0.325485
-0.451079
-0.556366
-1.22933
1.47518
0.517592
0.346982
1.5091
0.753986
0.181335
0.636851
-0.827831
-0.0568342
0.885299
0.251835
0.239478
0.385565
1.29469
-0.79098
1.28122
0.243812
-0.0572908
0.305364
1.3135
0.408097
-1.13747
-0.607281
0.6592
0.287398
-1.86076
-1.46157
0.676991
-0.80002
0.520326
0.295279
-0.546132
-1.14901
1.39248
1.5039
-0.487028
0.560344
0.146487
-0.864641
0.367029
-0.536175
0.478311
-0.202606
0.675571
-0.00619125
-1.49098
2.02711
-0.722219
-0.655781
-1.07438
-0.143175
-1.87336
-0.0125368
0.653748
-1.97134
0.442533
-0.317862
-0.769259
-0.632228
0.121085
-0.689947
1.45938
-1.05385
-1.68201
0.493801
0.0599525
0.137897
-0.341481
-1.01364
0.640601
1.48343
0.784543
-0.330541
-0.822148
-0.806006
-0.149749
0.301696
1.19206
-0.904148
-1.01881
-0.802204
-1.31891
0.915681
-0.417854
0.819747
0.0993894
-0.10327
-0.805167
0.0237901
0.106491
0.530843
1.08511
-0.396966
-0.647333
2.1374
-0.0468168
-0.453251
-0.232619
0.184579
-0.276885
0.263817
0.209698
-0.195672
0.337281
-0.379931
0.362156
-0.780479
-0.0630573
0.931133
1.13787
-0.97812
-0.525022
1.15874
0.0839119
0.64488
0.595873
0.646033
0.243334
0.0972052
-0.258863
-0.2074
-0.703352
0.33826
0.0350614
1.11683
-0.473967
-1.0266
-0.590484
0.054471
-0.629108
-0.358627
1.68663
0.880752
0.42928
-0.498957
0.940064
-0.188949
1.18355
-0.304205
0.570606
0.370504
-0.863713
0.177325
0.295585
0.33198
-0.3624
-0.366856
-1.53032
-0.141196
0.513727
0.143191
0.419857
-0.106493
-0.0585311
-0.0925475
1.42377
-1.5715
-0.972754
0.364658
-0.456549
-0.677705
0.374462
-0.0262926
0.380099
0.160651
0.538494
-0.789814
-0.885177
0.167441
-0.152076
0.973296
-0.844853
0.0434493
-0.465278
-0.180464
-0.626109
-0.44449
-0.0337603
-0.603508
0.102072
-0.339422
-0.793183
0.550655
-0.0715885
0.677044
0.0446878
0.757209
0.0105992
1.3956
0.352606
-0.921264
0.11479
0.655659
0.121145
-1.34839
0.910953
0.265793
2.03981
-0.652271
0.064269
0.757141
-1.02862
-0.176302
-0.166539
-0.00542635
0.25909
-0.748471
-0.673141
1.60392
0.919733
-0.859225
0.0273236
-0.480827
-0.106396
1.02151
-0.606501
0.772139
-0.791001
0.452073
-0.231981
-0.886918
0.127049
0.405356
-0.488109
-1.4037
0.72825
-0.189808
-0.556488
0.261702
0.273227
-0.421423
-0.724954
-0.102119
-0.666058
1.2085
0.79884
0.923093
-0.147547
1.14855
1.25405
-1.50858
-0.223665
0.431345
0.310771
-0.948403
0.254229
0.237171
1.1873
0.739744
-1.21779
0.24981
1.67309
-1.43322
-0.479555
-0.124148
-0.225454
0.578597
-1.4573
-0.434296
-0.304514
-1.85162
-0.686728
1.70281
-1.12165
-0.840278
-0.672777
-0.236672
1.05663
-0.475936
-0.866851
0.825075
-0.924172
-1.20012
-0.585212
1.38392
0.936346
0.127943
0.096289
0.597701
-0.316043
-0.425229
0.0307412
1.13856
-1.0063
-0.608732
-0.710946
0.148255
0.529494
0.076543
-0.419808
-1.79428
-0.216153
2.59846
0.792499
-0.245378
-0.440092
2.5043
-1.23396
1.15607
0.723388
0.304973
-0.854615
-0.240503
0.117772
-0.553988
0.472672
-0.127733
0.00533051
0.286075
-0.878336
1.31402
0.753175
-0.112323
0.254292
-0.491099
-0.265542
0.4845
1.92669
1.01178
-0.233763
-0.441251
-0.407301
-0.950364
1.7071
-0.336317
0.884422
0.294065
-0.283874
-0.239081
-0.386017
-0.169015
-0.850808
-0.677577
-0.884721
0.381017
-0.100608
0.589218
0.482366
0.741217
-1.24138
0.88372
1.56522
0.0216948
0.240897
0.549683
-1.0354
0.548518
0.479167
0.0266878
-0.22717
-1.12285
1.23455
-0.545159
-1.2921
-0.757326
-0.0475011
-0.157423
-0.468912
0.693131
-0.141594
0.317025
-0.310876
-0.316571
1.48527
-1.16932
-1.74124
-0.271328
0.0460621
0.884326
1.04299
-0.224496
-0.852547
-1.20509
-0.293823
-0.678437
-0.769248
1.58731
-0.628012
0.843855
1.923
-0.911334
-0.260001
-1.05005
-0.0628662
-0.799102
-1.07047
-0.545938
1.22853
0.0497302
-0.0310304
-0.617604
-0.193802
-0.85588
-0.536171
-0.862851
0.456763
0.773098
0.245032
-0.272905
-0.174647
-0.781748
-0.800981
1.21798
-0.195718
0.645446
-0.554555
-0.381724
0.106357
1.29109
-0.564262
-0.357609
-0.364684
-1.25245
1.65368
-0.900771
-0.489931
-0.19525
-0.553913
-0.24522
0.58041
0.517167
0.359192
-0.736764
-0.474927
-1.50932
0.024559
-0.901324
-0.333483
-0.420428
0.788733
0.143354
-0.991582
0.0107896
-0.146538
0.207247
0.251448
0.336173
0.0926323
-0.91666
-0.522465
0.307859
-0.747079
0.158125
-0.262598
-0.503321
1.19152
-0.467067
0.670593
1.51078
-0.5347
-0.845502
1.05972
0.00192788
-0.928253
-0.000697973
-0.278155
-1.07219
0.522622
-0.27559
-1.61241
-0.562179
-0.124892
-0.218539
-0.360129
0.095691
0.301507
1.37073
-0.871062
0.264241
-0.506421
-0.512963
0.121998
0.463196
-0.437979
0.215106
-0.169382
0.298772
-0.635146
1.27437
-0.181295
-0.54082
0.719698
-0.792773
-1.03848
0.162239
-0.748115
-0.154771
-0.00738797
-0.283024
-0.911016
0.0253679
0.200691
-0.740122
-0.581246
-0.360223
0.619408
-0.418379
-0.780996
0.746865
-0.53624
1.17365
0.783645
-0.375576
-1.36663
-0.150481
-0.419508
0.692889
0.0926398
0.519297
-0.715035
-0.506803
-0.231497
-0.46647
0.281348
1.10313
-0.112369
1.49095
-1.78718
0.480355
0.611578
0.220109
0.740777
1.89666
-0.505129
-0.837798
-0.4521
-0.346038
-1.32108
-0.250982
1.00804
-0.137715
-1.2368
0.0916299
0.146998
0.170412
-0.451488
-0.433511
-0.0633447
-1.04643
0.253098
-0.910648
-0.485609
-1.17424
1.75414
0.271049
-0.570083
1.71417
1.69491
0.0615249
-0.915772
0.515813
0.481656
-0.634874
1.12467
0.558251
-0.146236
0.681544
1.20075
-0.757981
0.676333
-0.526084
0.276274
-0.315016
-0.374858
0.546256
0.742184
1.23732
-0.265751
0.56654
-0.628105
0.920168
0.501982
-0.631672
-1.29489
0.906434
0.647512
1.27562
0.0358646
-0.163982
0.915254
0.281244
-0.735127
0.467941
-0.748445
-0.15198
0.388958
0.118001
-1.22708
0.521334
0.487249
0.427861
0.882444
0.291104
-0.613206
-0.141807
-1.09254
-0.562076
0.522009
0.350973
0.366924
0.151995
-0.0214091
-0.0430812
-0.0652568
0.785377
0.361643
0.933819
0.493575
0.84891
-0.129755
-0.536097
0.772808
-0.564686
0.237756
1.08438
1.66858
-0.157249
-0.22073
-0.748195
-1.50079
-0.812614
-0.312304
-0.404432
-0.107109
-0.941078
-0.682607
0.222473
0.341894
-0.262004
0.68765
0.478246
-1.23841
-1.05156
1.15709
0.232489
0.278586
0.034061
-0.146152
-0.184154
-0.0283943
1.19563
-0.0246262
0.835349
-0.0804568
-0.334531
0.264622
0.434279
0.523175
-0.0706321
-0.133235
0.771382
0.294436
-0.0234046
0.183544
-0.0509857
-1.77827
-0.57281
-0.3714
0.61171
-0.44151
0.294195
-0.540442
-0.430174
1.05091
0.168661
0.493173
0.511843
1.17098
0.838957
-0.165592
0.0201627
0.31059
-1.30398
0.263538
-0.536626
-1.01068
0.603378
0.03282
-0.136731
-0.603296
-1.48568
-0.500222
2.18387
0.860085
0.31592
0.580307
-1.40807
-0.278817
0.568384
0.0988511
1.42883
-0.125757
0.779513
0.169332
1.3868
-1.23409
0.169917
-0.654998
-1.1259
0.237008
-0.17555
-0.172254
-0.121913
1.29699
-0.787355
1.3699
0.0960273
-0.935416
0.223068
0.017289
1.68377
-0.529801
-0.726395
-1.26627
-1.20865
0.214594
0.257684
0.682857
0.432561
0.186359
-0.0607263
-1.53681
-0.0675286
0.474769
-0.825616
-0.976618
0.549199
-0.569993
-0.750701
0.287464
0.0375109
-0.516479
-0.000737912
0.00706535
0.172923
0.561511
0.695305
-1.52781
-0.672952
1.21576
-0.513211
-0.250406
0.373911
1.04671
-0.607811
-1.10221
0.165027
0.136257
-0.374797
-0.787933
1.88494
-0.972542
0.304621
0.642541
-0.0298424
-0.416236
-1.20828
0.0296908
1.12979
0.670186
0.140262
1.10289
0.249701
0.302576
0.195907
1.19693
-0.067851
-0.0193444
-0.191762
0.871203
1.1454
0.739942
-0.703702
-0.864726
-0.543231
-0.0425374
1.6199
-1.07101
0.760904
-0.745845
-1.08558
0.386275
0.732827
-0.0477207
-0.208837
0.364077
-0.475839
0.711648
-0.0833062
0.133279
-0.837861
1.15617
0.839401
1.19786
0.334221
-0.49248
-0.873747
1.35002
0.30405
-0.613979
-1.06177
-0.426488
-1.79871
0.659678
-0.855079
-0.164599
-0.288785
-0.179824
-0.791004
-0.976481
0.869201
0.692338
-1.06728
2.02714
0.431109
0.260929
0.681045
0.404722
0.598355
-0.476586
-0.564132
0.513941
-0.551039
-0.571186
0.316223
-0.848888
0.0510324
0.557141
-1.0625
-0.16377
0.361281
0.638186
1.09302
0.639795
1.39018
0.00583878
0.530721
0.893576
0.753581
-0.175122
-0.793628
-0.124062
0.197984
-0.441231
-0.0249051
1.19432
-0.938132
-1.05927
0.701169
-1.16223
-0.505532
-0.731143
-1.08114
1.05866
-0.584493
-0.00179074
-0.209462
-0.760207
-0.540663
-0.492407
0.121863
0.128698
1.75764
-0.625271
-0.569171
-0.553163
-0.995068
1.22692
-0.210212
-0.682385
0.722999
-1.50753
-0.186936
0.226639
0.0323512
0.583407
1.48847
0.872726
-0.267254
-0.907666
0.898344
0.0527706
0.683668
-0.690012
0.11573
1.18819
-0.57299
0.268727
-0.584662
0.552584
-0.257706
1.15421
2.17903
0.637716
-0.502387
-0.40339
-1.72953
0.620041
-1.00647
-0.780378
0.601335
-0.0262931
-0.802585
0.499756
1.10615
0.0121978
-0.105127
-0.699976
1.03285
1.73126
0.333441
0.165212
-0.245525
0.133689
-0.0538719
-0.165279
-0.711492
0.703108
0.612926
0.177494
0.504077
0.137392
0.169902
0.156704
0.0515669
-0.888035
0.924487
0.16722
1.10614
-0.476778
-0.200591
-0.538958
0.133469
-0.227544
-0.819359
-0.881208
0.236719
0.649092
-0.56161
-0.254598
2.02726
1.63868
-1.62928
0.561848
-1.38293
-0.418726
-1.04898
0.629936
-0.671787
-0.112205
0.435408
-0.496351
0.185245
-0.529564
0.61321
0.061482
-0.358262
0.222694
-0.0973908
-0.612691
0.310179
1.55991
-0.334056
-1.13576
-0.365614
0.244569
-0.0995415
-0.449737
1.33488
-1.64283
1.32874
-0.541207
0.814961
-0.577887
-1.48045
-1.07635
-0.53861
-0.190241
0.807562
0.15721
0.904939
-0.230347
0.357394
0.166504
0.30063
-0.163797
-0.508489
-0.50597
-0.60594
1.67379
1.71578
0.495244
-0.752353
-0.247257
-0.0545409
1.2931
1.25714
-0.476329
1.65454
-1.26384
-0.263465
-0.0401586
0.614506
-0.211079
-0.232629
-0.0555859
0.883115
0.129656
-0.280169
-0.621288
-0.0822726
-0.773087
1.25008
-0.619789
0.204731
-0.0762441
-0.140607
-0.333065
0.0900689
-0.224169
-1.20863
-0.150387
-1.27804
-0.370347
-0.455365
-0.410918
0.749694
0.471957
-0.622439
-0.291178
-0.653152
0.171298
0.529339
0.470374
-0.701395
-0.966735
-0.952878
-0.128681
0.886888
-0.151776
0.465889
-1.13739
-1.01468
-0.702128
-0.390361
1.26101
-1.37309
0.264001
-0.785554
-0.695038
0.277933
-0.155444
0.00869049
0.567222
-0.324204
-0.748632
0.519295
-1.29819
-1.19958
0.594084
-1.61288
1.45253
-0.463404
0.427557
-1.34984
-0.422338
-0.453834
0.486161
-0.958397
0.364387
0.900334
1.03902
0.0995339
-0.679484
0.0707842
-0.273923
-0.389818
-1.25443
-0.681268
0.336681
-0.807436
-1.2478
-1.64958
0.350152
1.25072
-0.899384
0.637998
-0.72054
0.462027
0.264449
-0.755208
0.543258
-1.65848
-0.0380062
-0.0960368
0.588829
2.0379
0.842456
0.21808
0.682798
0.286628
-0.509705
0.304714
-0.682226
-0.184402
0.179427
-0.316402
0.15259
-1.00298
0.996699
0.376225
1.48244
-0.278031
-0.74893
-1.21222
-0.308588
-1.09724
1.71859
-1.20195
0.353282
-0.651489
-0.316606
-0.421307
0.434393
-0.665108
-0.225477
0.792822
-1.03929
-0.743989
0.11967
-0.714195
1.65465
1.35642
0.690727
0.966274
-0.328216
-1.52058
2.02437
-0.930246
-1.28198
0.603245
-1.42333
-0.922109
0.574845
-0.464163
0.367851
0.131495
0.956011
-0.526235
0.107127
-0.92089
0.0559851
-0.443903
0.560757
0.487144
-0.26134
0.513126
-0.10812
0.513636
-0.738727
0.0925429
1.54501
-0.46908
0.520717
1.00976
0.243524
1.54297
-0.473583
0.48764
1.33888
-0.388832
0.781882
-0.848039
0.3462
0.527416
0.439192
0.367026
-0.757402
0.0995404
-0.608885
-1.38439
-0.249399
3.31411
0.239689
0.110013
1.19672
-0.957316
1.01812
-0.126033
-0.182597
-0.219856
0.18315
-0.68354
-0.0642251
0.270307
-0.689932
0.365706
-0.526002
-0.579317
-0.105411
0.690158
-0.370061
-0.0369791
-0.0488056
-0.0976756
-0.246429
0.388102
-1.24886
-0.291937
-0.348684
-1.44501
-0.0575295
-0.832438
0.683661
0.293135
-0.684118
-0.0813948
0.109646
0.878863
-1.14005
-0.446016
0.0314138
-0.744667
-0.361447
0.320311
-0.624175
1.58123
-0.504883
-0.381219
-1.4392
2.66742
1.28021
-0.144418
-0.668376
-0.951806
0.570477
-0.089444
0.422571
-0.0473038
0.878809
-0.834588
1.19958
-0.267916
1.04376
0.36367
-1.00938
-0.34726
0.116705
-0.0249034
-0.462397
-0.785095
-0.553997
-0.865986
-0.235586
-1.53345
-0.323234
0.297919
1.63947
-0.0672323
0.307593
0.797451
-0.259601
-0.108448
-0.865831
-0.605951
2.01707
-0.689028
0.66653
-0.257488
-0.234015
-1.14022
-0.111206
-0.117537
-0.478139
1.06924
0.205285
0.456225
-0.338159
-0.656642
0.457752
1.43981
-0.854148
-0.522026
0.173229
1.07959
0.195762
-1.37744
2.44553
1.80921
-0.162609
-0.52468
-1.31163
0.0326001
0.172687
0.135382
0.27645
0.00649234
0.353228
-0.13242
-0.350813
-0.113832
0.632842
0.665374
-0.462732
0.331249
-0.162929
-0.610046
0.319246
0.0258344
1.37917
1.15918
-0.859102
0.741868
2.12477
0.520734
0.390897
1.10839
0.889555
0.932006
0.334094
-0.127539
1.12755
-0.499243
-1.07932
-0.361444
-0.0537011
-0.0959965
-0.884512
1.16941
0.347815
0.470331
0.661972
0.522733
-0.870114
0.540674
-0.794182
0.25465
1.47425
0.164544
-0.409717
0.213924
-0.108384
0.73653
-0.134081
-0.825124
0.505898
0.378611
1.35122
0.172958
0.0102411
1.21668
1.49523
-0.197205
-1.29598
0.506069
-0.433463
0.117548
-0.303931
-0.723369
-0.349579
2.47791
0.843198
-0.471536
-0.105243
0.491704
1.27262
0.426907
0.489965
-0.208262
-0.0904312
0.280405
-0.0187398
-1.02619
0.547473
0.210772
-0.399142
-0.0137866
0.605879
0.269606
1.46304
-0.17098
0.923683
-0.613077
-0.210694
-0.0861977
0.547462
-0.501738
0.149661
-1.70188
-0.683305
0.517972
-0.116435
0.627194
0.241551
0.910009
-0.501737
-1.12769
0.509058
-0.240009
-0.445282
0.322776
0.300022
0.761585
-0.709632
0.523906
0.845975
-0.897767
0.64451
0.410104
-0.355183
-0.852643
1.07722
0.439413
0.450701
0.883199
0.678905
-0.00497386
-0.127363
-0.472881
0.792628
0.965264
0.475048
0.480491
-0.511354
0.0307185
-0.777465
1.74987
-1.26551
-0.407543
1.57697
-0.98859
-0.748381
-0.244655
0.794466
-0.483806
0.0280903
-0.479189
-0.592086
-1.69311
-0.0500522
1.1734
-0.367778
1.76633
0.756464
-0.326825
1.07183
0.330606
-0.503945
-0.496191
1.03085
-0.453516
1.14219
0.193621
-0.126404
-0.0692249
0.482955
-0.31778
0.453686
-1.01308
-1.18372
-0.193909
0.453932
-0.800173
-0.409347
-1.12764
0.202704
0.423816
0.387597
-0.125561
0.041401
-0.215924
-0.615588
0.00252181
-0.49699
-0.384992
-0.558614
0.534132
-0.293665
-0.0129066
0.405487
0.796914
0.315879
-0.655408
1.31366
-0.584238
-1.02281
0.726998
0.53325
-1.02864
-0.81452
-0.434564
0.783758
-2.0113
-0.0893673
-0.502189
-0.329377
-0.186672
-0.270184
-0.911564
0.806979
0.649653
1.6795
-0.0185129
1.30389
-0.155549
0.90155
1.89933
-0.00877623
-0.499263
0.481522
0.0348076
0.72393
0.487145
0.644998
-0.418029
0.0696914
1.01065
0.369409
-0.965422
0.121698
0.967467
-0.753762
1.75714
-0.742022
-0.466882
1.9294
-0.31523
0.378421
0.147046
-0.717879
0.816928
-1.69831
-0.311326
-0.793606
-1.17698
2.22823
0.795641
-0.0736239
-0.321852
0.462196
-0.23941
-0.193292
1.47149
-0.170943
-0.478716
0.29634
-0.0691843
1.05277
1.58196
-1.21808
-0.146842
-0.637529
1.1402
-0.235665
-0.121459
-0.974561
1.47314
-0.311495
-0.0676572
-0.270117
-1.15208
-0.13583
0.424047
-0.327603
0.301496
-0.254821
0.329778
0.78675
0.690684
0.801938
-0.0826996
-0.159754
-0.672471
-0.217039
-1.8713
-0.352622
0.591378
0.966153
-0.310565
-0.372175
1.72923
-1.29135
-0.442258
0.143824
0.478265
1.43449
-0.503323
-1.77457
-0.0742023
0.194638
-0.919829
0.512505
-0.706268
-0.327434
-0.0853846
-0.0515276
0.380485
-0.0780977
0.251983
0.396981
0.594598
-0.676793
-0.858893
-1.65593
0.393979
0.0577273
-0.780752
0.173192
-0.96484
-1.03144
-1.37975
1.11333
-0.850617
-1.03801
-0.0292804
-0.939619
-0.287656
-0.402162
-0.23913
-0.427214
-0.0848578
-1.02492
0.224505
-1.6443
0.352428
-0.170263
-0.857275
-0.935236
-0.520961
-0.440339
0.0113184
-0.0147464
0.407553
-0.751127
0.117565
0.217339
0.40913
0.00263554
-0.0120647
1.18535
-0.982567
0.461018
0.0694373
-0.274557
-0.331185
1.04221
-0.312951
0.875425
-0.971902
-0.0166526
1.11287
-0.0782261
1.07668
0.997637
0.256337
-1.44787
-0.26874
-1.47887
0.806451
0.0886736
0.256752
1.13303
-0.218687
0.0500499
-1.2971
0.449984
-0.233729
-1.10946
0.671711
-0.469913
-0.953755
-1.34396
0.277803
1.51098
0.233529
0.219424
-0.772401
-0.685956
0.737038
-0.118827
0.87267
1.42125
-0.600474
0.0386808
-1.2756
0.582742
-0.597249
-0.233276
0.124366
-1.47842
-0.25502
0.235625
0.523552
-0.891342
0.127398
-0.0830182
0.554485
-0.635365
-0.288675
2.45079
0.679368
-1.45886
1.45689
0.209605
-0.140278
-0.604943
-0.179381
0.151861
0.216498
-0.603266
0.489981
0.446562
-0.592718
1.62245
0.17349
-1.00812
1.93281
3.04004
1.36575
-0.307851
-0.213944
0.655393
0.401
0.113851
-0.553252
0.220386
0.0549346
0.486573
0.473232
-0.507504
-0.931843
-0.316162
-0.292642
1.94019
-0.489331
-0.798412
0.127845
1.89066
0.723425
0.792336
1.05444
-0.129305
0.0670211
-0.389085
0.485255
-0.780906
1.39581
-0.641891
0.679476
-1.03757
0.953231
0.352265
-0.687825
0.256822
0.468289
-0.185491
-0.241846
0.398356
0.155986
-0.191527
1.24728
-0.565528
0.610991
1.63297
-0.609726
-0.779043
0.772266
0.232265
-0.544404
-0.519597
0.0645379
0.370938
0.348205
0.791698
0.363808
-0.0682116
0.744374
0.487013
1.32114
-0.850631
0.71379
0.150491
-0.258397
-0.521938
0.349326
-0.978889
-1.61729
1.81337
-0.815596
0.160727
-0.291372
1.5597
-1.50584
-0.383385
-0.947112
-0.868681
0.463334
-0.581936
-0.834049
0.639927
0.375337
-0.547965
0.356067
-0.717736
1.29424
0.881331
0.201152
-0.241725
0.117614
1.77737
-0.600257
1.31893
0.277575
-0.278897
-0.365894
-0.899594
0.558784
-0.741052
-0.125023
-0.183011
0.261112
0.586501
0.0218527
0.189966
-1.46733
-0.456142
0.519602
-0.273984
-0.202013
-0.286404
-0.321374
1.57271
0.553169
0.277982
0.208507
0.769327
-1.96909
-2.07443
-0.184125
-0.895627
-1.00096
-0.100112
0.597891
-0.0964214
1.13886
-0.126068
0.116287
2.02155
0.555581
0.192039
-0.78236
-0.0813856
-0.771995
0.762115
0.178765
0.613517
-0.362191
-0.359402
-0.885904
-0.0297052
0.390114
-0.0385522
0.926564
0.529469
-0.378334
1.25618
2.12176
-0.777969
-0.398137
-0.0562996
0.304657
-0.0355781
[truncated: 3,000 more rows]
