# Supplementary material
Source: ML conference proceedings conference paper supplement (https://openreview.net/forum?id=jVuknNhGmV)

JD_data_2


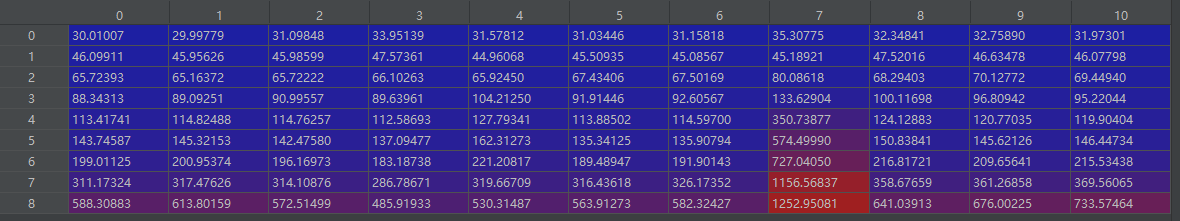


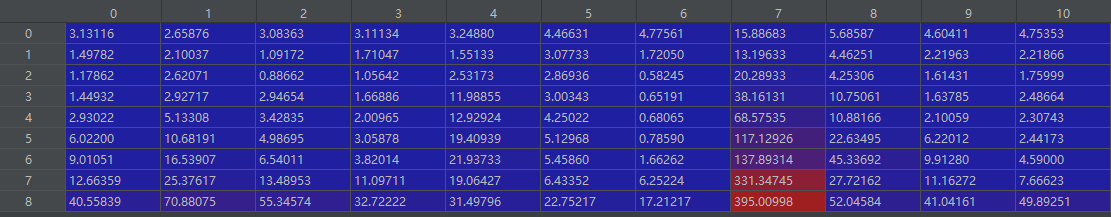


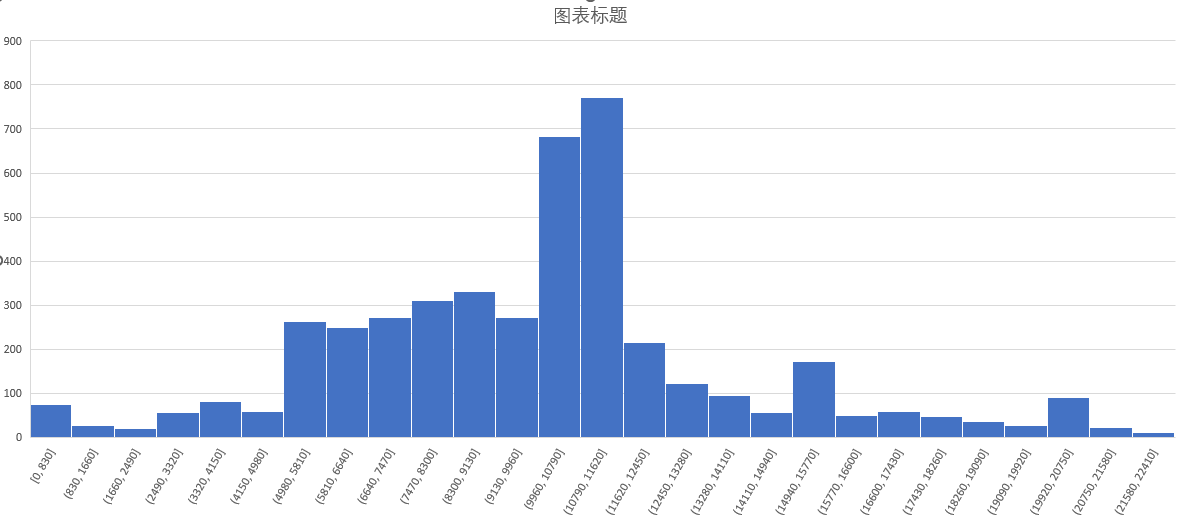

Supplement: supplementary_material [file res.docx]
